# Supplementary material for: Integrated analysis of the faecal metagenome and serum metabolome reveals the role of gut microbiome-associated metabolites in the detection of colorectal cancer and adenoma
Source: PubMed Central journal article supplement — Gut. 2021 Aug 30;71(7):1315–25. doi: 10.1136/gutjnl-2020-323476 (PMC9185821; doi:10.1136/gutjnl-2020-323476), 2021-08-30
Supplement: gutjnl-2020-323476supp005.pdf [file gutjnl-2020-323476supp005.pdf]

**Table S1 Baseline information of patient cohorts in this study**

| <b>Discovery cohort</b> | Abnormal(C+A) | Normal(N)  |
|-------------------------|---------------|------------|
|                         | <b>Num</b>    |            |
| Total                   | 61            | 31         |
| Male                    | 36            | 18         |
| Female                  | 25            | 13         |
| <b>Age</b>              |               |            |
| Average±SD              | 59.98±6.42    | 53.45±5.59 |
| <b>Stage</b>            |               |            |
| I                       | 1             |            |
| II                      | 13            |            |
| III                     | 20            |            |
| IV                      | 12            |            |
| Adenoma                 | 12            |            |
| No Record               | 3             |            |

  

| <b>Modeling cohort</b> | Abnormal (C+A) | Normal(N) |
|------------------------|----------------|-----------|
|                        | <b>Num</b>     |           |
| Total                  | 120            | 72        |
| Male                   | 79             | 31        |
| Female                 | 41             | 41        |
| <b>Age</b>             |                |           |
| Average±SD             | 59.88±6.5      | 50.08±4.4 |
| <b>Stage</b>           |                |           |
| I                      | 9              |           |
| II                     | 12             |           |
| III                    | 30             |           |
| IV                     | 19             |           |
| Adenoma                | 13             |           |
| No Record              | 37             |           |

**Validation cohort**

|              | Abnormal(C+A) | Normal(N) |
|--------------|---------------|-----------|
| <b>Num</b>   |               |           |
| Total        | 103           | 53        |
| Male         | 74            | 20        |
| Female       | 29            | 33        |
| <b>Age</b>   |               |           |
| Average±SD   | 58.15±7.2     | 53.79±7.3 |
| <b>CEA</b>   |               |           |
| Average±SD   | 88.59±797.0   | 1.84±1.1  |
| Median±SD    | 2.96±797.0    | 1.56±1.1  |
| <b>Stage</b> |               |           |
| I            | 8             |           |
| II           | 9             |           |
| III          | 18            |           |
| IV           | 20            |           |
| Adenoma      | 19            |           |
| No Record    | 29            |           |

**Serum and feces matched cohort**

|            | Abnormal (C+A) | Normal(N) |
|------------|----------------|-----------|
| <b>Num</b> |                |           |
| Total      | 33             | 11        |
| Male       | 21             | 8         |
| Female     | 12             | 3         |
| <b>Age</b> |                |           |
| Average±SD | 59.15±8.1      | 48.09±7.2 |
| Adenoma    | 2              |           |
| CRC        | 31             |           |
