# Supplementary material for: Integrated analysis of the faecal metagenome and serum metabolome reveals the role of gut microbiome-associated metabolites in the detection of colorectal cancer and adenoma
Source: PubMed Central journal article supplement — Gut. 2021 Aug 30;71(7):1315–25. doi: 10.1136/gutjnl-2020-323476 (PMC9185821; doi:10.1136/gutjnl-2020-323476), 2021-08-30
Supplement: gutjnl-2020-323476supp006.pdf [file gutjnl-2020-323476supp006.pdf]

Table S2. List of colorectal abnormal associated metabolites

| Metabolite feature  | Metabolite annotation       | approach             | F meanN     | F meanC     | F meanA     | anova nc adj | anova na adj | anova ca adj | F cvNp raw log2 | F cvCp raw log2 | F fc nc raw | F fc na raw | F fc ac raw |
|---------------------|-----------------------------|----------------------|-------------|-------------|-------------|--------------|--------------|--------------|-----------------|-----------------|-------------|-------------|-------------|
| X10.3_339.237mz_pos | (-)-Folicanthine            | exact mass match     | 7748.846605 | 5053.536056 | 5527.387681 | 0.00000527   | 7.36E-08     | 0.016360165  | 1.066851507     | 3.045501184     | 0.732979425 | 0.686815097 | 1.062715076 |
| X12.4_340.269mz_pos | (-)-Ormosanine              | exact mass match     | 45226.06503 | 31316.75757 | 27721.72218 | 0.0000798    | 0.0000327    | 0.374105369  | 0.82512597      | 0.830862497     | 0.687636808 | 0.562694393 | 1.222043114 |
| X10.9_313.166mz_neg | (-)-trans-Carveol glucosid  | exact mass match     | 364.3974089 | 8542.0151   | 9965.786895 | 0.002652316  | 0.000960176  | 0.295523934  | 7.802344415     | 1.555479803     | 8.146636736 | 8.049968526 | 1.01200852  |
| X15_265.108mz_neg   | (+)-2,5-epi Goniothalesdiol | exact mass match     | 32595.35307 | 22986.25282 | 25975.3202  | 0.001250629  | 0.001302286  | 0.43224324   | 1.276557314     | 2.675216985     | 0.752619218 | 0.720752853 | 1.04421261  |
| X20.8_388.119mz_neg | (+/-)-6-Acetylthiodiols     | exact mass match     | 6812.396901 | 10133.51548 | 3573.206732 | 0.004217867  | 0.0002535    | 0.116465099  | 6.234319405     | 7.015515802     | 1.484891164 | 0.526968596 | 2.817798206 |
| X12.5_321.241mz_pos | (±)15-HETE                  | exact mass match     | 11931.10675 | 8063.355578 | 8309.938888 | 3.99E-10     | 3.99E-10     | 0.00389225   | 1.0537419       | 2.554831014     | 0.707014986 | 0.657446626 | 1.075395262 |
| X14.9_265.108mz_pos | (±)-Goniothalesdiol         | exact mass match     | 24851.58866 | 16540.4257  | 15696.90897 | 0.002211296  | 0.000178788  | 0.127514798  | 0.650486116     | 0.819995262     | 0.718165912 | 0.582429257 | 1.233052604 |
| X15.1_333.226mz_pos | (±)-Pandamarine             | exact mass match     | 78154.92166 | 37693.09503 | 61456.22917 | 0.00000158   | 0.000472756  | 0.950049258  | 1.398514317     | 1.360676174     | 0.471657455 | 0.682169628 | 0.691407878 |
| X24_357.235mz_neg   | (1S)-1-hydroxy-23-oxo-2     | exact mass match     | 2067.046116 | 6783.212071 | 10613.37145 | 0.00000682   | 0.00010632   | 0.584324567  | 2.877609538     | 13.07421455     | 2.452112148 | 3.00547459  | 0.815881843 |
| X20.7_645.438mz_pos | (20R)-Ginsenoside Rh2       | exact mass match     | 19519.16483 | 12756.37371 | 12327.32875 | 4.39E-10     | 4.01E-10     | 0.003733196  | 1.465309488     | 2.612138841     | 0.666444891 | 0.589918254 | 1.12972147  |
| X11_428.321mz_pos   | (22E)-1α-hydroxy-24-oxo     | exact mass match     | 97120.90614 | 72845.20464 | 62220.94605 | 3.99E-10     | 3.99E-10     | 0.0064595    | 0.841975269     | 0.930335036     | 0.716145838 | 0.559366987 | 1.280279057 |
| X12.4_546.383mz_pos | (22S)-Acetoxy-3α,15α        | exact mass match     | 9231.270141 | 6429.061705 | 6092.236396 | 0.0000161    | 0.0000601    | 0.397096351  | 1.227501645     | 3.258940702     | 0.743957672 | 0.630497745 | 1.179952946 |
| X18.7_445.296mz_neg | (23S,25R)-1α,25-dihydrox    | exact mass match     | 19301.02292 | 32357.61626 | 37626.34194 | 0.0000078    | 0.001813676  | 0.985522683  | 0.507675713     | 0.769683063     | 1.729323187 | 1.728930055 | 1.000227384 |
| X4.8_524.344mz_pos  | (25R)-3α,7α,15α-dihy        | exact mass match     | 42278.66705 | 14322.95252 | 13266.55609 | 0.000000306  | 0.000571753  | 0.999569714  | 1.459558199     | 4.480875598     | 0.342545041 | 0.286060852 | 1.197455154 |
| X9_530.336mz_pos    | (25S)-11α,20,26-trihy       | exact mass match     | 38023.71975 | 26906.34985 | 25382.98412 | 3.99E-10     | 4E-10        | 0.022765966  | 0.916553919     | 2.051186976     | 0.708744036 | 0.614803877 | 1.152796954 |
| X12.2_502.357mz_pos | (25S)-3-oxo-12β-acetyl      | exact mass match     | 31958.1137  | 23103.82901 | 21531.79709 | 4.03E-10     | 3.99E-10     | 0.003719973  | 0.682227397     | 1.154315774     | 0.722037656 | 0.619163391 | 1.166150433 |
| X11.6_286.201mz_pos | (2E)-octenoylcarnitine      | MS/MS spectrum match | 13453.00627 | 33364.91448 | 33905.72166 | 0.000017     | 0.002253687  | 0.971075742  | 4.188632551     | 2.955775791     | 2.306003701 | 2.18233241  | 1.056669318 |
| X20.3_715.487mz_pos | (2'S)-Deoxyoxylol 2'-α-L-   | exact mass match     | 7748.409131 | 5609.9888   | 3555.197895 | 0.0000691    | 0.00000981   | 0.104453542  | 4.288444982     | 7.967021716     | 0.788635377 | 0.463329937 | 1.702103218 |
| X18.1_587.394mz_pos | (3b,16a,21b,22a)-12-Olea    | exact mass match     | 10628.13143 | 7185.808936 | 5500.136528 | 0.00000153   | 1.32E-08     | 0.009300059  | 4.374952618     | 5.498801314     | 0.718968946 | 0.50677689  | 1.418709022 |
| X12.2_364.232mz_pos | (3S,4S)-3-hydroxytetradec   | exact mass match     | 15772.88487 | 35269.11483 | 37464.98325 | 0.00000016   | 0.000855232  | 0.964062627  | 7.835010397     | 3.687203575     | 2.089298558 | 2.068529643 | 1.010040424 |
| X10.7_400.29mz_pos  | (3S,5R,6R)-3,5-dihydroxy-   | exact mass match     | 21795.06161 | 12037.97684 | 12218.58863 | 0.000342243  | 0.00000602   | 0.037985192  | 1.595370636     | 2.189918456     | 0.5725328   | 0.5305283   | 1.079174853 |
| X13_421.295mz_pos   | (4R,4aS,6aS,8R,9R,11aR,11   | exact mass match     | 11934.10061 | 8360.047954 | 6466.344251 | 4.19E-10     | 1.65E-09     | 0.183096218  | 1.699455832     | 2.957412625     | 0.730073449 | 0.522233108 | 1.397983848 |
| X14.7_442.337mz_pos | (5E)-(24R)-24,25-dihydrox   | exact mass match     | 49108.46688 | 36348.05832 | 29371.42209 | 4.11E-10     | 5.26E-08     | 0.684818542  | 1.027109275     | 1.550868479     | 0.727598766 | 0.547509065 | 1.328925515 |
| X22.2_445.311mz_pos | (6R)-6-methylvitamin D3     | exact mass match     | 4926.046547 | 2706.184577 | 3686.166487 | 6.53E-08     | 0.0000379    | 0.872966193  | 2.26998756      | 12.96484117     | 0.689016018 | 0.705749569 | 0.976289676 |
| X25.6_449.311mz_pos | (6R)-vitamin D3 6,19-sulf   | exact mass match     | 12298.18161 | 7151.685256 | 9222.914069 | 4.2E-10      | 0.0000248    | 0.801573237  | 8.812450938     | 14.90745789     | 0.618853611 | 0.718597583 | 0.861196343 |
| X27.8_353.212mz_neg | (E)-2-(4,8-dimethylnona-9   | MS/MS spectrum match | 148979.4135 | 661207.0536 | 1133916.741 | 3.99E-10     | 3.99E-10     | 0.134267366  | 1.84115847      | 2.063421286     | 4.322471299 | 6.715949982 | 0.643612798 |
| X15.8_555.713mz_pos | Galβ1-4[Fucα1-3]GlcNAc      | exact mass match     | 6637.175039 | 4303.392169 | 2880.885392 | 0.000108407  | 4.14E-10     | 0.000002363  | 7.311820369     | 14.74482086     | 0.471581349 | 0.443439817 | 1.672338207 |
| X15.8_511.018mz_pos | (N-Sulfolindol-3-yl)methyl  | exact mass match     | 29186.40004 | 22499.90694 | 18837.38392 | 3.6E-09      | 1.38E-09     | 0.02828573   | 0.807437688     | 1.75709615      | 0.768422291 | 0.59427491  | 1.293041786 |
| X19.1_542.03mz_pos  | (R)-AM1241                  | exact mass match     | 13839.90492 | 10689.70452 | 11501.07819 | 0.000187398  | 0.0000275    | 0.124521706  | 1.540117563     | 1.51315139      | 0.791771246 | 0.776948566 | 1.01907807  |
| X10.3_505.194mz_pos | (S)-Multifidol-2-[apiosyl-( | exact mass match     | 10268.06979 | 14535.29099 | 8224.276358 | 0.00000304   | 0.0000435    | 0.292377203  | 3.615316308     | 4.012332721     | 1.382979398 | 0.743269311 | 1.860670657 |
| X17.5_470.368mz_pos | (Z)-2-pentacos-16-enam      | exact mass match     | 1541720.215 | 1112842.585 | 1113302.922 | 4.17E-10     | 6.75E-08     | 0.685039559  | 0.869028884     | 1.211919695     | 0.665229088 | 0.654200409 | 1.016858258 |
| X15.7_456.352mz_pos | (Z)-2-tetracos-15-enamid    | exact mass match     | 914827.0994 | 669049.7222 | 578207.027  | 3.99E-10     | 3.99E-10     | 0.032418565  | 0.418785076     | 0.873093345     | 0.66058611  | 0.539320574 | 1.224848712 |
| X14.3_329.233mz_neg | (Z)-5,8,11-trihydroxyoctad  | MS/MS spectrum match | 23391.65438 | 4700.138831 | 6893.331033 | 3.99E-10     | 4.06E-10     | 0.998593315  | 0.734687355     | 2.734289476     | 0.264405313 | 0.298388796 | 0.886110057 |
| X26.3_514.705mz_pos | (des-Gly-NH2)-Argβ-Va       | exact mass match     | 58954.23862 | 47623.94754 | 31991.28776 | 1.72E-09     | 3.99E-10     | 0.00000488   | 0.887991852     | 2.109944        | 0.786544048 | 0.494575448 | 1.590341881 |
| X7.4_461.196mz_pos  | (6-Acetoxy-7-(chloromethyl  | exact mass match     | 12066.52463 | 17821.67127 | 7037.00706  | 0.00000921   | 5.19E-09     | 0.001743429  | 12.56187005     | 8.351417788     | 1.436937087 | 0.553086768 | 2.598031938 |
| X22.1_471.004mz_pos | (1-(2,4-Dichlorophenyl)-2-  | exact mass match     | 56381.39632 | 44502.78039 | 30959.61396 | 4.14E-10     | 3.99E-10     | 0.000657242  | 0.969642274     | 1.655607854     | 0.769882315 | 0.50166789  | 1.534645392 |
| X26.2_848.629mz_pos | 1-(2E,6E-phytyadienyl)-2-(  | exact mass match     | 391197.9318 | 272991.3841 | 220232.0235 | 3.99E-10     | 3.99E-10     | 0.001260118  | 0.321296523     | 1.59319371      | 0.651961453 | 0.484717969 | 1.345032564 |
| X7.2_744.501mz_pos  | 1-(6-[5]-ladderane-hexan    | exact mass match     | 58212.88359 | 20344.06023 | 16941.07618 | 5.8E-10      | 0.000000293  | 0.688047446  | 1.116039125     | 2.349430668     | 0.35885376  | 0.269034778 | 1.333856397 |
| X16.7_778.551mz_pos | 1-(8-[5]-ladderane-octan    | exact mass match     | 284763.3151 | 198505.2832 | 176867.2336 | 3.99E-10     | 3.99E-10     | 0.006982728  | 0.295853122     | 1.130526924     | 0.645267598 | 0.539044479 | 1.197058171 |
| X16.5_822.578mz_pos | 1-(8-[5]-ladderane-octan    | exact mass match     | 33376.57516 | 22110.9712  | 19406.84485 | 3.99E-10     | 3.99E-10     | 0.013617049  | 0.303285778     | 1.504875559     | 0.668207154 | 0.539273705 | 1.239087217 |
| X22.9_715.519mz_pos | 1-(O-alpha-D-glucopyran     | exact mass match     | 50245.21063 | 38147.52833 | 36806.61214 | 1.61E-09     | 1.64E-09     | 0.047439362  | 1.486759725     | 1.955617727     | 0.737649139 | 0.654686491 | 1.126721185 |
| X17.9_775.54mz_pos  | 1,2-di-(9Z,12Z,15Z)-octade  | exact mass match     | 89183.85876 | 60018.2244  | 69117.56912 | 3.99E-10     | 3.99E-10     | 0.001776808  | 1.414861814     | 1.385130578     | 0.639182096 | 0.670567659 | 0.95319553  |
| X15.9_447.806mz_pos | 1,2,3,4,6,7,8-Heptachloroc  | exact mass match     | 7098.001182 | 4970.489235 | 5209.674882 | 0.00000106   | 1.97E-09     | 0.008199487  | 0.761805982     | 4.028440188     | 0.782156344 | 0.704316829 | 1.110517756 |
| X6.8_326.253mz_pos  | 1,2,3-Tris(1-ethoxyethoxy)  | exact mass match     | 143458.3827 | 141128.6631 | 91529.16404 | 3.99E-10     | 4E-10        | 0.011970207  | 1.93022627      | 1.488043386     | 0.663452782 | 0.550567111 | 1.20503526  |
| X8.6_208.073mz_pos  | 1,2,4-Triazolol[4,3-a]pyrid | exact mass match     | 15083.93153 | 8850.525113 | 11917.94535 | 0.000259009  | 0.001530194  | 0.662066759  | 2.190461061     | 2.322421687     | 0.629665027 | 0.704246466 | 0.894097531 |
| X20.1_723.486mz_pos | 1,26-Dicaffeoylhexacosan    | exact mass match     | 176311.9344 | 121292.8809 | 156319.0252 | 3.99E-10     | 3.99E-10     | 0.077374897  | 1.727010774     | 2.550051883     | 0.643953558 | 0.769519291 | 0.836828089 |
| X28.5_150.002mz_neg | 1,2-Benzisothiazol-(3,2H)-  | exact mass match     | 14441.17101 | 90295.82037 | 106319.3668 | 3.99E-10     | 4.97E-10     | 0.333541554  | 1.113873426     | 1.142490098     | 5.994711572 | 6.283797138 | 0.953995083 |
| X15.7_287.186mz_neg | 1,2-Dihexanoyl-sn-glycer    | exact mass match     | 6336.906579 | 3559.391053 | 4594.014677 | 0.000176849  | 0.000596874  | 0.52531918   | 1.127243807     | 4.324910384     | 0.695608489 | 0.669882884 | 1.038403139 |
| X14.7_359.058mz_pos | 1,2-Glycerol dinitrate gluc | exact mass match     | 12251.93067 | 7760.521706 | 5557.277127 | 0.0000507    | 0.004965976  | 0.98505884   | 2.906042748     | 3.387978596     | 0.665648981 | 0.439437677 | 1.514774483 |
| X15_476.299mz_pos   | 10-Deoxymethylmycin         | exact mass match     | 5885.348673 | 13219.61069 | 8762.396788 | 0.000100097  | 0.000940998  | 0.68140257   | 3.198066655     | 1.214359722     | 2.109204605 | 1.293012464 | 1.631233003 |
| X18.2_311.223mz_neg | 10-hydroperoxy-8E,12Z-d     | exact mass match     | 5063.170423 | 8679.332009 | 18142.25467 | 0.002400476  | 0.000228448  | 0.141814414  | 4.997379095     | 6.689255249     | 1.666344498 | 2.686069856 | 0.620365287 |
| X20.2_499.307mz_neg | 11-Deoxocurbitacin I        | exact mass match     | 4065.241461 | 8295.740168 | 9158.779055 | 0.000000476  | 0.000702485  | 0.999836788  | 3.16683007      | 2.286369472     | 1.854277751 | 1.699326074 | 1.091184193 |
| X9.1_548.363mz_pos  | 11-KETOROCOGENIN A          | exact mass match     | 5291.983662 | 3340.963914 | 2202.407209 | 0.000053     | 3.99E-10     | 2.68E-08     | 0.817116117     | 7.311112797     | 0.751158781 | 0.420239499 | 1.787454015 |
| X14.5_530.389mz_pos | 11-OXOIRSOLIC ACID A        | exact mass match     | 592116.5201 | 436257.8408 | 400555.272  | 3.99E-10     | 3.99E-10     | 0.039757223  | 0.565335518     | 0.826351643     | 0.66783221  | 0.582449258 | 1.146592945 |

|                     |                               |                      |             |             |             |             |             |              |             |             |             |              |             |
|---------------------|-------------------------------|----------------------|-------------|-------------|-------------|-------------|-------------|--------------|-------------|-------------|-------------|--------------|-------------|
| X18.3_311.223mz_neg | 12-hydroperoxy-9Z,13E-d       | exact mass match     | 4305.860679 | 7697.849797 | 14688.90263 | 0.000929524 | 0.000202302 | 0.195819394  | 3.402651825 | 6.785334145 | 1.70438976  | 2.469295422  | 0.690233232 |
| X5.7_661.428mz_pos  | 12-O-Palmitoyl-16-hydro       | exact mass match     | 6430.163581 | 1957.709238 | 2030.682587 | 0.000001133 | 0.000488252 | 0.9611712024 | 1.24090691  | 14.19047637 | 0.34752259  | 0.305734036  | 1.136682704 |
| X8.9_650.736mz_pos  | 13,17-Dimethyltritetracon     | exact mass match     | 10625.3727  | 7049.394923 | 5165.3284   | 0.00000336  | 0.000487486 | 0.68295772   | 5.53532297  | 10.00510291 | 0.706585856 | 0.482968114  | 1.46300726  |
| X28.1_483.368mz_pos | 13-beta-D-Glucosyloxyd        | exact mass match     | 209495.4434 | 139732.1143 | 160916.8388 | 4.08E-10    | 0.002925594 | 0.080463355  | 1.049839199 | 1.846689527 | 0.619672806 | 0.669303783  | 0.92584686  |
| X8.7_525.329mz_pos  | 15(S)-HETE-biotin             | exact mass match     | 24101.02013 | 15623.46535 | 14384.02687 | 4E-10       | 3.99E-10    | 0.004963082  | 1.557361846 | 3.00887842  | 0.655729321 | 0.556301978  | 1.178729084 |
| X30.6_355.228mz_neg | 16-Dehydropregnenolone        | exact mass match     | 6129.909826 | 25665.19637 | 32837.39163 | 3.99E-10    | 8.24E-10    | 0.361662155  | 1.308984371 | 1.013063562 | 3.744820086 | 4.092463242  | 0.915052834 |
| X33.6_429.159mz_neg | 17β-hydroxy Wortmannin        | exact mass match     | 99903.68964 | 129257.7167 | 153044.2159 | 0.002471367 | 0.003949029 | 0.56235936   | 1.116970096 | 1.040841562 | 1.295712248 | 1.355857518  | 0.95564042  |
| X25.5_475.341mz_pos | 18-acetoxy-1α,25-dihydro      | exact mass match     | 25147.65987 | 17405.6408  | 14119.92571 | 4.33E-10    | 1.01E-09    | 0.013573069  | 2.886307912 | 4.153587353 | 0.69385052  | 0.522063735  | 1.329053282 |
| X21.3_601.413mz_pos | 19-Methoxypomolic acid        | exact mass match     | 9667.130465 | 5358.849275 | 6909.142575 | 2.04E-09    | 4.01E-10    | 0.000602164  | 3.190131158 | 4.216566742 | 0.621651025 | 0.674054019  | 0.922256982 |
| X15.2_442.318mz_pos | 1b,3a,7a,12a-Tetrahydrox      | exact mass match     | 22781.28885 | 17816.70311 | 14052.21346 | 3.28E-09    | 8.73E-08    | 0.274385874  | 1.405586451 | 2.41431713  | 0.77927117  | 0.571668355  | 1.363152541 |
| X20.2_510.359mz_pos | 1-heptadecanoyl-2-hydr        | MS/MS spectrum match | 122310.4042 | 100429.4874 | 70564.20246 | 3.02E-08    | 4.54E-10    | 0.00141886   | 0.83353428  | 1.477246266 | 0.781130047 | 0.502785721  | 1.553604278 |
| X18.3_510.359mz_pos | 1-heptadecanoyl-sn-glyc       | exact mass match     | 41328.57911 | 31204.87845 | 23139.80057 | 1.16E-09    | 4.01E-10    | 0.000878654  | 1.032052308 | 1.217389792 | 0.751031431 | 0.518638005  | 1.448084066 |
| X35.1_577.369mz_pos | 1-Hydroxyvitamin D3-3-D       | exact mass match     | 40107.24749 | 18526.2236  | 19574.2956  | 0.000017    | 0.001832291 | 0.952910166  | 8.684007565 | 4.192429966 | 0.464930247 | 0.443697843  | 1.047853295 |
| X16.4_399.052mz_pos | 1-Methyl-2-galloyl-galact     | exact mass match     | 55993.78295 | 42064.13039 | 26777.66844 | 0.000129331 | 0.00000229  | 0.032900117  | 2.405389678 | 2.040964884 | 0.735567516 | 0.431603997  | 1.704264837 |
| X8.9_650.4mz_pos    | 1-Palmitoyl-2-(5-hydroxy      | exact mass match     | 41354.74236 | 28734.10069 | 24891.89888 | 3.99E-10    | 3.99E-10    | 0.000780168  | 0.849447688 | 3.672958156 | 0.690530062 | 0.555447209  | 1.243196563 |
| X11.4_722.489mz_pos | 1-tetradecanyl-2-(8-[3]-H     | exact mass match     | 381267.3351 | 304022.5008 | 276495.5061 | 4.02E-10    | 4.13E-10    | 0.035751107  | 0.588539921 | 1.045616131 | 0.740005511 | 0.627381531  | 1.179514338 |
| X12.4_486.363mz_pos | 1α,25-dihydroxy-11-(3-h       | exact mass match     | 52635.07907 | 39186.97759 | 33764.8404  | 4.17E-10    | 5.34E-10    | 0.065026498  | 0.735188712 | 1.339905676 | 0.728303711 | 0.581873146  | 1.251653761 |
| X15.2_550.373mz_pos | 1α,25-dihydroxy-22-oxav       | exact mass match     | 16614.06022 | 10740.54052 | 10261.83568 | 1.04E-08    | 0.000000296 | 0.322455189  | 2.054227676 | 3.984484186 | 0.662318939 | 0.580567507  | 1.140812965 |
| X25.4_541.37mz_pos  | 1α,25-dihydroxy-25,25-di      | exact mass match     | 185553.3603 | 149195.1098 | 159781.752  | 5.65E-10    | 4.36E-10    | 0.013127749  | 0.602346095 | 1.272943955 | 0.750751952 | 0.756995945  | 0.991751616 |
| X30.4_530.368mz_pos | 2-(8-[3]-ladderane-octan      | exact mass match     | 261229.8523 | 192001.5591 | 180656.4139 | 4.83E-08    | 0.000110078 | 0.987255433  | 4.093381401 | 1.792217526 | 0.680041863 | 0.604473774  | 1.125014668 |
| X16.7_629.446mz_pos | 2-(9R-(15Z)-docosenoylo       | exact mass match     | 58279.26633 | 40177.22982 | 44464.08735 | 3.99E-10    | 3.99E-10    | 0.0000182    | 1.583689022 | 1.483819398 | 0.668470687 | 0.669568449  | 0.998360493 |
| X24.8_504.691mz_pos | 2,2',4,5'-Tetrabromodiphe     | exact mass match     | 54781.18719 | 42277.37796 | 33182.49598 | 6.27E-10    | 3.99E-10    | 0.00000324   | 0.440825386 | 1.761897217 | 0.754112033 | 0.550436415  | 1.370025697 |
| X13.4_343.211mz_pos | 2,3-dinor, 6-keto-PGF1α       | exact mass match     | 3126.002783 | 26999.97613 | 28448.68655 | 0.0000103   | 0.003108296 | 0.999330453  | 5.73381753  | 1.358644524 | 6.22604859  | 6.119212419  | 1.017459137 |
| X16.8_327.216mz_pos | 2,3-Dinor-11b-PGF2a           | exact mass match     | 13693.4327  | 25196.27472 | 26969.33791 | 0.000108144 | 0.00000094  | 0.019966876  | 2.245939944 | 1.357980504 | 1.745650566 | 1.735055033  | 1.006119268 |
| X18.9_341.233mz_neg | 2,3-Dinor-TXB1                | exact mass match     | 15862.78327 | 5503.47846  | 10310.79453 | 3.99E-10    | 0.000605969 | 0.058673164  | 2.798822661 | 3.949520047 | 0.421169175 | 0.502535993  | 0.710773359 |
| X21.9_489.338mz_pos | 2,3-epoxyphyloquinone         | exact mass match     | 42514.18532 | 33381.0583  | 36641.41646 | 0.000000129 | 7.99E-10    | 0.002849027  | 1.153036885 | 1.69035611  | 0.774328427 | 0.777888075  | 0.995423958 |
| X18.2_514.017mz_pos | 2,5-Diamino-6-(5'-triphos     | exact mass match     | 16483.10223 | 12592.80659 | 11669.41389 | 0.000001178 | 0.00000118  | 0.131403788  | 1.999435081 | 3.333977291 | 0.771347025 | 0.65885004   | 1.170747481 |
| X7.2_153.092mz_neg  | 2,6-nonadienoic acid          | exact mass match     | 21444.75996 | 14284.63665 | 11948.86327 | 0.00076858  | 0.001277486 | 0.48919605   | 2.167769949 | 1.677091998 | 0.719887263 | 0.51140468   | 1.074666554 |
| X23_509.019mz_pos   | 2,7-Dichlorodihydrofluor      | exact mass match     | 31536.86429 | 23824.466   | 25000.94231 | 0.000000728 | 0.000000697 | 0.136508001  | 0.615172924 | 2.252284305 | 0.756098658 | 0.728556269  | 1.037804066 |
| X6.7_588.375mz_pos  | 2-[2-[(19-Acetamido-16,1      | exact mass match     | 36104.14791 | 11531.65658 | 12029.29501 | 6.62E-09    | 0.000000402 | 0.041556909  | 1.382213894 | 2.05380845  | 0.345298346 | 0.307861048  | 1.121604532 |
| X10.6_708.473mz_pos | 2-[6-[5-Hydroxy-3-(2-hy)      | exact mass match     | 253778.24   | 212051.0251 | 181794.6211 | 2.24E-09    | 3.31E-08    | 0.207270878  | 0.873351055 | 1.971957382 | 0.775281236 | 0.62314048   | 1.244151618 |
| X18.9_597.407mz_pos | 24Z-ethylidene-cholest-5      | exact mass match     | 13354.5312  | 10417.16367 | 7665.306768 | 0.0000222   | 6.77E-09    | 0.0012885    | 1.914997642 | 4.242982077 | 0.798953296 | 0.550564599  | 1.451152685 |
| X26.3_514.37mz_pos  | 25-Hydroxy-24-epi-brass       | exact mass match     | 179966.0944 | 137152.047  | 98311.68968 | 3.99E-10    | 3.99E-10    | 0.000243156  | 0.774623156 | 1.429822839 | 0.713963776 | 0.47360542   | 1.507507612 |
| X17.3_514.395mz_pos | 26,27-diethyl-1α,25-dihy      | exact mass match     | 2152165.581 | 1583385.893 | 1486733.164 | 4E-10       | 1.06E-09    | 0.328714854  | 0.571230554 | 1.063205734 | 0.678139864 | 0.629963828  | 1.07647429  |
| X17.5_446.289mz_pos | 2-Angeloyl-9-(3-methyl-)      | exact mass match     | 4540.275933 | 11160.56407 | 12161.21188 | 0.0000495   | 0.000170163 | 0.447626635  | 3.390391704 | 1.468451401 | 2.158997307 | 2.142226859  | 1.007828512 |
| X14.6_662.468mz_pos | 2-carboxy-2-amino-3-O-        | exact mass match     | 175651.7247 | 126087.5843 | 119100.6983 | 3.99E-10    | 3.99E-10    | 0.024270611  | 0.384041601 | 1.09811425  | 0.668044968 | 0.586550815  | 1.138937925 |
| X21.5_515.03mz_pos  | 2'-Deoxy-5-hydroxymeth        | exact mass match     | 270998.6743 | 228606.7424 | 188769.234  | 0.00000025  | 0.000000224 | 0.110954318  | 0.531178382 | 0.93243685  | 0.785290907 | 0.608486838  | 1.290563506 |
| X16.1_412.326mz_pos | 2-docosanamidoethanesul       | exact mass match     | 145475.0576 | 106591.7285 | 91473.41753 | 4.01E-10    | 3.99E-10    | 0.002748238  | 1.418143122 | 0.748057437 | 0.690501405 | 0.54030554   | 1.277983204 |
| X26.6_427.268mz_pos | 2-glyceryl-PGD2               | exact mass match     | 21330.50775 | 14409.31864 | 15821.07909 | 0.0000172   | 0.0000226   | 0.25901201   | 1.518015993 | 3.431419344 | 0.677428414 | 0.678467296  | 0.998468781 |
| X49.2_381.337mz_neg | 2-hydroxy-15Z-tetracosel      | exact mass match     | 13771.8846  | 25238.38324 | 49556.7157  | 0.000382488 | 0.003896058 | 0.799625822  | 3.928781138 | 3.854854595 | 1.779504656 | 3.047814898  | 0.583862444 |
| X38.9_315.288mz_pos | 2-hydroxy-nonadecanoic        | exact mass match     | 33385.93058 | 54513.17969 | 117786.0858 | 0.000431305 | 0.001262144 | 0.559685693  | 2.259889012 | 2.612178912 | 1.543649559 | 2.999942735  | 0.514559675 |
| X18.1_539.71mz_pos  | 2-Hydroxyphytanoyl-CoA        | exact mass match     | 81953.51182 | 64129.14522 | 53234.66914 | 1.27E-09    | 1.97E-09    | 0.060750028  | 0.795797097 | 0.98864077  | 0.750247743 | 0.568842872  | 1.318901545 |
| X34.4_165.979mz_neg | 2-Mercaptobenzothiazole       | exact mass match     | 213.8743864 | 1308.799008 | 2158.413238 | 7.19E-08    | 0.001526405 | 0.836387307  | 11.44752797 | 6.929486453 | 4.443474084 | 4.660488779  | 0.953435207 |
| X16.4_369.049mz_pos | 2-O-Caffeoylhydroxycitric     | exact mass match     | 32718.23548 | 20893.24297 | 11970.60228 | 0.000230906 | 0.001341105 | 0.64995002   | 2.835763932 | 2.821486933 | 0.689522275 | 0.348816413  | 1.976748366 |
| X24.5_524.708mz_pos | 2S-Pristanoyl-CoA             | exact mass match     | 249505.0657 | 209087.2478 | 148131.0953 | 1.26E-09    | 4.01E-10    | 0.000748233  | 0.747489423 | 1.400208468 | 0.780241399 | 0.521930156  | 1.494915346 |
| X20.3_440.358mz_pos | 2-tetracosanamidoethanes      | exact mass match     | 59826.97622 | 42485.38807 | 29435.78727 | 4.72E-10    | 3.99E-10    | 0.000505687  | 0.729675687 | 1.370476992 | 0.696904421 | 0.448311632  | 1.554508899 |
| X17.8_426.342mz_pos | 2-tricosanamidoethanesul      | exact mass match     | 350504.315  | 257006.2958 | 195734.0945 | 4.25E-10    | 4.05E-10    | 0.009386705  | 0.721735602 | 0.814417254 | 0.688567872 | 0.4892718457 | 1.407485475 |
| X14.9_313.202mz_neg | 2-Undecyl-4(1H)-quinolin      | exact mass match     | 6478.425965 | 17832.98385 | 20601.86977 | 0.00000352  | 0.000714007 | 0.946273839  | 0.843657168 | 0.739998542 | 2.597680028 | 2.551528599  | 1.018087757 |
| X21.3_533.364mz_pos | 2α-(benzyloxy)-1α,25-dih      | exact mass match     | 64435.69901 | 52729.16283 | 54431.56652 | 0.00000967  | 0.0000026   | 0.107964758  | 0.624225322 | 1.510303281 | 0.789865901 | 0.742705955  | 1.063497467 |
| X14.3_442.337mz_pos | 2α-Fluoro-19-nor-22-oxi       | exact mass match     | 572977.4451 | 432362.4619 | 405889.29   | 3.99E-10    | 3.99E-10    | 0.03217799   | 0.41997006  | 0.947013425 | 0.688005724 | 0.608150448  | 1.131308422 |
| X17.8_657.112mz_pos | 3'-(2'',3''-Digalloyl)glucosy | exact mass match     | 13656.6401  | 10062.59038 | 7309.712105 | 0.00000575  | 0.003445402 | 0.994261157  | 3.37740977  | 5.929380019 | 0.758566505 | 0.516536353  | 1.468563639 |
| X16.1_593.356mz_pos | 3,14,25-Trihydroxy-2,10,1     | exact mass match     | 1517.341789 | 5072.032705 | 6240.440407 | 0.0000182   | 0.0019457   |              |             |             |             |              |             |

|                     |                             |                      |              |              |             |             |             |               |             |             |             |             |             |
|---------------------|-----------------------------|----------------------|--------------|--------------|-------------|-------------|-------------|---------------|-------------|-------------|-------------|-------------|-------------|
| X29.3 319.264mz_neg | 3,7,11,15-Tetramethylhexyl  | exact mass match     | 21465.21929  | 10591.33726  | 12358.25876 | 2.66E-08    | 0.000224763 | 0.987906466   | 2.837269658 | 2.902809047 | 0.538142393 | 0.527853885 | 1.019491205 |
| X18 592.735mz_pos   | 3a,7a-Dihydroxy-5b-chole    | exact mass match     | 15647.28892  | 11113.88126  | 6964.01185  | 0.00000158  | 0.000618865 | 0.972820364   | 4.184349758 | 3.401437751 | 0.725363506 | 0.430435528 | 1.685185025 |
| X13.7 544.404mz_pos | 3alpha-Acetomethoxy-11      | exact mass match     | 26966.71172  | 19689.93683  | 15755.60298 | 0.000389437 | 0.00003353  | 0.105942629   | 0.854208283 | 2.880907672 | 0.730992643 | 0.540145731 | 1.353324855 |
| X22.4 439.302mz_pos | 3beta-(3-methyl-butanoyl    | exact mass match     | 7164.48903   | 4426.137375  | 4836.080945 | 2.91E-08    | 4.04E-10    | 0.000225229   | 1.816408318 | 5.233060042 | 0.713214506 | 0.658351644 | 1.083333676 |
| X14.6 557.389mz_pos | 3beta.15alpha-Diacetoxyl    | exact mass match     | 113519.3635  | 81387.46113  | 98812.59102 | 3.99E-10    | 4E-10       | 0.024232515   | 1.103453533 | 1.478498983 | 0.673583653 | 0.751388542 | 0.896451856 |
| X27.5 549.061mz_pos | 3-carboxy-1-hydroxyprop     | exact mass match     | 80347.92818  | 59062.60285  | 38206.13762 | 7.05E-10    | 4E-10       | 0.000655543   | 1.411419301 | 2.131461659 | 0.706932045 | 0.426044566 | 1.659291305 |
| X24.7 729.535mz_pos | 3-dodecanoyl-NBD Chole      | exact mass match     | 557479.3334  | 426205.875   | 446935.2165 | 4.02E-10    | 4E-10       | 0.00917566    | 0.641897861 | 1.273800489 | 0.700997579 | 0.684654888 | 1.023869699 |
| X19.9 605.403mz_pos | 3-Epipapyriferic acid       | exact mass match     | 24657.24796  | 17740.47522  | 16648.84064 | 0.00000121  | 0.000000139 | 0.046955753   | 0.841924115 | 1.185663053 | 0.72467897  | 0.630669019 | 1.149063848 |
| X13 645.441mz_pos   | 3-hexanoyl-NBD Choleste     | exact mass match     | 77203.56868  | 48695.56068  | 39580.96086 | 4E-10       | 3.99E-10    | 0.002497843   | 1.480830901 | 3.150584499 | 0.607013705 | 0.455699639 | 1.332047808 |
| X24.8 585.397mz_pos | 3-Hexaprenyl-4,5-Dihydr     | exact mass match     | 729495.4561  | 618664.333   | 547935.0519 | 2.82E-08    | 1.24E-09    | 0.010056215   | 0.347499478 | 1.171669527 | 0.77682921  | 0.651389783 | 1.19257199  |
| X15.8 525.693mz_pos | 3-Hydroxyoctadecanoyl-Q     | exact mass match     | 31115.93434  | 23682.07544  | 17088.37567 | 7.83E-10    | 3.99E-10    | 0.000131933   | 1.100989243 | 2.212832871 | 0.759486757 | 0.51102898  | 1.486191169 |
| X8.9 307.05mz_pos   | 3-Hydroxyphenytoin          | exact mass match     | 21907.91261  | 6525.076782  | 2594.049516 | 0.003375581 | 0.001149482 | 0.29650248    | 4.445329485 | 6.210508172 | 0.330807465 | 0.124252335 | 2.662384298 |
| X14.5 441.248mz_pos | 3'-HydroxyPravastatin       | exact mass match     | 7562.560915  | 18897.63986  | 17396.73643 | 0.00000635  | 0.000411191 | 0.827797932   | 2.840421376 | 2.866105656 | 2.340515748 | 0.702567093 | 1.156628686 |
| X18.1 523.017mz_pos | 3'-Keto-3'-deoxy-ATP        | exact mass match     | 15548.05622  | 11955.17155  | 13335.11707 | 1.25E-08    | 6.62E-10    | 0.006840705   | 1.208841348 | 1.754471868 | 0.777958473 | 0.787909493 | 0.987370352 |
| X9.8 166.087mz_neg  | 3-Methoxytyramine           | exact mass match     | 5316.376778  | 2648.089551  | 4550.902525 | 0.00000259  | 0.0000312   | 0.478556385   | 1.975710599 | 5.529397995 | 0.662718942 | 0.755262934 | 0.877467489 |
| X1.5 165.042mz_neg  | 3-Methylxanthine            | exact mass match     | 49839.01904  | 12039.75114  | 11204.19926 | 0.00000359  | 0.000319092 | 0.596409682   | 0.339380462 | 0.754838432 | 0.285017684 | 0.264632238 | 1.077033115 |
| X12.7 618.442mz_pos | 3'-N-Acetyl-4'-O-(14-me     | exact mass match     | 575918.0696  | 423504.5863  | 402295.4816 | 3.99E-10    | 3.99E-10    | 0.068359068   | 0.536867177 | 0.711723619 | 0.668474248 | 0.602545063 | 1.109417849 |
| X25.9 616.427mz_pos | 3'-N-Acetyl-4'-O-(9-octa    | exact mass match     | 9546.061276  | 7080.658117  | 5990.22164  | 0.00497497  | 0.003512046 | 0.441743313   | 2.167525352 | 2.839098235 | 0.786311772 | 0.610683012 | 1.287593983 |
| X11.6 212.02mz_pos  | 3-NITROPHTHALIC ACID        | MS/MS spectrum match | 283498.5887  | 31963.65412  | 45100.69707 | 3.99E-10    | 3.23E-08    | 0.824986033   | 1.925677835 | 1.048051204 | 0.116926168 | 0.161871024 | 0.722341564 |
| X7.4 761.174mz_pos  | 3-O-beta-D-Galactopyra      | exact mass match     | 4568.32125   | 10035.26362  | 11435.36862 | 0.001600917 | 0.000127199 | 0.120666338   | 5.460991682 | 4.720649784 | 1.964606006 | 2.021682212 | 0.971767963 |
| X16.5 601.394mz_pos | 3-O-cis-Coumaroylmaslin     | exact mass match     | 8014.925057  | 5168.995395  | 5289.213756 | 0.0000004   | 4.98E-10    | 0.000530342   | 3.489731523 | 3.946016029 | 0.71951033  | 0.633622852 | 1.135549844 |
| X6.5 522.365mz_pos  | 3-O-L-rhamnosyl-3-hydr      | exact mass match     | 41199.28048  | 12786.06415  | 12767.79194 | 4.81E-08    | 0.000680391 | 0.92244231    | 1.469962987 | 2.88297861  | 0.316377288 | 0.283214594 | 1.117093876 |
| X16.4 412.046mz_neg | 3'-O-Methyl-(-)-epicatec    | exact mass match     | 165717.0348  | 109100.7622  | 44628.49953 | 0.0000712   | 0.0000851   | 0.305767538   | 3.730674616 | 3.592213108 | 0.691924251 | 0.249911872 | 2.768673    |
| X27.5 412.16mz_neg  | 3-O-Methylrimiterol gluc    | exact mass match     | 966.2147378  | 3226.02994   | 3196.730366 | 0.0000702   | 0.002573526 | 0.895496328   | 4.801533596 | 1.425376085 | 2.43717887  | 1.862721446 | 1.308396849 |
| X16.4 319.2mz_pos   | 3-Oxa-9-azonitricyclo[3     | exact mass match     | 7254.705197  | 14672.8257   | 14036.15549 | 0.00000303  | 0.0000814   | 0.10000814    | 1.60419488  | 1.636528697 | 1.921440133 | 1.697092126 | 1.130452265 |
| X8.5 529.664mz_pos  | 3-Oxo-OPC8-CoA              | exact mass match     | 6822.899004  | 4272.299389  | 3250.257831 | 5.95E-09    | 3.99E-10    | 0.00000145    | 2.200365048 | 7.9444735   | 0.730737138 | 0.486661856 | 1.50152951  |
| X15.1 474.644mz_pos | 3Z-dodecenoyl-CoA           | exact mass match     | 5662.39706   | 3828.696391  | 4667.311843 | 0.003339893 | 0.000205861 | 0.114711495   | 1.745539672 | 4.429981222 | 0.786842686 | 0.775140505 | 1.015096851 |
| X18.6 423.271mz_pos | 3a,7b,12a-Trihydroxy-6-g    | exact mass match     | 4034.521352  | 16332.22216  | 8659.412905 | 0.0000043   | 0.000672938 | 0.927610371   | 9.429722977 | 7.952648288 | 3.38293076  | 1.74203227  | 1.941980717 |
| X10 549.22mz_pos    | 3β-ACETOXY-23-BROMOC        | exact mass match     | 88462.84121  | 123234.28117 | 64960.54489 | 0.000567186 | 0.0000518   | 0.12528986    | 3.316119794 | 2.937158933 | 1.30294622  | 0.643957939 | 2.023340567 |
| X18 569.06mz_pos    | 4,6-Dideoxy-4-oxo-dTDP      | exact mass match     | 68912.26569  | 53704.24182  | 45628.59807 | 2.35E-09    | 0.000000918 | 0.635399505   | 0.942667806 | 1.378931224 | 0.751690729 | 0.579420831 | 1.297246875 |
| X16.7 247.17mz_neg  | 4,7,10,13-hexadecatetrae    | exact mass match     | 3035.020864  | 6779.194838  | 12945.08337 | 0.00000889  | 0.0000076   | 0.496978393   | 2.60276654  | 2.067485888 | 1.904048029 | 2.922294052 | 0.651559355 |
| X37.7 462.148mz_neg | 4-(5-amino-1-methyl-1H      | exact mass match     | 52707.99729  | 84404.70166  | 74407.53535 | 0.0000631   | 0.0000495   | 0.247992137   | 2.814843303 | 3.270793903 | 1.618184842 | 1.250075881 | 1.094462923 |
| X27.4 531.26mz_pos  | 4a,7b-Dihydroxy-3-(hydr     | exact mass match     | 32602.94925  | 25632.08277  | 20117.77482 | 4.32E-10    | 9.1E-09     | 0.342785985   | 0.723200347 | 1.83071554  | 0.778724148 | 0.770395322 | 1.218811106 |
| X25 489.347mz_pos   | 4'-Apo-3,4-didehydrolycc    | exact mass match     | 53901.17746  | 42653.7406   | 33980.50883 | 5.36E-10    | 3.99E-10    | 0.0000143     | 0.45139856  | 1.528867892 | 0.771694681 | 0.569381628 | 1.355320655 |
| X26.4 503.019mz_pos | 4-Hydroxyglucobrassicin     | exact mass match     | 33217.73651  | 25347.28828  | 24948.47493 | 6.74E-10    | 3.99E-10    | 0.000107527   | 0.714101749 | 1.277430274 | 0.760268259 | 0.689097705 | 1.103280788 |
| X16.4 381.086mz_pos | 4-Methoxybenzyl-O-(2-su     | exact mass match     | 45039.45344  | 30945.79721  | 20600.63003 | 0.000116627 | 0.0000975   | 0.279819345   | 3.903139138 | 2.622816958 | 0.680630272 | 0.421236599 | 1.615790921 |
| X16.4 364.084mz_pos | 4-Methylthiobutyl-desulf    | exact mass match     | 15465.23697  | 9365.447383  | 7507.802103 | 0.0000741   | 0.000116347 | 0.346016429   | 8.946776796 | 2.635446011 | 0.635673768 | 0.467716705 | 1.359099988 |
| X18.1 578.06mz_pos  | 4'-O-Demethylrebeccamy      | exact mass match     | 16823.32051  | 12116.90269  | 9010.059972 | 0.00000017  | 0.000000333 | 0.153278657   | 2.850183369 | 2.550223632 | 0.7334453   | 0.511665737 | 1.433446189 |
| X7.4 524.112mz_neg  | 4'-O-Methyldephinidin 3     | exact mass match     | 65201.03952  | 98155.17966  | 10493.77089 | 0.001599157 | 0.000491401 | 0.853309089   | 9.276919172 | 9.435097411 | 1.543267691 | 0.157075538 | 10.21520566 |
| X32.1 452.103mz_pos | 4-Phenylbutyl glucosinol    | exact mass match     | 30418.50064  | 57543.73353  | 62568.38352 | 0.0000268   | 0.000570002 | 0.737186692   | 3.293912579 | 4.486213476 | 1.824398297 | 1.771112673 | 1.03008596  |
| X12.1 268.167mz_pos | 4-Piperidinmethanol, a,a    | exact mass match     | 26531.22244  | 10984.9061   | 7026.845769 | 0.0000677   | 0.00000244  | 0.046444879   | 7.678964606 | 7.107482464 | 0.443227432 | 0.248845522 | 1.781134853 |
| X17.7 504.339mz_pos | 4S,5R-antillatoxin A        | exact mass match     | 6124.725207  | 4134.949834  | 4718.32068  | 0.000150625 | 1.54E-09    | 0.0000878     | 2.553427905 | 8.069360209 | 0.777444912 | 0.735966631 | 1.056358914 |
| X27.2 563.068mz_pos | 5,7,2',3',4'-Pentahydroxy-9 | exact mass match     | 127826.6749  | 105740.2173  | 67409.38129 | 7.73E-09    | 4E-10       | 0.000175105   | 1.225306052 | 2.103839128 | 0.78356593  | 0.459476954 | 1.705343267 |
| X15.8 329.233mz_neg | 5,8,12-trihydroxy-9-octad   | exact mass match     | 16009.28642  | 2546.475325  | 3963.17829  | 3.99E-10    | 4.03E-10    | 0.990533214   | 0.659973464 | 4.396005362 | 0.238674511 | 0.267936195 | 0.890788611 |
| X1 197.068mz_neg    | 5-Acetylamino-6-amino-1     | exact mass match     | 19266.12133  | 7937.270052  | 8973.06363  | 0.000989544 | 0.001282599 | 0.458379874   | 0.523986114 | 1.978630877 | 0.487736351 | 0.489330868 | 0.996741434 |
| X26.7 502.015mz_pos | 5-Azacytidine 5'-triphosp   | exact mass match     | 10276.8588   | 7468.872471  | 7563.104929 | 3.98E-09    | 3.99E-10    | 4.91E-08      | 1.824348998 | 4.144736822 | 0.764503704 | 0.699114283 | 1.093531805 |
| X9.7 641.069mz_pos  | 5-Carboxypyranocyanidin     | exact mass match     | 84079.948834 | 61838.89966  | 37840.85134 | 3.99E-10    | 3.99E-10    | 0.01652262    | 4.426014468 | 3.717289765 | 0.707330818 | 0.402587539 | 1.756961529 |
| X16.3 354.263mz_pos | 5-Hydroperoxy-6-trans-8     | exact mass match     | 1868.263081  | 7149.075314  | 5221.64663  | 0.0000229   | 0.001331929 | 0.892784728   | 5.898606348 | 5.418202431 | 2.732631559 | 1.848601445 | 1.478215635 |
| X37.7 426.171mz_neg | 5-hydroxyfluvastatin        | exact mass match     | 73728.27568  | 119966.6132  | 131128.8101 | 0.0000924   | 0.0000714   | 0.260759186   | 2.979286487 | 2.644021767 | 1.629083845 | 1.565075508 | 1.040897923 |
| X19.1 568.39mz_pos  | 5-O-β-D-Mycaminosyltyl      | exact mass match     | 12993.98442  | 9924.759578  | 7167.849047 | 0.00000468  | 0.0000132   | 0.2984289     | 2.139049875 | 3.061359802 | 0.784535155 | 0.528973862 | 1.483126504 |
| X19.4 524.03mz_pos  | 6-(3'-Triphosphoryl-1'-m    | exact mass match     | 9418.226149  | 5590.568972  | 4390.084528 | 0.000000854 | 3.05E-08    | 0.021475631   | 2.812283217 | 4.034526183 | 0.656322907 | 0.469517926 | 1.397865493 |
| X23 520.037mz_pos   | 6-(Methylsulfonyl)hexyl gl  | exact mass match     | 258558.0128  | 222171.5666  | 173327.0016 | 4.68E-09    | 4.73E-10    | 0.004710575   | 0.753337931 | 1.72034273  | 0.795676954 | 0.588283253 | 1.352540549 |
| X23.1 660.119mz_pos | 6-(N-Acetyl-alpha-D-glu     | exact mass match     | 10620.54554  | 7882.774542  | 5203.312879 | 0.001448758 | 0.003913201 | 0.633719325   | 5.106900578 | 8.051958323 | 0.782336239 | 0.485510232 | 1.611369212 |
| X8.4 488.307mz_pos  | 6-bromo-5,9-hexacosadi      | exact mass match     | 15685.95529  | 10548.18919  | 9319.66859  | 3.99E-10    | 3.99E-10    | 0.003282733   | 0.511671627 | 2.712639041 | 0.69061643  | 0.562821296 | 1.227061652 |
| X28.5 391.157mz_pos | 6-Butyryl-5-hydroxy-4-p     | exact mass match     | 5654.463974  | 361177.9533  | 25970.21846 | 3.99E-10    | 4.82E-10    | 0.739929071   | 6.987475306 | 1.765569133 | 5.543506894 | 3.724369151 | 1.488441846 |
| X22.8 553.047mz_pos | 6-desmethylgriseofulvin g   | exact mass match     | 16579.62608  | 11403.67745  | 9084.362781 | 0.0000323   | 0.0000211   | 0.205659692</ |             |             |             |             |             |



|                     |                            |                      |             |             |             |             |             |             |             |             |              |             |             |
|---------------------|----------------------------|----------------------|-------------|-------------|-------------|-------------|-------------|-------------|-------------|-------------|--------------|-------------|-------------|
| X39.2_407.19mz_neg  | 6-Hydroxydexamethasone     | exact mass match     | 7779.166893 | 14877.48579 | 19268.49947 | 0.003316107 | 0.001106944 | 0.292826099 | 5.032706569 | 5.618884025 | 1.802626935  | 1.982935671 | 0.904069801 |
| X14.6_388.268mz_pos | 6-Keto-PGF1 $\alpha$       | exact mass match     | 10546.25369 | 16943.58454 | 19324.09114 | 6.25E-10    | 0.0000075   | 0.833013873 | 4.541991127 | 4.079752516 | 1.558885534  | 1.626141585 | 0.958640716 |
| X23.2_494.01mz_pos  | 6-Methoxyluteolin 3',4'-di | exact mass match     | 63442.92079 | 48827.33342 | 49944.38062 | 8E-10       | 4.08E-10    | 0.003420955 | 0.816782194 | 0.894060531 | 0.741273705  | 0.69184848  | 1.071439379 |
| X33.8_359.305mz_pos | 6Z,9Z-Tricosadiene         | exact mass match     | 7612.650144 | 14552.03903 | 35871.60542 | 0.000959517 | 0.002688238 | 6.1017603   | 4.993043009 | 3.208199202 | 1.846129775  | 3.884515701 | 1.475253524 |
| X28.2_595.382mz_pos | 7,8-Didehydroastaxanthin   | exact mass match     | 48811.99115 | 75921.96818 | 44090.13626 | 0.000143639 | 0.000954531 | 0.640925474 | 7.756528385 | 5.593383861 | 1.469353452  | 0.879100008 | 1.842426349 |
| X21.6_489.003mz_pos | 7',8'-Dihydro-8'-hydroxy   | exact mass match     | 36775.32413 | 28978.07599 | 29675.08581 | 0.000000128 | 4E-10       | 0.0000248   | 1.072280139 | 1.430084545 | 0.779759153  | 0.732789936 | 1.064096427 |
| X25_497.009mz_pos   | 7-methylguanosine 5'-diph  | exact mass match     | 42262.25682 | 31498.82535 | 31138.24407 | 4.14E-10    | 3.99E-10    | 0.000128715 | 5.424174527 | 3.926547181 | 0.735894772  | 0.67109105  | 1.096564724 |
| X17.2_660.945mz_pos | 8-Hydroxyapigenin 8-(2''   | exact mass match     | 13696.21545 | 9459.031892 | 10120.35715 | 0.000000104 | 0.000941673 | 0.931631415 | 0.002392946 | 1.732733446 | 0.712494362  | 0.689676913 | 1.033084259 |
| X19.3_545.049mz_pos | 8-Hydroxyluteolin 8-gluc   | exact mass match     | 16280.298   | 10085.53849 | 7774.305734 | 0.000000191 | 0.000000153 | 0.290290413 | 2.867797104 | 3.392919638 | 0.640395199  | 0.458479177 | 1.396781429 |
| X18.1_548.709mz_pos | 8Z,11Z,14Z-eicosatrienoyl  | exact mass match     | 31748.27318 | 23153.83461 | 16854.86985 | 4.16E-09    | 6.85E-09    | 0.076387864 | 1.914194343 | 2.208981067 | 0.728724752  | 0.494064468 | 1.474958835 |
| X9.1_618.891mz_pos  | 9,10,12,13-tetrabromo-st   | exact mass match     | 9901.133834 | 4739.572268 | 4389.255532 | 3.99E-10    | 4E-10       | 0.124000205 | 2.384117024 | 5.411841681 | 0.557035088  | 0.445283685 | 1.250966759 |
| X14.8_329.233mz_neg | 9,10,13-trihydroxy-11-oc   | exact mass match     | 9448.58364  | 4327.394413 | 7208.156678 | 4.27E-08    | 0.001455056 | 0.798872314 | 0.773507381 | 2.274484522 | 0.57395857   | 0.702331888 | 0.817214596 |
| X7.3_342.248mz_pos  | 9a-Fluoro-B-hydroxyandri   | exact mass match     | 502370.1503 | 370732.1204 | 368860.9394 | 3.99E-10    | 3.99E-10    | 0.075069286 | 1.222154988 | 1.036195239 | 0.671758654  | 0.632673156 | 1.061778342 |
| X28.7_311.223mz_neg | 9-hydroperoxy-10E,12-oc    | exact mass match     | 42195.1966  | 15807.86316 | 17847.30057 | 0.0000252   | 0.001460197 | 0.898033489 | 1.053921518 | 1.116878585 | 0.41558844   | 0.686791295 | 1.074451378 |
| X10.8_300.216mz_pos | AcAr 9:1                   | MS/MS spectrum match | 146420.2288 | 113359.8661 | 118695.4936 | 0.003570834 | 0.004785157 | 0.055171104 | 1.035734306 | 1.6017336   | 0.726139971  | 0.702888879 | 1.033078321 |
| X17.2_579.732mz_pos | ACETRIAZOIC ACID           | exact mass match     | 10087.12938 | 7489.358887 | 6045.758887 | 0.00057715  | 0.00000122  | 0.009111493 | 2.127196982 | 2.884215944 | 0.777430702  | 0.579360986 | 1.341876171 |
| X14.7_513.362mz_pos | Acetyl-11-keto-B-Boswel    | exact mass match     | 30069.69688 | 19471.43507 | 18272.69274 | 1.22E-08    | 1.12E-08    | 0.066802028 | 2.134832052 | 1.420375847 | 0.649559085  | 0.560926806 | 1.158010417 |
| X27.1_548.392mz_pos | Acinosisperigenin A        | exact mass match     | 54911.28567 | 45005.18931 | 29124.22505 | 0.000119572 | 0.000000184 | 0.02962475  | 2.945859065 | 2.254516393 | 0.799641033  | 0.484933514 | 1.648970446 |
| X20.8_657.12mz_pos  | Actinorhodin               | exact mass match     | 12751.90206 | 8925.178099 | 4469.968123 | 0.00000829  | 0.004734218 | 0.988354104 | 4.76784643  | 6.662540495 | 0.732595548  | 0.354737133 | 2.065178637 |
| X22_465.997mz_pos   | Acyclovir triphosphate     | exact mass match     | 12632.0355  | 8140.682119 | 6257.637462 | 1.05E-09    | 4.31E-10    | 0.006470216 | 3.202754599 | 6.581896871 | 0.674574477  | 0.483688321 | 1.394647025 |
| X18.2_525.034mz_pos | Adenosine triphosphate (A  | exact mass match     | 80413.6574  | 61477.66887 | 50370.16984 | 4.1E-10     | 4.02E-10    | 0.008398298 | 1.829014997 | 2.151561013 | 0.734218007  | 0.549215895 | 1.336847702 |
| X15.7_500.379mz_pos | Adlupone                   | exact mass match     | 1546437.221 | 1138536.614 | 1083377.949 | 3.99E-10    | 4.01E-10    | 0.259107982 | 0.42563522  | 0.805723533 | 0.671448663  | 0.632580988 | 1.061443003 |
| X15.2_521.021mz_pos | Aerophobin 2               | exact mass match     | 16523.21851 | 12138.16942 | 10058.63439 | 6.59E-09    | 0.000005533 | 0.796234709 | 1.546747863 | 2.31777556  | 0.747436532  | 0.572193689 | 1.3062649   |
| X7.4_481.154mz_pos  | a-L-Fucopyranosyl-(1->2    | exact mass match     | 63694.24496 | 96290.93072 | 43951.58945 | 0.000112097 | 0.000303453 | 0.456169951 | 3.678724057 | 3.768153925 | 1.422493462  | 0.608798006 | 2.336560646 |
| X8.7_383.034mz_pos  | Alginic acid               | exact mass match     | 9998.008752 | 5596.711712 | 4696.846222 | 0.002018704 | 0.0000087   | 0.086191559 | 3.570621429 | 2.739951424 | 0.617375362  | 0.43021731  | 1.435030795 |
| X27.7_743.457mz_pos | Alliosterol 1-rhamnoside   | exact mass match     | 5083.044698 | 7654.340022 | 8751.103948 | 0.000230481 | 0.00050661  | 0.463889788 | 2.151785882 | 7.846156111 | 1.4363446398 | 1.451493719 | 0.989564322 |
| X21.7_483.328mz_pos | all-trans-Carophyll yellow | exact mass match     | 62368.83604 | 49585.25105 | 56250.05178 | 3.12E-09    | 2.68E-08    | 0.168512021 | 2.265017766 | 1.167455353 | 0.7654766    | 0.760217144 | 1.006918361 |
| X29.7_585.071mz_pos | alpha-D-Galactopyranuro    | exact mass match     | 10637.87201 | 6992.11196  | 6484.131865 | 0.000434541 | 0.00000664  | 0.035906085 | 4.210866048 | 2.302570947 | 0.702115287  | 0.619164814 | 1.133971554 |
| X19.9_422.186mz_pos | AM1235                     | exact mass match     | 3602.881908 | 8616.221108 | 8092.308983 | 0.000100931 | 0.002188004 | 0.866266893 | 4.698529189 | 2.39317366  | 2.051116356  | 1.736412968 | 1.18123764  |
| X13.6_306.19mz_pos  | AMIPRILOSE                 | exact mass match     | 4438.48227  | 8547.029892 | 8191.009018 | 0.000000231 | 0.001530126 | 0.923444695 | 2.779788274 | 3.207511042 | 1.752999278  | 1.536513752 | 1.140893973 |
| X16.3_258.177mz_pos | amitraz                    | exact mass match     | 27210.28616 | 46712.96854 | 47836.19856 | 0.00000523  | 0.00479234  | 0.971112032 | 0.822446404 | 0.881393743 | 1.622462696  | 1.524194835 | 1.064471981 |
| X13.2_241.144mz_neg | AMPROLIUM                  | exact mass match     | 4413.475436 | 5362.035072 | 8504.586566 | 0.003086444 | 0.002451276 | 0.000000101 | 4.904019105 | 7.069253988 | 1.223922676  | 1.470376225 | 0.832387423 |
| X42.1_572.415mz_pos | Anhydroeschscholtzanthi    | exact mass match     | 14211.1121  | 28021.77491 | 32312.80263 | 0.000000624 | 0.002584266 | 0.921491223 | 4.216816556 | 1.256986011 | 1.883216279  | 1.962750956 | 0.959477958 |
| X42.3_572.415mz_pos | Anhydroeschscholtzanthi    | exact mass match     | 21042.37451 | 37440.42732 | 44581.98915 | 0.0000275   | 0.0000422   | 0.297009806 | 3.564680542 | 0.743843871 | 1.69333163   | 1.838194938 | 0.92119263  |
| X11.4_705.463mz_pos | Antanapeptin C             | exact mass match     | 136439.9858 | 105986.024  | 118922.5482 | 4.09E-10    | 4.78E-10    | 0.060471002 | 0.967089277 | 1.25852693  | 0.726223411  | 0.753680639 | 0.963569148 |
| X9.7_641.404mz_pos  | Apicidin                   | exact mass match     | 44853.55175 | 33136.58002 | 23823.44644 | 3.99E-10    | 3.99E-10    | 0.016174014 | 3.242508445 | 3.856263547 | 0.730655205  | 0.49551459  | 1.474538227 |
| X12.7_323.242mz_pos | Aprindine                  | exact mass match     | 10390.13551 | 7423.167584 | 7027.067658 | 4.13E-10    | 3.99E-10    | 0.000000423 | 1.656927671 | 1.294391783 | 0.751895717  | 0.644973914 | 1.165776942 |
| X14.3_354.284mz_pos | Arachidic acid(d3)         | exact mass match     | 55549.66455 | 41822.08364 | 39289.42982 | 1.11E-09    | 6.18E-10    | 0.021277432 | 0.914338789 | 1.014420709 | 0.732887718  | 0.628168637 | 1.166705364 |
| X15.6_615.431mz_pos | Arachidonic Acid-biotin    | exact mass match     | 164938.5101 | 116241.4512 | 132514.1231 | 3.99E-10    | 3.99E-10    | 0.031632262 | 0.983611273 | 1.137482059 | 0.659503085  | 0.697937031 | 0.944932074 |
| X18.2_383.287mz_pos | Arachidonoyl 2'-Chloroet   | exact mass match     | 31705.13081 | 21052.42341 | 19710.14673 | 3.99E-10    | 3.99E-10    | 0.0000234   | 1.32057606  | 2.569797492 | 0.669467739  | 0.572616512 | 1.169138027 |
| X18.1_748.541mz_pos | Arachidonoyl thio-PC       | exact mass match     | 2434524.299 | 1701520.037 | 1619289.947 | 3.99E-10    | 4E-10       | 0.140779539 | 0.488637674 | 0.968883812 | 0.649031865  | 0.60446602  | 1.073727626 |
| X30.6_357.241mz_pos | Arachidonyl Trifluorometh  | exact mass match     | 3295.296569 | 12746.22806 | 15481.59591 | 3.99E-10    | 5.14E-10    | 0.243088635 | 4.806390762 | 1.198158377 | 3.167083717  | 3.446115504 | 0.919030054 |
| X14.9_348.237mz_pos | Arginyl-Arginine           | exact mass match     | 15723.10368 | 26550.50031 | 28427.71649 | 0.00000337  | 0.0000869   | 0.625846131 | 3.745027687 | 1.155216756 | 1.605841936  | 1.585245032 | 1.012992883 |
| X13.6_289.164mz_pos | Arginyl-Asparagine         | exact mass match     | 15129.67169 | 28169.71303 | 23813.48664 | 0.00000158  | 0.000325218 | 0.909222043 | 2.949955121 | 2.49841728  | 1.760343695  | 2.394491157 | 1.258744959 |
| X8.5_322.185mz_pos  | Arginyl-Phenylalanine      | exact mass match     | 9814.429714 | 18772.48653 | 22447.87013 | 1.25E-08    | 0.000477801 | 0.874043412 | 5.516247103 | 4.7583324   | 1.832355443  | 2.004239758 | 0.914239644 |
| X10_464.217mz_pos   | Aspergamide A; 6b-hydro    | exact mass match     | 9098.069659 | 15165.91704 | 15353.38547 | 0.001151791 | 0.002547822 | 0.574302654 | 2.351073947 | 1.053956769 | 1.622759631  | 1.528229118 | 1.061856244 |
| X17.1_583.056mz_pos | ATB-343                    | exact mass match     | 4761.612901 | 3202.144606 | 2808.546005 | 0.001188246 | 0.0000004   | 0.014571114 | 5.773320306 | 11.70399662 | 0.791480322  | 0.567600425 | 1.394432221 |
| X19.9_620.363mz_pos | Avermectin A2b aglycone    | exact mass match     | 21507.59472 | 33373.06652 | 32023.69218 | 0.00085124  | 0.0000402   | 0.080771119 | 7.661509525 | 4.977529995 | 1.478653482  | 1.310675201 | 1.128161638 |
| X22.3_732.546mz_pos | bacteriohopane-32,33,34    | exact mass match     | 1961321.012 | 1389724.511 | 1263959.366 | 3.99E-10    | 3.99E-10    | 0.092395945 | 0.248466609 | 1.031683535 | 0.652658984  | 0.587903209 | 1.110147    |
| X22.4_688.52mz_pos  | bacteriohopane-31,32,33    | exact mass match     | 47067.39258 | 32822.44117 | 25851.27706 | 4.03E-10    | 4.03E-10    | 0.016235155 | 0.888171127 | 1.68934874  | 0.693485392  | 0.506782621 | 1.368407998 |
| X19.7_614.447mz_pos | Bacteriorubixanthinal      | exact mass match     | 10182.31827 | 7369.127986 | 5974.472257 | 0.000000017 | 1.75E-09    | 0.017281643 | 1.246416327 | 2.605531565 | 0.767256612  | 0.570111785 | 1.345800301 |
| X15.7_412.325mz_pos | benzethonium               | exact mass match     | 803926.4394 | 620943.556  | 684157.4716 | 3.99E-10    | 5.59E-09    | 0.792313821 | 0.530090521 | 1.432557166 | 0.701107211  | 0.744634375 | 0.941545589 |
| X22.1_465.328mz_pos | benzethonium chloride      | exact mass match     | 73919.72358 | 53620.14315 | 50136.26226 | 3.99E-10    | 4E-10       | 0.027190353 | 0.633308528 | 1.13338886  | 0.697385201  | 0.591936556 | 1.178141802 |
| X22_453.977mz_pos   | BENZTHIAZIDE               | exact mass match     | 15655.77882 | 12273.3874  | 13633.72914 | 1.83E-08    | 4.01E-10    | 0.000131795 | 1.496470511 | 1.690392583 | 0.792017918  | 0.798616388 | 0.991737623 |
| X32.1_401.148mz_neg | Benzyl beta-primeverosid   | exact mass match     | 11328.29302 | 22325.97467 | 22202.27801 | 0.0000173   | 0.0000202   | 0.24527604  | 3.328117422 | 3.24390999  | 1.934716709  | 1.630964841 | 1.186240598 |
| X10.8_367.269mz_pos | BEPRIDIL                   | exact mass match     | 27443.73908 | 20700.11173 | 12711.83315 | 0.00000125  | 3.99E-10    | 0.000002604 | 1.407632045 | 3.183618249 | 0.754133298  | 0.432818062 | 1.742379454 |
| X12.1_394.084mz_pos | Berberine chloride         | exact mass match     |             |             |             |             |             |             |             |             |              |             |             |

|                     |                             |                  |             |             |             |             |             |              |             |             |             |             |             |
|---------------------|-----------------------------|------------------|-------------|-------------|-------------|-------------|-------------|--------------|-------------|-------------|-------------|-------------|-------------|
| X37.7_704.433mz_neg | beta1-Chaconine             | exact mass match | 47303.72374 | 79937.28659 | 139060.0576 | 0.002301321 | 0.00112474  | 0.335170954  | 1.79768479  | 2.054960634 | 1.688113138 | 2.566133569 | 0.657843052 |
| X19.1_982.687mz_pos | beta-D-Mannosylphosph       | exact mass match | 133053.0355 | 84613.86118 | 67809.9807  | 3.99E-10    | 3.99E-10    | 0.005743365  | 0.558173756 | 1.860135268 | 0.602007857 | 0.441423458 | 1.363787643 |
| X22.4_724.831mz_pos | Bisdiphosphoinositol tetra  | exact mass match | 9171.164529 | 6616.354579 | 3716.434322 | 0.000593502 | 0.000275548 | 0.26929265   | 5.211217404 | 5.385284108 | 0.776761215 | 0.41412268  | 1.875679002 |
| X37.7_382.204mz_pos | Bisphenol A dimethylacrylat | exact mass match | 354668.6942 | 511480.6217 | 898403.9558 | 0.00184973  | 0.000505649 | 0.243607939  | 1.516098243 | 1.956703549 | 1.305357549 | 2.219441588 | 1.588146837 |
| X14.3_431.12mz_pos  | Bispyribac                  | exact mass match | 7947.848155 | 10174.13371 | 6271.020917 | 0.002200925 | 0.000279706 | 0.165231618  | 5.638037089 | 4.153262452 | 1.273533502 | 0.74238127  | 1.714547141 |
| X26.2_543.102mz_neg | Bis-γ-glutamylcystine       | exact mass match | 340.314991  | 8605.702205 | 2695.606503 | 3.99E-10    | 5.02E-10    | 0.015027268  | 0           | 8.146293047 | 21.46331269 | 6.781354965 | 3.165047812 |
| X26.2_423.209mz_pos | Blasticidin S               | exact mass match | 50374.72952 | 518812.5319 | 444499.3151 | 3.99E-10    | 1.26E-08    | 0.992475604  | 5.645345917 | 0.568658054 | 9.683809901 | 7.6795731   | 1.26098284  |
| X10.2_472.311mz_pos | Borrelidin                  | exact mass match | 13157.2306  | 9333.351572 | 8735.932554 | 9.86E-10    | 0.000000634 | 0.693909772  | 0.951914788 | 2.146129576 | 0.735388515 | 0.626410394 | 1.173972401 |
| X25.6_448.98mz_pos  | butoconazole                | exact mass match | 5000.984662 | 2489.772287 | 3093.570521 | 0.00000569  | 2.66E-09    | 0.001299639  | 4.742666582 | 9.612414805 | 0.644750092 | 0.590441238 | 1.091980117 |
| X18.7_621.417mz_pos | Butyl 4'-O-hexadecanoyl     | exact mass match | 84140.54849 | 60767.80635 | 75908.67933 | 4E-10       | 3.99E-10    | 0.001013908  | 2.09222165  | 2.522206956 | 0.685531778 | 0.777975948 | 0.881173485 |
| X19.3_513.013mz_pos | C.I. Pigment Yellow 100     | exact mass match | 8184.343276 | 5704.550205 | 6083.372626 | 0.0000059   | 7.2E-09     | 0.000737374  | 1.358045342 | 2.567823807 | 0.762748644 | 0.708398659 | 1.076722316 |
| X12.8_411.295mz_pos | C19 Sphingosine-1-phosph    | exact mass match | 9128.559467 | 6669.156405 | 7357.700505 | 0.00000124  | 2.64E-08    | 0.016500059  | 2.355042449 | 2.096913147 | 0.778597348 | 0.760076584 | 1.024366972 |
| X18_836.593mz_pos   | C20 Sulfate                 | exact mass match | 1286095.317 | 903235.2766 | 829359.2682 | 3.99E-10    | 3.99E-10    | 0.126247899  | 0.522482276 | 0.950499118 | 0.650831537 | 0.589008169 | 1.104961817 |
| X17.8_880.62mz_pos  | C22-OH Sulfate              | exact mass match | 505033.0433 | 332563.3415 | 331915.3867 | 3.99E-10    | 3.99E-10    | 0.016169133  | 0.82578879  | 0.771142282 | 0.604447364 | 0.558426399 | 1.082411872 |
| X25.6_892.656mz_pos | C24 Sulfate                 | exact mass match | 946149.1274 | 648849.0734 | 620841.2296 | 3.99E-10    | 3.99E-10    | 0.007550541  | 0.544975192 | 1.182908616 | 0.616929897 | 0.563189763 | 1.095421005 |
| X22.9_453.825mz_pos | C24:1-OH Sulfate            | exact mass match | 351054.843  | 224855.2202 | 269866.0293 | 3.99E-10    | 3.99E-10    | 0.008454452  | 1.228990963 | 1.149028264 | 0.643173068 | 0.655394469 | 0.984356462 |
| X10.2_272.185mz_pos | C75                         | exact mass match | 29631.01167 | 50454.75066 | 54467.27786 | 0.00012866  | 0.003653492 | 0.896345178  | 3.365282034 | 2.410540541 | 1.618733809 | 1.602515614 | 1.01012046  |
| X16.4_253.133mz_pos | Camoensine                  | exact mass match | 39252.24237 | 25507.63867 | 26557.40172 | 0.0000088   | 0.000634461 | 0.620700876  | 1.260146487 | 0.815424858 | 0.647134919 | 0.609452728 | 1.061829556 |
| X16.2_343.263mz_pos | Cannabidiol dimethyl ethe   | exact mass match | 67010.89503 | 114259.9813 | 170781.7554 | 0.002680022 | 0.0005477   | 0.220385748  | 1.89609399  | 1.21287771  | 1.615489816 | 2.151708632 | 0.750793947 |
| X11.2_678.463mz_pos | Carbaprostacyclin-biotin    | exact mass match | 613373.1974 | 474228.8786 | 416957.0004 | 3.99E-10    | 4E-10       | 0.073201899  | 0.450166384 | 1.18385167  | 0.699500144 | 0.582228679 | 1.201418222 |
| X17.2_544.037mz_pos | Carmoisine                  | exact mass match | 28131.50894 | 22185.9172  | 19208.84479 | 0.000000051 | 2.26E-09    | 0.012903545  | 1.276458762 | 1.846810545 | 0.786203805 | 0.62926319  | 1.249476987 |
| X4.1_479.1mz_pos    | CCG-100602                  | exact mass match | 12883.00927 | 17610.65638 | 7157.276909 | 0.004860157 | 0.000540741 | 0.10704172   | 10.69683213 | 7.768594547 | 1.332607794 | 0.526494392 | 2.531095892 |
| X9.5_604.047mz_pos  | CDP-glucose                 | exact mass match | 83059.89357 | 60936.47058 | 47676.23278 | 3.99E-10    | 3.99E-10    | 0.000204026  | 1.339915954 | 2.173432863 | 0.703740745 | 0.501515427 | 1.40322851  |
| X26.5_516.022mz_pos | CDP-glycerol                | exact mass match | 48126.17183 | 33699.42999 | 32831.48093 | 1.93E-09    | 4.8E-10     | 0.008119975  | 1.598717843 | 2.230461669 | 0.689325931 | 0.618186364 | 1.115077864 |
| X26.6_502.337mz_pos | Ceanothine D                | exact mass match | 1726535.078 | 1112015.411 | 1058706.589 | 1.76E-09    | 0.00000101  | 0.685783644  | 2.322257474 | 2.227332954 | 0.584123271 | 0.552318673 | 1.057583782 |
| X22.7_535.046mz_pos | Cefamandole nafate          | exact mass match | 156484.9147 | 131621.2615 | 106263.0908 | 0.00000168  | 5.07E-08    | 0.021898016  | 0.656743561 | 1.37589232  | 0.789300255 | 0.591064922 | 1.335386733 |
| X17.8_643.105mz_pos | CEFDITORIN PIVOXIL          | exact mass match | 8930.326842 | 6056.484016 | 3260.266602 | 0.0000123   | 0.000324184 | 0.719638825  | 3.289565606 | 6.559087195 | 0.734545026 | 0.37969691  | 1.934556238 |
| X23.4_492.003mz_pos | Cefixime                    | exact mass match | 41294.71676 | 29553.72593 | 31498.97973 | 5.79E-10    | 4.12E-10    | 0.006354567  | 1.627793369 | 3.001069968 | 0.70803944  | 0.692042441 | 1.023115633 |
| X18.3_534.034mz_pos | Cefmenoxime                 | exact mass match | 44065.00841 | 31715.03726 | 25640.86167 | 8.91E-10    | 4.08E-10    | 0.002965821  | 1.717916357 | 1.927101751 | 0.71403899  | 0.535761401 | 1.332755568 |
| X9.2_567.024mz_pos  | Cefodizime                  | exact mass match | 70506.43578 | 49727.32116 | 46101.27462 | 3.99E-10    | 3.99E-10    | 0.006015513  | 0.510293765 | 1.649963383 | 0.678879285 | 0.57099244  | 1.188946188 |
| X24_543.042mz_pos   | Cefonicid                   | exact mass match | 43330.02556 | 34550.51532 | 36777.93103 | 0.00000695  | 0.00000012  | 0.019789357  | 0.933901155 | 1.964161327 | 0.78614963  | 0.768040388 | 1.023578503 |
| X22_632.106mz_pos   | Cefoperazone sodium         | exact mass match | 52526.47285 | 41643.52563 | 30774.62231 | 0.00000174  | 0.000000236 | 0.055125276  | 1.794995828 | 2.120268188 | 0.772758851 | 0.535378522 | 1.443387845 |
| X27.2_558.062mz_pos | ceforanide                  | exact mass match | 22768.08702 | 16780.66016 | 10542.14099 | 0.00000276  | 4.88E-10    | 0.00151071   | 3.747384909 | 3.297711464 | 0.74129663  | 0.439348783 | 1.68726228  |
| X27.1_494.019mz_pos | Cefotaxime                  | exact mass match | 19129.2944  | 13065.18505 | 8292.912445 | 0.000000306 | 2.27E-09    | 0.005496107  | 5.093535095 | 3.895217283 | 0.694687406 | 0.417569372 | 1.663645499 |
| X10.3_382.03mz_neg  | Ceftizoxime                 | exact mass match | 31356.26489 | 40533.51278 | 5408.727405 | 0.000272808 | 0.00432058  | 2.48E-08     | 7.264876308 | 7.594777911 | 1.337398116 | 0.177452026 | 7.536674261 |
| X18.1_555.053mz_pos | Ceftriaxone                 | exact mass match | 23044.22947 | 15939.14807 | 14064.81121 | 1.97E-08    | 0.000000396 | 0.306436803  | 1.592909195 | 1.626591096 | 0.696681378 | 0.56883254  | 1.224756549 |
| X23.3_485.01mz_pos  | Cefuroxime sodium           | exact mass match | 53009.59518 | 41724.46655 | 34676.34814 | 4.94E-10    | 3.99E-10    | 0.000159992  | 0.691077321 | 1.081772876 | 0.770810489 | 0.593746969 | 1.298213766 |
| X8.3_451.283mz_pos  | Celastrol                   | exact mass match | 23159.02844 | 11775.61542 | 10388.59307 | 3.99E-10    | 3.99E-10    | 0.027435543  | 1.908756066 | 5.495372043 | 0.525308257 | 0.421866219 | 1.245201045 |
| X21.9_483.997mz_pos | Cephapirin sodium           | exact mass match | 16079.27987 | 11558.6179  | 13346.32766 | 0.00000304  | 0.000000151 | 0.033331239  | 1.946335802 | 2.726010807 | 0.733350688 | 0.76966653  | 0.952816134 |
| X21.8_776.572mz_pos | Cerebroside C               | exact mass match | 2488546.779 | 1766236.564 | 1449631.057 | 3.99E-10    | 3.99E-10    | 0.044689393  | 0.352932811 | 1.273817471 | 0.661306589 | 0.525324254 | 1.258854096 |
| X18.6_656.442mz_pos | CerP(d18:1/16:0)            | exact mass match | 9035.643646 | 5938.744627 | 6941.566021 | 0.00000936  | 0.00000133  | 0.075356963  | 8.494263872 | 8.733785003 | 0.714003301 | 0.723203437 | 0.987278634 |
| X14.4_381.284mz_pos | Cetyltrimethylammonium      | exact mass match | 41201.59686 | 30449.31553 | 34413.51445 | 3.99E-10    | 3.99E-10    | 0.013505785  | 1.02784508  | 1.511681208 | 0.752856505 | 0.967543885 |             |
| X37.7_379.179mz_neg | Chaparrin                   | exact mass match | 23556.08696 | 41428.58112 | 45272.3575  | 0.00038049  | 0.00002293  | 0.095979071  | 3.902545771 | 4.501546595 | 1.731186106 | 1.654756187 | 1.046188024 |
| X16.4_360.088mz_neg | Chelirubine                 | exact mass match | 4216.585718 | 8590.239275 | 2585.259    | 0.001028037 | 0.000258196 | 0.214238482  | 8.572447785 | 7.376671331 | 1.918183307 | 0.612704781 | 3.130681148 |
| X19.1_571.714mz_pos | Chenodeoxycholoyl-CoA       | exact mass match | 9103.687473 | 6085.001091 | 6859.390497 | 0.000774521 | 0.0000101   | 0.035034163  | 2.279314427 | 2.990616107 | 0.726453511 | 0.716799427 | 1.013468321 |
| X20.7_460.99mz_pos  | Chloramphenicol succinat    | exact mass match | 22228.80696 | 15887.39965 | 13171.40782 | 1.72E-08    | 4.03E-10    | 0.000247998  | 1.025970002 | 1.509244605 | 0.722632509 | 0.55560241  | 1.300628822 |
| X23_508.685mz_pos   | Chlordecone                 | exact mass match | 80279.67948 | 65696.03724 | 67970.57161 | 0.000000259 | 6.33E-09    | 0.0013015406 | 0.577712996 | 1.244323588 | 0.781463623 | 0.740873802 | 1.454786418 |
| X18.3_510.693mz_pos | Chlordecone alcohol         | exact mass match | 28161.54789 | 21344.12441 | 14077.49467 | 2.41E-09    | 2.1E-09     | 0.046629572  | 2.014994897 | 2.849144668 | 0.753197293 | 0.468237865 | 1.608578353 |
| X13.3_373.273mz_pos | cholocalcic acid / 25,26,   | exact mass match | 7507.522817 | 15997.64981 | 16950.26787 | 0.00000418  | 0.000536347 | 0.901618829  | 2.627241977 | 1.452515948 | 2.024328528 | 1.983838857 | 1.020409758 |
| X7.3_587.376mz_pos  | cholesteryl beta-D-glucos   | exact mass match | 9659.465034 | 3400.712124 | 3145.563133 | 5.07E-08    | 1.04E-08    | 0.036594061  | 1.481350101 | 10.11553173 | 0.430282057 | 0.320968233 | 1.340575211 |
| X17.4_491.011mz_pos | Cl Acid Orange 3            | exact mass match | 42608.69674 | 32226.07504 | 26187.80423 | 6.89E-10    | 5.61E-10    | 0.025574287  | 0.785119059 | 1.100298633 | 0.750501726 | 0.565191844 | 1.327870763 |
| X6_147.045mz_neg    | Cinnamic acid               | exact mass match | 13165.32169 | 7434.146186 | 9601.432202 | 0.00000029  | 0.000218895 | 0.800879279  | 0.737534468 | 1.43812915  | 0.645979544 | 0.663600673 | 0.973446185 |
| X15.5_383.205mz_pos | Cinnacissol C3              | exact mass match | 7915.480307 | 12899.8187  | 12193.95904 | 0.00000162  | 0.001898197 | 0.958378085  | 0.944422912 | 2.288151965 | 1.572317072 | 1.36795313  | 1.149393964 |
| X14_427.232mz_pos   |                             |                  |             |             |             |             |             |              |             |             |             |             |             |

|                     |                             |                      |             |             |             |             |             |             |             |             |              |             |             |
|---------------------|-----------------------------|----------------------|-------------|-------------|-------------|-------------|-------------|-------------|-------------|-------------|--------------|-------------|-------------|
| X10.9_615.244mz_pos | Clomiphene citrate          | exact mass match     | 10472.21252 | 15551.7806  | 14708.13592 | 0.00066049  | 0.000307143 | 0.273732304 | 9.792903929 | 6.446578784 | 1.461539716  | 1.265045783 | 1.15532555  |
| X19.3_538.705mz_pos | CoA(20:0(3Ke))              | exact mass match     | 9418.678733 | 6723.773392 | 4755.15053  | 0.00000268  | 6.31E-10    | 0.00037586  | 1.981850374 | 4.06363546  | 0.763210746  | 0.502203692 | 1.519723488 |
| X27.2_566.727mz_pos | CoA(24:0(3Ke))              | exact mass match     | 14962.09779 | 11206.29042 | 11441.80733 | 0.000178718 | 0.000145511 | 0.294290012 | 6.509054909 | 4.785819863 | 0.761867791  | 0.712314316 | 1.069566866 |
| X28.7_567.74mz_pos  | CoA(24:0(3OH))              | exact mass match     | 66120.52425 | 52431.38168 | 30936.33099 | 9.14E-10    | 3.99E-10    | 0.000289807 | 1.511633552 | 2.528964204 | 0.765774975  | 0.424790665 | 1.8021714   |
| X22.8_715.518mz_pos | COCONUT;(CNP0084305)        | Sirius match         | 181061.7858 | 112394.6573 | 140528.2161 | 4.06E-10    | 3.98E-09    | 0.352796506 | 1.759274969 | 2.70084258  | 0.586149267  | 0.674943597 | 0.868441852 |
| X27.8_355.226mz_pos | COCONUT;(CNP0118734)        | Sirius match         | 59892.13113 | 283317.1587 | 362636.5033 | 3.99E-10    | 6.56E-10    | 0.952924823 | 3.535997821 | 0.82947159  | 4.449510629  | 5.522390251 | 0.805721875 |
| X15.6_265.108mz_neg | COCONUT;(CNP0238385)        | Sirius match         | 25529.35911 | 13917.64524 | 18657.71794 | 0.000000509 | 0.000427651 | 0.988616178 | 0.669352647 | 1.11258567  | 0.589482762  | 0.670147967 | 0.879630755 |
| X15.9_329.233mz_neg | COCONUT;(CNP0275063)        | Sirius match         | 20803.62898 | 3870.435653 | 5424.408682 | 3.99E-10    | 3.99E-10    | 0.859946279 | 0.752873952 | 1.437090409 | 0.256417051  | 0.27445059  | 0.93429222  |
| X18.1_455.317mz_pos | Coenzyme Q4                 | exact mass match     | 23246.52757 | 18674.33602 | 3583.89468  | 0.0000332   | 3.99E-10    | 1.55E-09    | 4.920428726 | 7.68688881  | 0.799135265  | 0.158775787 | 5.03310538  |
| X20.1_613.419mz_pos | Coenzyme Q6                 | exact mass match     | 28573.3779  | 18337.21181 | 15693.59601 | 4.34E-10    | 4.02E-10    | 0.005310773 | 1.763596102 | 2.224728784 | 0.648232363  | 0.514623274 | 1.259625041 |
| X14.5_387.2mz_pos   | Corchoinol C 9- glucoside   | exact mass match     | 5643.380311 | 8357.602105 | 9127.216708 | 0.00026758  | 0.002118389 | 0.722857501 | 2.199450923 | 3.193520677 | 1.429221918  | 1.402070871 | 1.01936496  |
| X15.4_269.174mz_pos | Corey PG-Lactone Diol       | exact mass match     | 6416.635847 | 8573.371738 | 9131.720888 | 0.000746262 | 0.000316767 | 0.266539228 | 1.422733675 | 2.119196566 | 1.315718405  | 1.266342463 | 1.038990986 |
| X12.1_305.195mz_pos | CPX                         | exact mass match     | 662219.0338 | 411672.5756 | 520203.4841 | 0.00000152  | 0.000608609 | 0.980822723 | 0.933243892 | 1.418559901 | 0.572448844  | 0.674879228 | 0.848224128 |
| X28.9_497.291mz_neg | Cucurbitacin S              | exact mass match     | 16570.20033 | 5325.225324 | 4939.764703 | 0.0000015   | 0.002171067 | 0.982263743 | 3.183055061 | 10.24081286 | 0.353241795  | 0.293447576 | 1.203764571 |
| X16.4_360.237mz_pos | Curaclin D                  | exact mass match     | 8816.056607 | 13839.77236 | 15988.31719 | 0.0000718   | 0.001597137 | 0.81676705  | 3.708793133 | 3.388299647 | 1.518651384  | 1.605794066 | 0.945733042 |
| X22.647.117mz_pos   | Cyanidin 3-(2''-glucuronol  | exact mass match     | 19274.67153 | 14258.43581 | 9251.571334 | 0.0000661   | 0.000714568 | 0.677243821 | 4.810317782 | 6.139949832 | 0.462899199  | 0.562869553 | 1.621403191 |
| X20.593.079mz_pos   | Cyanidin 3-(6''-dioxalylglu | exact mass match     | 55333.28941 | 42795.30214 | 36079.54293 | 5.75E-09    | 0.00000056  | 0.462207623 | 0.910412403 | 1.495757394 | 0.753316219  | 0.589551747 | 1.277777944 |
| X12.1_448.104mz_neg | Cyanidin 3-galactoside      | exact mass match     | 14035.60323 | 7741.824582 | 2102.486267 | 0.0000964   | 0.000024    | 0.149510133 | 6.130598915 | 11.51384024 | 0.627574439  | 0.172737523 | 3.6331101   |
| X5.7_462.118mz_pos  | Cyanidin 3-O-(6''-acetyl-   | exact mass match     | 8058.87515  | 12658.58198 | 5472.026961 | 0.001029728 | 0.0000786   | 0.110662434 | 5.138741142 | 7.499122533 | 1.518627027  | 0.649416898 | 2.338447046 |
| X25.8_544.056mz_pos | Cyanidin 3-O-(6''-malony    | exact mass match     | 141879.434  | 118683.0588 | 81169.67849 | 4.61E-09    | 3.99E-10    | 0.0000855   | 0.978667999 | 1.418934081 | 0.789434829  | 0.497085168 | 1.588127911 |
| X3.7_202.053mz_pos  | Cyclamate                   | exact mass match     | 3636.398928 | 12369.01307 | 12358.48037 | 0.000653195 | 0.000656489 | 0.38899022  | 5.499291341 | 6.534835554 | 2.808324391  | 2.558490394 | 1.097648988 |
| X27.5_537.376mz_pos | Cyclotricuspidogenin C      | exact mass match     | 46378.63528 | 34081.91851 | 32533.51774 | 6.24E-10    | 4.05E-10    | 0.003351758 | 1.026672177 | 1.106485898 | 0.726974916  | 1.106485898 | 1.134552902 |
| X21.8_861.48mz_pos  | Cyclotricuspidoside C       | exact mass match     | 16125.56909 | 40756.88352 | 40191.43181 | 0.00277228  | 0.000207222 | 0.125567314 | 3.819659525 | 2.884133124 | 2.334040806  | 2.130226082 | 1.095677509 |
| X13.432.099mz_pos   | Cyhalothrin                 | exact mass match     | 6230.46337  | 7583.640929 | 3499.822158 | 0.000713321 | 0.00000591  | 0.025594974 | 6.235964615 | 5.689876111 | 1.214560582  | 0.564079231 | 2.15317373  |
| X16.5_501.014mz_pos | Cytarabine triphosphate     | exact mass match     | 36191.23811 | 27149.68758 | 22075.34177 | 7.66E-10    | 3.99E-10    | 0.000144843 | 0.780235209 | 1.374113396 | 0.748817952  | 0.560466231 | 1.327676735 |
| X26.4_509.029mz_pos | dATP                        | exact mass match     | 48067.77051 | 37785.44644 | 29631.88473 | 8.07E-10    | 3.99E-10    | 0.0000221   | 0.398929929 | 1.317088465 | 0.773742691  | 0.56782467  | 1.362643668 |
| X12.1_358.107mz_pos | Deacetoxycephalosporin C    | exact mass match     | 27061.04227 | 15805.42905 | 17908.90352 | 0.00000924  | 0.000675052 | 0.870215861 | 4.411640005 | 2.511904565 | 0.591986558  | 0.600511507 | 0.985803853 |
| X28.516.691mz_pos   | Decachlorobiphenyl          | exact mass match     | 16118.68749 | 12102.52163 | 12689.73336 | 2.18E-09    | 3.99E-10    | 0.000000234 | 1.634604748 | 1.823128687 | 0.759421311  | 0.736516598 | 1.031098706 |
| X19.583.345mz_pos   | Deferoxamine                | exact mass match     | 34831.47929 | 44999.23018 | 12988.05083 | 0.003912646 | 0.000545073 | 0.188331802 | 13.144819   | 8.684483621 | 1.247541166  | 0.348209943 | 3.582727007 |
| X13.8_417.164mz_pos | Dehydronimidopine           | exact mass match     | 53202.55345 | 30293.66202 | 44143.13322 | 0.002199255 | 0.00033967  | 0.184141646 | 1.733256532 | 2.999136299 | 0.710750922  | 0.794793041 |             |
| X10.5_752.137mz_pos | Delphinidin 3-(6''-malony   | exact mass match     | 36037.16324 | 25695.19306 | 11373.9621  | 4.01E-10    | 4.04E-10    | 0.025787856 | 9.952239142 | 8.66960851  | 0.714277343  | 0.301684975 | 2.367626506 |
| X21.9_676.133mz_pos | Delphinidin 3-O-(2''-O-g    | exact mass match     | 11289.95133 | 8186.57567  | 5343.730212 | 0.0000452   | 0.000548403 | 0.671232369 | 6.772713949 | 5.874766493 | 0.76142155   | 0.476949854 | 1.596439424 |
| X19.9_637.105mz_pos | Delphinidin 3-O-3'',6''-O-  | exact mass match     | 24242.09686 | 17918.50407 | 13942.88375 | 0.000000364 | 4.32E-08    | 0.048516016 | 1.343618619 | 2.709067097 | 0.7424881708 | 0.539702702 | 1.375723533 |
| X22.661.123mz_pos   | delphinidin-3-O-(6-p-co     | exact mass match     | 21148.07649 | 16116.58033 | 10831.75163 | 0.00000407  | 0.00000247  | 0.143139823 | 3.218281587 | 4.468176527 | 0.766296292  | 0.486394524 | 1.575462415 |
| X21.7_486.014mz_pos | Deoxyuridine triphosphate   | exact mass match     | 31724.65198 | 24074.38672 | 18754.06852 | 5.59E-08    | 1.08E-09    | 0.006320408 | 1.554052916 | 1.570485968 | 0.761709894  | 0.551958154 | 1.380013845 |
| X13.1_472.347mz_pos | DEQUALINIUM                 | exact mass match     | 233003.6307 | 172305.5129 | 161727.178  | 3.99E-10    | 4.03E-10    | 0.137205236 | 0.309284836 | 1.311070526 | 0.68601885   | 0.603740461 | 1.136281058 |
| X37.7_442.09mz_neg  | Desmethylhalofantrine       | exact mass match     | 1470615.332 | 2391225.158 | 3618180.499 | 0.000516919 | 0.000290053 | 0.288985934 | 1.424108606 | 1.190382105 | 1.543510444  | 2.30349838  | 0.670072294 |
| X10.2_530.39mz_pos  | DG(14:0/0:0/14:0) (d5)      | exact mass match     | 8681.450944 | 6240.323043 | 6558.024987 | 0.00000145  | 0.000699563 | 0.984069822 | 1.372516499 | 3.815475775 | 0.772649026  | 0.713705675 | 1.082587757 |
| X17.1_558.421mz_pos | DG(15:0/0:0/15:0) (d5)      | exact mass match     | 2444817.07  | 1763915.581 | 1637255.888 | 3.99E-10    | 4.28E-10    | 0.150464587 | 0.620339095 | 1.065445507 | 0.678522335  | 0.613081295 | 1.106741211 |
| X21.3_586.452mz_pos | DG(16:0/0:0/16:0) (d5)      | exact mass match     | 1344766.867 | 985790.5964 | 887564.5191 | 4E-10       | 4.58E-10    | 0.113352459 | 0.484583768 | 0.919883991 | 0.675956913  | 0.596278434 | 1.133626297 |
| X12.9_706.494mz_pos | DG(20:2(11Z,14Z)/0:0/20:2   | exact mass match     | 632773.882  | 452214.0058 | 395501.6806 | 3.99E-10    | 3.99E-10    | 0.017388325 | 0.281882466 | 0.863019125 | 0.643843683  | 0.533197882 | 1.207513578 |
| X16.9_673.473mz_pos | DG(20:5(5Z,8Z,11Z,14Z,17    | exact mass match     | 385865.1499 | 262020.056  | 313494.9909 | 3.99E-10    | 3.99E-10    | 0.084632743 | 1.10713988  | 1.340049356 | 0.629391298  | 0.692432377 | 0.90895706  |
| X10.3_356.264mz_pos | DHA (d5)                    | exact mass match     | 24844.40923 | 15660.12419 | 14127.83047 | 0.00000115  | 4.46E-08    | 0.02397828  | 0.789698541 | 1.444539636 | 0.63831185   | 0.530197711 | 1.203912874 |
| X16.4_367.048mz_neg | DIACERIN                    | exact mass match     | 72801.26686 | 45903.31776 | 32422.61088 | 0.0000664   | 0.001456486 | 0.808625584 | 2.061138584 | 1.686413869 | 0.663648006  | 0.406608341 | 1.634325895 |
| X16.4_391.989mz_neg | Dialifor                    | exact mass match     | 164158.3531 | 93818.8842  | 65171.90641 | 0.0000309   | 0.000707237 | 0.760746187 | 1.518640678 | 1.080410903 | 0.597788537  | 0.37241672  | 1.605160308 |
| X4.9_505.302mz_pos  | Digitoxigenin monodigitox   | exact mass match     | 37490.63979 | 11380.33625 | 11661.62038 | 7.07E-08    | 0.000257607 | 0.999499533 | 1.551817494 | 2.426708466 | 0.31026318   | 0.28403209  | 1.09235256  |
| X25.3_601.288mz_pos | Dihydro Isorescinnamine     | exact mass match     | 16923.68771 | 27410.82381 | 13918.51146 | 0.0000174   | 0.000144912 | 0.356557178 | 6.227702133 | 3.594152872 | 1.547188411  | 0.748392782 | 2.067522166 |
| X10.515.269mz_pos   | DIHYDROFISSINOLIDE          | exact mass match     | 43446.45487 | 73644.19386 | 295673.93   | 0.000282023 | 0.002170923 | 0.721386646 | 7.499597788 | 7.83460714  | 1.542418429  | 5.606557574 | 0.27510971  |
| X10.2_287.184mz_pos | Dihydrolysergic acid amid   | exact mass match     | 7128.436872 | 9431.902325 | 9818.558038 | 0.000107378 | 0.000853963 | 0.654268249 | 1.238197154 | 2.716316555 | 1.302332716  | 1.234550357 | 1.054904491 |
| X20.1_528.357mz_pos | Dihydroproprymycin          | exact mass match     | 74653.99668 | 58435.72468 | 60147.55709 | 1.66E-09    | 3.99E-10    | 0.00000534  | 1.321222594 | 2.100752456 | 0.753129215  | 0.704678884 | 1.06875519  |
| X16.4_259.19mz_pos  | Diisobutyl adipate          | MS/MS spectrum match | 9673.641073 | 17385.1384  | 22018.27208 | 0.0000543   | 0.000447923 | 0.611662037 | 4.521621163 | 2.827616856 | 1.714274458  | 1.972981163 | 0.868875228 |
| X25.1_634.256mz_pos | Dimoracin                   | exact mass match     | 7370.688133 | 13198.22631 | 3852.143421 | 0.00000184  | 0.002247561 | 0.986471516 | 6.815403066 | 7.543526617 | 1.709299465  | 0.511473813 | 3.341910026 |
| X23.4_479mz_pos     | Dioxation                   | exact mass match     | 25750.74197 | 19116.86371 | 18218.08735 | 0.0000135   | 0.0000412   | 0.358141975 | 1.880674544 | 0.745004837 | 0.654699781  | 1.137933536 |             |
| X9.4_241.108mz_neg  | Diphenylcarbazine           | exact mass match     | 9536.639959 | 5380.908198 | 6740.465201 | 2.18E-08    | 0.00000018  | 0.215693333 | 0.98510778  | 1.897307066 | 0.663629315  | 0.646166306 | 1.027025564 |
| X12.1_350.253mz_pos | Dipipanone                  | exact mass match     | 710797.1638 | 453087.0356 | 622659.7714 | 0.00000126  | 0.000374979 | 0.939996985 | 3.273491482 | 1.882074995 | 0.587836763  | 0.752904943 | 0.780758273 |
| X25.483.672mz_pos   | Diallosyl galactosyl glob   | exact mass match     | 52698.38892 | 46292.88198 | 44292.88198 | 4.27E-10    | 4.01E-10    | 0.004231704 | 0.888217725 | 1.24437679  | 0.752069125  | 0.715188941 | 1.05156705  |
| X16.1_432.259mz_pos | Distigmine                  | exact mass match     | 14658.13    |             |             |             |             |             |             |             |              |             |             |



|                      |                           |                      |             |             |             |             |              |              |             |             |             |             |             |
|----------------------|---------------------------|----------------------|-------------|-------------|-------------|-------------|--------------|--------------|-------------|-------------|-------------|-------------|-------------|
| X28.1_519.042mz_pos  | Dithiazanine iodide       | exact mass match     | 73750.65234 | 55892.08519 | 36385.65594 | 3.99E-10    | 3.99E-10     | 0.0000115    | 1.046012953 | 1.974946861 | 0.729780023 | 0.442353824 | 1.649765378 |
| X17.9_497.368mz_pos  | DL-PPMP                   | exact mass match     | 10041.1745  | 7280.57713  | 8535.196222 | 2.36E-09    | 0.000000103  | 0.321792465  | 1.52308441  | 2.035203065 | 0.765280668 | 0.792476186 | 0.965682883 |
| X14.2_398.311mz_pos  | Docosatraenoyl Ethanol    | exact mass match     | 590700.0086 | 460782.9277 | 437523.6337 | 3.99E-10    | 3.99E-10     | 0.052639509  | 0.398278    | 0.93710133  | 0.710663391 | 0.63567609  | 1.117964641 |
| X19.3_544.715mz_pos  | Docosenoyl-CoA            | exact mass match     | 45303.12543 | 34359.06154 | 23695.965   | 2.41E-08    | 4.57E-10     | 0.001679921  | 1.22229657  | 2.159271012 | 0.749354806 | 0.484088448 | 1.54797085  |
| X26.1_421.226mz_neg  | docusate                  | exact mass match     | 165494.3586 | 334439.8348 | 517680.8609 | 0.000000142 | 0.0003528199 | 0.744176206  | 3.587542998 | 3.045054821 | 2.030638286 | 2.957300911 | 0.686652575 |
| X23.7_479.335mz_pos  | Dolicholide               | exact mass match     | 48887.12414 | 37698.88491 | 40922.61316 | 8.35E-09    | 0.00000581   | 0.786556807  | 1.140732212 | 1.44141527  | 0.755605169 | 0.747009896 | 1.011506237 |
| X5.5_463.291mz_pos   | dolichyl phosphate        | exact mass match     | 45274.02015 | 13788.22321 | 14736.33535 | 0.00000191  | 0.000124721  | 0.748802329  | 1.552005936 | 2.499213316 | 0.312682052 | 0.297224212 | 1.052007338 |
| X19.1_568.056mz_pos  | dTDP-3-amino-2,3,6-trideo | exact mass match     | 14703.67856 | 10252.18141 | 7693.958533 | 0.000000111 | 0.000000005  | 0.067067467  | 2.849476805 | 2.304979871 | 0.715675186 | 0.503875879 | 1.420340239 |
| X17.2_553.037mz_pos  | dTDP-4-oxo-2,3,6-trideo   | exact mass match     | 28346.87718 | 19396.43368 | 22932.61964 | 0.000000686 | 0.0000583    | 0.724897407  | 1.835150052 | 3.600954997 | 0.691756223 | 0.739827025 | 0.935024268 |
| X19.1_583.065mz_pos  | dTDP-4-oxo-5-C-methyl     | exact mass match     | 9044.669028 | 6715.4167   | 4565.071925 | 0.001842564 | 0.000083     | 0.087525108  | 2.789905572 | 3.344572135 | 0.794584038 | 0.500879143 | 1.58637877  |
| X17.2_579.064mz_pos  | dTDP-D-galacturonate      | exact mass match     | 60620.22317 | 46892.50038 | 42276.32155 | 7.65E-10    | 2.77E-09     | 0.101432362  | 0.729490247 | 1.142497932 | 0.748723672 | 0.618550399 | 1.210448936 |
| X23.7_587.072mz_pos  | dTDP-D-glucose            | exact mass match     | 33167.23177 | 24519.94393 | 17502.35907 | 0.0000548   | 0.001541494  | 0.687581013  | 4.669778283 | 4.068186007 | 0.739765799 | 0.494993187 | 1.494496932 |
| X35.8_307.262mz_pos  | Eicosatrienoic acid       | exact mass match     | 6627.464272 | 9681.434063 | 20163.28616 | 0.001834808 | 0.000100947  | 0.089794822  | 4.843425421 | 1.417335389 | 2.534339306 | 0.55925242  |             |
| X14.3_377.206mz_pos  | Enalapril                 | exact mass match     | 6297.459115 | 8931.446362 | 8946.021533 | 0.000268137 | 0.0001542667 | 0.659407526  | 1.498875233 | 2.828278785 | 1.389671328 | 1.260945641 | 1.102086627 |
| X12.7_329.195mz_pos  | endo-1-methyl-N-(9-me     | exact mass match     | 3695.244914 | 6295.020421 | 6354.536844 | 0.00000271  | 0.0003126265 | 0.978164125  | 2.062148697 | 3.019892772 | 1.534585622 | 1.391210747 | 1.103057624 |
| X8.3_622.401mz_pos   | Enniatin B                | exact mass match     | 25818.82936 | 20195.35102 | 19268.22512 | 5.67E-08    | 0.00000106   | 0.342572054  | 0.625883427 | 1.246889666 | 0.779987231 | 1.140553332 |             |
| X22_646.782mz_pos    | Epoxomicin                | exact mass match     | 51915.9717  | 40970.10063 | 31352.27006 | 0.00000253  | 0.00000428   | 0.217773604  | 2.441781163 | 2.621392965 | 0.769885971 | 0.550023557 | 1.399732724 |
| X8.9_405.245mz_pos   | Estradiol-17-phenylprop   | exact mass match     | 8162.816409 | 5882.41904  | 15315.71133 | 0.0000242   | 1.29E-08     | 0.002052336  | 7.491130394 | 13.3332295  | 0.779039756 | 1.622768992 | 0.48006818  |
| X14.7_328.06mz_pos   | Etaconazole               | exact mass match     | 21404.76943 | 14459.24631 | 11847.26726 | 0.000106721 | 0.001468023  | 0.758917757  | 5.336093562 | 3.786893698 | 0.68371651  | 0.510402134 | 1.339564364 |
| X37.7_497.166mz_neg  | Eucaglobulin              | exact mass match     | 10888.18381 | 17143.82131 | 16611.04997 | 0.000253522 | 0.000738842  | 0.522014977  | 1.821324802 | 2.036237059 | 1.571250195 | 1.289777786 | 1.218233258 |
| X28.9_477.129mz_pos  | Eupachlorin acetate       | exact mass match     | 33859.78144 | 198711.5037 | 205306.8761 | 3.99E-10    | 1.84E-08     | 0.999921347  | 5.820751675 | 2.256086151 | 5.568978352 | 5.408303405 | 1.029708937 |
| X27.4_717.441mz_pos  | Evasterioside E           | exact mass match     | 4261.227837 | 7236.863583 | 8188.319582 | 0.004625893 | 0.003812908  | 0.468034621  | 1.993315523 | 6.726016346 | 1.570749648 | 1.568106897 | 1.001685313 |
| X30.2_357.289mz_pos  | Evocarpine                | exact mass match     | 8748.829345 | 14660.65375 | 20997.44899 | 0.004434213 | 0.00000286   | 0.004828851  | 4.014037027 | 6.739973521 | 1.627753964 | 2.058850139 | 0.790613136 |
| X13_329.233mz_neg    | FA 18:1+3O                | MS/MS spectrum match | 81953.07437 | 139126.4007 | 257642.4639 | 0.00000971  | 0.0000697    | 0.472965188  | 2.17843853  | 1.818537746 | 1.75297647  | 0.87708637  | 0.609288789 |
| X16.4_223.134mz_pos  | FA13:3+1O                 | MS/MS spectrum match | 36502.19486 | 222701.9558 | 242938.4952 | 0.0000457   | 0.001167377  | 0.4680385619 | 0.432870583 | 0.812357024 | 0.622763651 | 2.627030544 | 0.985337904 |
| X6.1_326.217mz_pos   | Farnesylcysteine          | exact mass match     | 15502.28202 | 11596.98057 | 10617.67501 | 0.000000636 | 0.00000701   | 0.387433713  | 1.144713425 | 1.982966931 | 0.761710901 | 0.637915773 | 1.19406187  |
| X37.7_708.427mz_pos  | Fasciculin acid C         | exact mass match     | 110749.299  | 237909.0035 | 257213.3603 | 0.000162107 | 0.000197657  | 0.347185483  | 3.73710247  | 4.288370611 | 2.07756987  | 0.514720503 | 1.014725537 |
| X25_495.023mz_pos    | Fd& red no. 1--prohibite  | exact mass match     | 109547.8092 | 85586.26791 | 65142.24929 | 4.21E-10    | 3.99E-10     | 0.000181817  | 0.841852139 | 0.909605778 | 0.74540631  | 0.204783607 | 1.434070449 |
| X10.3_788.823mz_pos  | Fistularin 1              | exact mass match     | 54029.23911 | 35714.06865 | 14772.72003 | 4.21E-10    | 4.59E-09     | 0.290826546  | 12.61241599 | 8.023282523 | 0.652270454 | 0.26073833  | 2.501628565 |
| X16.3_348.077mz_pos  | Flumipropyn               | exact mass match     | 23359.04544 | 18152.27672 | 10574.27004 | 0.001179434 | 0.000101175  | 0.129828248  | 4.375294372 | 3.450118459 | 0.779027691 | 0.42810887  | 1.819695282 |
| X37.7_424.124mz_neg  | Fluotrimazole             | exact mass match     | 19329.19291 | 35921.53202 | 38272.42027 | 0.000235569 | 0.0000582    | 0.170637662  | 2.608139653 | 3.180426418 | 1.850887045 | 1.690736363 | 1.094722445 |
| X22.6_966.692mz_pos  | FMC-5(d18:1/20:0)         | exact mass match     | 133396.3406 | 65257.64609 | 55886.97328 | 3.99E-10    | 3.99E-10     | 0.038907781  | 0.819381244 | 2.582757693 | 0.466614184 | 0.361742882 | 1.28990564  |
| X26.7_994.724mz_pos  | FMC-5(d18:1/22:0)         | exact mass match     | 34484.51987 | 20610.30781 | 12033.83563 | 3.99E-10    | 3.99E-10     | 1.32E-08     | 1.725347863 | 2.804486637 | 0.603862783 | 0.330483238 | 1.827211531 |
| X22.4_1010.718mz_pos | FMC-6(d18:1/22:0(2-OH))   | exact mass match     | 314587.0889 | 208862.051  | 166323.03   | 3.99E-10    | 3.99E-10     | 0.009686308  | 0.411751929 | 1.491260597 | 0.616447023 | 0.460333108 | 1.339132492 |
| X26.3_1038.75mz_pos  | FMC-6(d18:1/24:0(2-OH))   | exact mass match     | 65682.69031 | 39441.65821 | 24262.3873  | 3.99E-10    | 3.99E-10     | 0.0000128    | 1.849623073 | 4.133564875 | 0.588392962 | 0.338415395 | 1.738669991 |
| X5.1_301.177mz_neg   | Formestane                | exact mass match     | 7758.131783 | 11622.87162 | 12794.36572 | 0.000118272 | 0.000305994  | 0.451580719  | 5.399510279 | 5.467228242 | 1.49541355  | 1.364447373 | 1.095984777 |
| X28.7_659.436mz_pos  | Fucoxanthin               | exact mass match     | 9543.289563 | 16280.20566 | 16689.40925 | 0.000015    | 0.000437603  | 0.752648127  | 2.441878591 | 3.082997362 | 1.646082239 | 1.551709396 | 1.060818633 |
| X37.7_690.366mz_neg  | Fumonisin C2              | exact mass match     | 52268.77618 | 105078.9278 | 130431.2501 | 0.000085    | 0.0000401    | 0.203071979  | 2.488063787 | 3.243785736 | 2.005377331 | 2.182562108 | 0.918817991 |
| X22.7_534.377mz_pos  | Fusidic acid              | exact mass match     | 296481.844  | 245396.7476 | 167236.8822 | 0.00000041  | 4.56E-10     | 0.000338024  | 0.79426108  | 1.55422079  | 0.769200733 | 0.496562767 | 1.58505036  |
| X18.1_549.043mz_pos  | gadopentetic acid         | exact mass match     | 24033.45626 | 19051.34747 | 13496.28444 | 0.00000336  | 0.00000555   | 0.224603973  | 1.917402915 | 2.447844724 | 0.79464588  | 0.525226723 | 1.512957824 |
| X21.4_598.085mz_pos  | Gadoteridol               | exact mass match     | 40032.94554 | 29668.32397 | 20647.13709 | 2.84E-08    | 0.00000038   | 0.273962527  | 3.300564705 | 3.232986668 | 0.741428061 | 0.483173948 | 1.534495111 |
| X37.7_944.677mz_neg  | Galabiosylceramide (d18:1 | exact mass match     | 16529.3983  | 43025.16452 | 62638.61563 | 0.000567068 | 0.002495308  | 0.662735569  | 8.242902299 | 6.665083442 | 2.513783942 | 3.217424639 | 0.78130313  |
| X20.7_996.703mz_pos  | Galabiosylceramide (d18:1 | exact mass match     | 329846.7047 | 217840.3983 | 179489.2875 | 3.99E-10    | 3.99E-10     | 0.01469791   | 0.400550054 | 1.547155939 | 0.617051229 | 0.475281421 | 1.298286027 |
| X18.9_1026.713mz_pos | Galabiosylceramide (d18:1 | exact mass match     | 33012.70427 | 19705.39867 | 14889.95237 | 3.99E-10    | 3.99E-10     | 0.000186722  | 2.180647751 | 2.932614694 | 0.605805402 | 0.422995739 | 1.432178498 |
| X20.3_1040.729mz_pos | Galabiosylceramide (d18:1 | exact mass match     | 96309.80479 | 61902.76648 | 46167.92643 | 3.99E-10    | 3.99E-10     | 0.0000132    | 0.868215391 | 2.027872533 | 0.615031723 | 0.416948182 | 1.47507952  |
| X11.5_560.4mz_pos    | gamma-Chaconine           | exact mass match     | 810602.8658 | 602037.5345 | 557634.8173 | 3.99E-10    | 3.99E-10     | 0.04738518   | 0.596879137 | 1.000468233 | 0.665270989 | 0.588164948 | 1.131095947 |
| X19.3_477.004mz_pos  | GAMGLEOIDIN ACETATE       | exact mass match     | 19191.31666 | 14100.3127  | 8179.42015  | 4.15E-08    | 7.22E-10     | 0.004364755  | 1.901035967 | 4.242610431 | 0.743727074 | 0.411375604 | 1.808012109 |
| X26.8_572.402mz_pos  | Ganoderic acid Me         | exact mass match     | 28902.65106 | 21457.36839 | 15011.72123 | 1.16E-09    | 3.99E-10     | 0.000101797  | 0.884613356 | 2.795882177 | 0.74452681  | 0.486784397 | 1.529479611 |
| X32.1_603.394mz_pos  | Ganoderic acid Mg         | exact mass match     | 83211.45831 | 174363.6335 | 223720.0719 | 0.0000785   | 0.0000616    | 0.256241747  | 2.017050905 | 3.798243375 | 1.968831725 | 2.28470938  | 0.861742742 |
| X23.3_527.338mz_neg  | Ganoderic acid V          | exact mass match     | 33135.34541 | 16420.59656 | 23443.87681 | 0.000000122 | 0.002037857  | 0.83262302   | 0.907912181 | 0.91463988  | 0.533292666 | 0.649511048 | 0.821067891 |
| X12.7_430.295mz_pos  | GANT 61                   | exact mass match     | 11089.37725 | 26874.08289 | 22158.73929 | 0.003027858 | 0.004965002  | 0.583027443  | 8.215852896 | 0.715400853 | 2.276774709 | 1.745545251 | 1.304334395 |
| X27.1_552.051mz_pos  | GDP-4-Dehydro-6-deoxy     | exact mass match     | 32661.25558 | 25098.54769 | 24052.99698 | 0.00000953  | 0.00000269   | 0.110444539  | 1.021572728 | 1.497879559 | 0.764328606 | 0.675982687 | 1.130692576 |
| X20.7_454.98mz_pos   | Geodin hydrate; 3,5-Dichl | exact mass match     | 9118.508077 | 6798.131437 | 7320.317743 | 9.73E-08    | 7.23E-10     | 0.00283408   | 1.117788191 | 3.321427359 | 0.794037531 | 0.75769614  | 1.047999704 |
| X33.6_377.164mz_neg  | Gibberellin A17           | exact mass match     | 26399.01677 | 39689.85225 | 38411.38707 | 0.003633801 | 0.000259072  | 0.126584614  | 2.815199246 | 3.565577439 | 1.500553742 | 1.264030102 | 1.187118677 |
| X37.7_380.208mz_pos  | Gibberellin A36           | exact mass match     | 692638.6943 | 1001072.405 | 1756536.091 | 0.00187689  | 0.000459151  | 0.230447945  | 1.791187946 | 1.706337012 | 1.295675122 | 2.24932168  | 0.576029268 |
| X39.2_365.198mz_pos  | Gibberellin A44 diacid    | exact mass match     | 20169.3699  | 33844.64452 | 59803.71007 | 0.003371977 | 0.00062119   | 0.120201124  | 3.877550248 | 3.708096494 | 1.602304089 | 2.550684464 | 0.628185929 |
| X13.5_409.149mz_pos  | Ginkgolide A              | exact mass match     | 74743.34619 | 52765.30883 | 51492.17481 | 0           |              |              |             |             |             |             |             |

|                     |                                                              |                  |             |             |             |             |             |             |             |             |             |             |             |
|---------------------|--------------------------------------------------------------|------------------|-------------|-------------|-------------|-------------|-------------|-------------|-------------|-------------|-------------|-------------|-------------|
| X22.4_543.376mz_pos | Ginsenoyno A linoleate                                       | exact mass match | 145190.9338 | 117915.8133 | 100396.9482 | 4.66E-08    | 1.01E-09    | 0.006370227 | 0.42995583  | 1.237421118 | 0.764567672 | 0.601681787 | 1.270717658 |
| X16.7_692.505mz_pos | GlcCer(d14:1/18:1)                                           | exact mass match | 14289.00821 | 7332.592178 | 5796.820189 | 3.99E-10    | 5.9E-10     | 0.937441163 | 1.94608456  | 5.884402533 | 0.550766784 | 0.397083667 | 1.387029559 |
| X12.9_664.474mz_pos | GlcCer(d14:2(4E,6E)/16:0)                                    | exact mass match | 6766.066546 | 3373.792523 | 2203.047931 | 0.000000981 | 0.00000856  | 0.376371991 | 3.526171985 | 4.874427204 | 0.614770562 | 0.346383536 | 1.774826161 |
| X21.3_632.484mz_pos | GlcCer(d14:2(4E,6E)/18:1(9Z))                                | exact mass match | 9163.576604 | 3872.425457 | 2985.858237 | 4E-10       | 5.16E-10    | 0.158967233 | 1.011222892 | 12.70556499 | 0.514220461 | 0.341328225 | 1.506527806 |
| X33.8_490.179mz_neg | Glipizide                                                    | exact mass match | 16214.45154 | 27654.03761 | 25507.69542 | 0.000440937 | 0.001719814 | 0.628091014 | 3.064439525 | 3.156407552 | 1.719500945 | 1.331381926 | 1.291515914 |
| X24.9_490.016mz_pos | Glucosylsyringic acid                                        | exact mass match | 36608.5667  | 25822.16179 | 18602.64057 | 6.65E-10    | 3.99E-10    | 0.000397109 | 0.907978355 | 1.84081776  | 0.710583311 | 0.476027049 | 1.492737257 |
| X16.3_406.083mz_pos | Glucocleomin                                                 | exact mass match | 21987.59739 | 32725.79809 | 17090.47894 | 0.000274305 | 0.004145994 | 0.846466316 | 3.764456377 | 3.399846966 | 1.421167779 | 0.710360829 | 2.00062802  |
| X37.7_448.08mz_neg  | Glucosylquercetin                                            | exact mass match | 32809.69945 | 58665.1787  | 87766.53876 | 0.000135417 | 0.000519736 | 0.531324406 | 2.024095888 | 1.485307329 | 1.785921976 | 2.344320723 | 0.761807869 |
| X23.7_476.01mz_pos  | Glucoraphanin                                                | exact mass match | 28616.78598 | 20611.66971 | 11646.29959 | 5.14E-10    | 3.99E-10    | 0.00016281  | 2.501776375 | 3.806953155 | 0.724499118 | 0.386029768 | 1.876795984 |
| X16.4_408.052mz_neg | Glucotropaeolin                                              | exact mass match | 20394.82945 | 11983.98515 | 4735.919822 | 0.0000301   | 0.001454475 | 0.882846233 | 5.142316973 | 7.021202291 | 0.65534029  | 0.238608438 | 2.747321239 |
| X11_259.119mz_neg   | Glycerol tripropanoate                                       | exact mass match | 13463.24989 | 23500.52423 | 27609.02673 | 0.0000142   | 0.000661859 | 0.828308745 | 0.537781147 | 0.908687543 | 1.756425183 | 1.759027394 | 0.998520654 |
| X33.1_339.289mz_pos | Glycidyl oleate                                              | exact mass match | 64364.26688 | 104850.9985 | 216998.3225 | 0.003671682 | 0.000414882 | 0.165878688 | 3.237444352 | 2.662771437 | 1.545305213 | 2.897150844 | 0.533387903 |
| X26.2_581.329mz_pos | Goshonolide F6                                               | exact mass match | 20555.04309 | 40419.92637 | 33341.92442 | 0.0000735   | 0.003894855 | 0.945875851 | 8.499412027 | 6.156794118 | 1.850508837 | 1.427039362 | 1.296697572 |
| X17.3_524.02mz_pos  | Gossypetin 7,8-dimethyl ether                                | exact mass match | 24358.28332 | 18830.23143 | 20984.05249 | 5.14E-08    | 0.000000193 | 0.172697299 | 1.114418514 | 1.973151198 | 0.769374164 | 0.710696131 | 1.010782459 |
| X6_649.428mz_pos    | Goyaglycoside A                                              | exact mass match | 14364.54952 | 4394.862891 | 3965.969532 | 0.00000423  | 0.00000774  | 0.580789949 | 1.615166401 | 8.235704407 | 0.324099287 | 0.256963974 | 1.248265365 |
| X25.5_702.536mz_pos | GPNEtn(16:0/18:1(9Z))                                        | exact mass match | 154742.9578 | 113050.4254 | 83076.10491 | 4.1E-10     | 3.05E-08    | 0.609041406 | 1.194068176 | 2.058816478 | 0.692951597 | 0.464271888 | 1.492555582 |
| X10.3_715.115mz_pos | Guanosine diphosphate adenylylated                           | exact mass match | 33510.99118 | 23029.56907 | 19764.79537 | 3.99E-10    | 4.01E-10    | 0.082352947 | 4.740496342 | 3.802815968 | 0.690393391 | 0.55107848  | 1.252804122 |
| X18.7_612.082mz_pos | Guanosine diphosphofuranosylated                             | exact mass match | 5935.781356 | 4210.5675   | 2739.037581 | 0.00257807  | 0.000372186 | 0.181387897 | 4.356630471 | 12.12554134 | 0.798049811 | 0.469869101 | 1.698451357 |
| X24.2_541.035mz_pos | Guanosine triphosphate (GTP)                                 | exact mass match | 82797.62592 | 66599.37058 | 72131.05981 | 0.00000234  | 6.42E-08    | 0.021891157 | 2.836718972 | 3.99076929  | 0.763966087 | 0.757673277 | 1.00830544  |
| X37.7_440.095mz_neg | GW 848687X                                                   | exact mass match | 73770.30794 | 124216.6025 | 185527.7855 | 0.00012543  | 0.000444677 | 0.511515845 | 1.688745307 | 1.26332152  | 1.672039261 | 2.232587327 | 0.748924461 |
| X5.8_508.349mz_pos  | Gymnodimine                                                  | exact mass match | 14905.04418 | 4465.673907 | 4467.433339 | 1.59E-08    | 0.000521089 | 0.880341006 | 1.575800839 | 6.224215479 | 0.308140993 | 0.279658502 | 1.101847398 |
| X11.4_382.024mz_neg | H 151/73                                                     | exact mass match | 6125.856701 | 8619.79686  | 5280.200559 | 0.004639974 | 0.00000377  | 3.532789119 | 3.223736037 | 1.400999209 | 0.766294695 | 1.828277318 | 0.7337318   |
| X25_484.006mz_pos   | H-89                                                         | exact mass match | 50693.62058 | 38232.80758 | 38864.29308 | 5.03E-10    | 4E-10       | 0.011331222 | 0.586834824 | 1.26151782  | 0.74030229  | 0.691223845 | 1.071002246 |
| X34.6_531.178mz_neg | Haplodimerine                                                | exact mass match | 370430.6479 | 1628913.24  | 1889527.769 | 3.99E-10    | 8.13E-10    | 0.971593655 | 0.838406267 | 0.884072411 | 4.122907748 | 4.525458506 | 0.911047449 |
| X23.3_490.351mz_pos | HECODOGEMIN ACETATE                                          | exact mass match | 154378.9613 | 116350.2221 | 72734.75659 | 4.06E-10    | 3.99E-10    | 0.00000564  | 0.150202823 | 1.746178139 | 0.710100987 | 0.409291839 | 1.734950272 |
| X18.7_647.108mz_pos | Hectochlorin                                                 | exact mass match | 19157.58294 | 15138.16572 | 9477.579191 | 0.000023    | 0.00000269  | 0.078353037 | 1.981368936 | 2.37698918  | 0.794215053 | 0.471871152 | 1.683118473 |
| X20_605.403mz_pos   | Hederagenin 3-O-arabinoside                                  | exact mass match | 26600.52912 | 18446.0329  | 18614.07701 | 6.01E-08    | 9.18E-09    | 0.031626793 | 0.971979435 | 1.485942196 | 0.698311256 | 0.647306893 | 1.078794716 |
| X53.4_627.458mz_pos | Heptanoyl thio-PC                                            | exact mass match | 7787.95767  | 18861.1187  | 23930.19127 | 0.002334882 | 0.001369888 | 0.365884016 | 13.02529402 | 5.966919171 | 2.183992901 | 2.520201906 | 0.866594417 |
| X15.7_588.431mz_pos | Hericenone C                                                 | exact mass match | 1119190.78  | 812458.6742 | 767044.741  | 3.99E-10    | 3.99E-10    | 0.190926049 | 0.353211487 | 0.865215502 | 0.668356001 | 0.615035273 | 1.086695397 |
| X18.7_616.462mz_pos | Hericenone D                                                 | exact mass match | 3878637.814 | 2777465.823 | 2599722.966 | 3.99E-10    | 4.14E-10    | 0.095942182 | 0.612689993 | 0.896653241 | 0.686756357 | 0.616241368 | 1.114427548 |
| X21.3_612.425mz_pos | Hericenone E                                                 | exact mass match | 15594.00562 | 11612.82835 | 6675.950886 | 0.0000037   | 0.000442552 | 0.88551165  | 5.635978094 | 6.252749221 | 0.761771153 | 0.419341126 | 1.816590615 |
| X15.1_331.213mz_neg | Hexadecanedioic acid                                         | exact mass match | 34800.0408  | 15739.4038  | 25681.51568 | 0.000000901 | 0.000283333 | 0.930523412 | 1.246385334 | 1.336437711 | 0.486773425 | 0.660116486 | 0.737405345 |
| X20.7_460.656mz_pos | Hexaflumuron                                                 | exact mass match | 21056.55521 | 16597.41338 | 13966.00695 | 2.96E-08    | 4.02E-10    | 0.000140138 | 0.79185828  | 2.083705543 | 0.788295311 | 0.615863428 | 1.279893961 |
| X7.9_295.211mz_pos  | HMDB:(4669);SuperNatural                                     | Sirius match     | 77859.4292  | 53337.6941  | 44642.35416 | 3.99E-10    | 3.99E-10    | 0.00000192  | 1.430252329 | 0.49908278  | 0.658358326 | 0.500876007 | 1.314413781 |
| X18.9_562.379mz_pos | Hovenidulcigenin A                                           | exact mass match | 11991.95041 | 7876.927768 | 9001.233245 | 3.07E-08    | 4.07E-10    | 0.000328481 | 2.867490493 | 2.60799815  | 0.690480273 | 0.702937047 | 0.982278961 |
| X15.7_476.284mz_pos | Hydrocortamate                                               | exact mass match | 9665.33242  | 13255.2073  | 14417.05727 | 0.003261803 | 0.0000249   | 0.029281277 | 4.191738635 | 1.840285477 | 1.344100856 | 1.334551362 | 1.007155584 |
| X6.3_574.36mz_pos   | Hydroxydestruxin B                                           | exact mass match | 41720.02512 | 12846.66407 | 13362.84635 | 0.000000762 | 0.00000788  | 0.387666967 | 1.026856232 | 1.776940941 | 0.326596573 | 0.293932979 | 1.111125993 |
| X32.1_440.151mz_neg | Hydroxydomperidone(M2)                                       | exact mass match | 13675.55424 | 22813.88202 | 26357.45433 | 0.000123325 | 0.003589828 | 0.89730755  | 2.967457942 | 2.479680645 | 1.673726039 | 1.632912811 | 1.024994125 |
| X21.7_480.343mz_pos | Hydroxysintaxanthin 5,6-epoxide                              | exact mass match | 32800.9658  | 180186.6954 | 193925.6481 | 0.000310443 | 0.00453981  | 0.849748816 | 1.012267499 | 0.9822246   | 0.499774    | 0.510522385 | 0.978946301 |
| X27.4_543.052mz_pos | Hypericin                                                    | exact mass match | 36614.06081 | 29183.96999 | 23912.56184 | 1.38E-09    | 3.99E-10    | 0.0000284   | 0.627919024 | 1.446616552 | 0.792860004 | 0.604783502 | 1.310981536 |
| X16.5_530.7mz_pos   | Icosenoyl-CoA                                                | exact mass match | 49611.85041 | 39060.777   | 33106.52922 | 1.44E-08    | 8.08E-10    | 0.008583931 | 0.83389839  | 1.182773073 | 0.769155381 | 0.601169584 | 1.279431631 |
| X14.7_341.232mz_pos | Idebenone Metabolite (1,4-dihydroxy-2,3,5-trimethoxybenzene) | exact mass match | 4574.02852  | 18641.98539 | 16262.69537 | 0.00000723  | 0.001436629 | 0.972719927 | 5.495641087 | 2.052773544 | 3.421809642 | 2.838178016 | 1.205636018 |
| X15.1_355.209mz_pos | Idebenone Metabolite (Benzoic acid derivative)               | exact mass match | 17275.07728 | 10071.92013 | 11198.22227 | 0.0000206   | 0.003277172 | 0.989079781 | 5.24117424  | 6.695842097 | 0.606814949 | 0.596410543 | 1.017445041 |
| X13.5_604.426mz_pos | Ilexonide A                                                  | exact mass match | 52002.82252 | 37566.25225 | 36731.81734 | 3.99E-10    | 4E-10       | 0.03974063  | 0.617171016 | 1.419309997 | 0.704249286 | 0.631126933 | 1.115859978 |
| X6.8_281.195mz_pos  | Imipramine                                                   | exact mass match | 224052.6172 | 163241.1145 | 152517.4466 | 3.99E-10    | 3.99E-10    | 0.002532567 | 1.073583546 | 0.542458191 | 0.679005985 | 0.591607068 | 1.14773136  |
| X21.4_566.049mz_pos | Indoxacarb                                                   | exact mass match | 10882.12716 | 7480.196853 | 8832.024393 | 0.0000301   | 0.0000192   | 0.201115623 | 1.815918037 | 1.573631847 | 0.724934971 | 0.760903066 | 0.952729727 |
| X16.4_366.084mz_pos | Inosine 5'-monophosphate                                     | exact mass match | 12194.70398 | 8002.496249 | 5135.989263 | 0.000649645 | 0.0000356   | 0.085053421 | 2.398736929 | 2.880546997 | 0.698446915 | 0.411517588 | 1.692746813 |
| X15.8_509.001mz_pos | Inosine triphosphate                                         | exact mass match | 13182.69098 | 9394.9611   | 10337.00279 | 0.000000175 | 0.00000604  | 0.488796702 | 1.336555278 | 1.646414647 | 0.734524017 | 0.731239419 | 1.004491823 |
| X8.7_312.192mz_pos  | Isoleucyl-Tyrosine                                           | exact mass match | 13793.36926 | 9272.640781 | 10876.326   | 0.000717797 | 0.003880918 | 0.723826261 | 5.20763084  | 8.245098336 | 0.712254529 | 0.725412902 | 0.981808051 |
| X27.8_534.052mz_pos | Isopentenyladenosine-5'-phosphate                            | exact mass match | 115954.7355 | 91165.29385 | 56218.02903 | 4.17E-10    | 3.99E-10    | 0.0000223   | 1.187351906 | 1.996378076 | 0.750377617 | 0.423388766 | 1.772313481 |
| X9.9_598.043mz_pos  | Isopentenyladenosine-5'-triphosphate                         | exact mass match | 7856.209974 | 3906.972153 | 2713.910171 | 3.99E-10    | 3.99E-10    | 0.0000446   | 2.13304043  | 10.97679445 | 0.602562763 | 0.363837212 | 1.656132863 |
| X15.8_555.045mz_pos | Isorhamnetin 3-glucuronide                                   | exact mass match | 33754.67132 | 26004.66361 | 19672.17156 | 0.00000152  | 0.000000613 | 0.098582935 | 1.536027623 | 1.137809453 | 0.767730936 | 0.538434182 | 1.425858464 |
| X17.2_565.057mz_pos | Isoctellarein 4'-methyl ether                                | exact mass match | 25533.10457 | 19470.31253 | 13303.7518  | 4.75E-08    | 9.09E-08    | 0.123557876 | 1.922247738 | 2.502980962 | 0.764896025 | 0.490877353 | 1.558222274 |
| X7.8_386.274mz_pos  | Istamycin C                                                  | exact mass match | 642653.5882 | 519304.8567 | 491477.1435 | 3.99E-10    | 4.2E-10     | 0.09522969  | 0.845910891 | 0.786664458 | 0.730078237 | 0.652377812 | 1.119103415 |
| X6.8_432.28mz_pos   | Istamycin C1                                                 | exact mass match | 8461.928545 | 5293.385042 | 3715.592555 | 0.00000447  | 2.57E-08    | 0.008656098 | 1.805438355 | 5.902290724 | 0.698393216 | 0.4452977   | 1.568373731 |
| X37.7_400.148mz_neg | JWH 369                                                      | exact mass match | 1102277.192 | 1824398.222 | 2307529.938 | 0.000335681 | 0.00000299  | 0.02415493  | 2.827366119 | 2.506794523 | 1.578507471 | 1.932343115 | 0.816887777 |
| X17.3_521.031mz_pos | Kaempferol 3-sulfate-7-oxide                                 | exact mass match | 22632.95221 | 16223.89367 |             |             |             |             |             |             |             |             |             |



|                     |                                 |                      |             |             |             |             |             |             |             |             |             |             |             |
|---------------------|---------------------------------|----------------------|-------------|-------------|-------------|-------------|-------------|-------------|-------------|-------------|-------------|-------------|-------------|
| X16.4_507.278mz_neg | Kazinol E                       | exact mass match     | 70967.09851 | 34967.94968 | 58339.26873 | 1.29E-08    | 0.002880855 | 0.544541825 | 2.50997612  | 2.185605312 | 0.504476536 | 0.745672877 | 0.675638669 |
| X8.1_502.979mz_pos  | KB2115                          | exact mass match     | 7389.873531 | 3717.2915   | 3095.096728 | 6.79E-10    | 0.000000015 | 0.24670384  | 2.612021155 | 10.51030953 | 0.611342514 | 0.429736332 | 1.422599087 |
| X23.7_611.914mz_pos | KDNaIpha2-3Galbeta1-4G          | exact mass match     | 39297.39974 | 26410.4724  | 30346.93503 | 3.99E-10    | 3.99E-10    | 0.010997243 | 8.299227905 | 10.22604311 | 0.66799161  | 0.701496542 | 0.952237923 |
| X20.7_671.796mz_pos | Kelevan                         | exact mass match     | 10264.38752 | 7189.984673 | 2645.983822 | 0.0000759   | 3.67E-09    | 0.00034461  | 7.248556097 | 8.868155016 | 0.744240856 | 0.273899305 | 0.712720682 |
| X28.8_562.065mz_pos | KRP_203-phosphate               | exact mass match     | 37067.52271 | 27406.09416 | 18161.52824 | 2.49E-08    | 3.99E-10    | 0.000000672 | 0.897620428 | 2.057146281 | 0.740931003 | 0.459603979 | 1.612107458 |
| X25.8_629.395mz_neg | Kurilensoside F                 | exact mass match     | 1965.939867 | 7095.915903 | 11349.97551 | 0.00000157  | 0.001058757 | 0.998216059 | 2.08759117  | 5.127804341 | 2.734760572 | 3.633409887 | 0.752670537 |
| X21.7_500.689mz_pos | Lacto-N-difucopentaose          | exact mass match     | 115667.8241 | 93242.57992 | 78601.75827 | 2.48E-09    | 4.02E-10    | 0.000580572 | 0.708500766 | 0.789902443 | 0.764503041 | 0.591820313 | 1.29178236  |
| X11.1_336.237mz_pos | L-Citronellol glucoside         | exact mass match     | 8255.671859 | 4676.478172 | 6738.337204 | 0.0000668   | 0.000861518 | 0.711628083 | 4.062672864 | 8.006984794 | 0.654518527 | 0.745623498 | 0.877813707 |
| X16.8_464.834mz_pos | Leptophos                       | exact mass match     | 46363.18622 | 33242.21678 | 26089.84733 | 3.99E-10    | 3.99E-10    | 0.006042514 | 0.757830554 | 1.853058587 | 0.711883248 | 0.5187988   | 1.372175973 |
| X14.3_280.263mz_pos | Linoleamide                     | exact mass match     | 19791.902   | 6443.667643 | 4286.158577 | 0.002205765 | 0.002533146 | 0.486454931 | 1.774804615 | 9.56348862  | 0.352608594 | 0.220500392 | 1.599129107 |
| X33.6_279.233mz_neg | Linoleic acid                   | exact mass match     | 87634.02438 | 123303.2813 | 224898.3076 | 0.004658983 | 0.00082873  | 0.220715361 | 2.099623731 | 2.10159988  | 1.391129893 | 2.250852264 | 0.618045847 |
| X19.1_574.066mz_pos | Lipoyl-AMP                      | exact mass match     | 48308.4849  | 35761.56497 | 28792.19961 | 7.51E-10    | 4.21E-10    | 0.006726778 | 0.717429373 | 2.108192174 | 0.728787189 | 0.547417568 | 1.3313186   |
| X28.4_577.074mz_pos | Lithospermic acid               | exact mass match     | 25152.50953 | 18862.507   | 11097.65817 | 0.00000655  | 4.46E-10    | 0.000217077 | 1.497652737 | 2.699602196 | 0.754231926 | 0.420315162 | 1.794443775 |
| X20.9_515.286mz_neg | L-Olivosyl-oleandolide          | exact mass match     | 1928.412741 | 5219.156217 | 6481.779133 | 0.004843737 | 0.002001514 | 0.342995449 | 5.514982328 | 3.422340184 | 2.07179856  | 2.026005678 | 1.022602544 |
| X24.5_519.033mz_pos | Lorazepam glucuronide           | exact mass match     | 164615.7179 | 136891.8115 | 111809.2847 | 1.93E-09    | 4.06E-10    | 0.001394577 | 0.452120953 | 1.078929687 | 0.776733616 | 0.58991914  | 1.316678107 |
| X19.5_536.299mz_neg | LPC 16:2                        | MS/MS spectrum match | 67855.68239 | 42083.93371 | 53014.53472 | 0.0000526   | 0.003150175 | 0.942908695 | 1.182024908 | 1.181751324 | 0.636908614 | 0.706937929 | 0.901652442 |
| X21.4_512.336mz_neg | LPC O-15:0                      | MS/MS spectrum match | 126018.7642 | 81489.15177 | 97841.78973 | 0.000703949 | 0.000968223 | 0.44826505  | 1.798624605 | 1.471844081 | 0.665211627 | 0.693490314 | 0.959222664 |
| X32.1_444.145mz_neg | Lucinamide                      | exact mass match     | 18180.03792 | 33519.02655 | 33972.70951 | 0.0000518   | 0.000532151 | 0.649785499 | 2.857614529 | 2.75480607  | 1.84228698  | 1.607563459 | 1.146011978 |
| X10.8_612.373mz_pos | L-Urobilin                      | exact mass match     | 6526.427872 | 12771.38917 | 14965.43509 | 0.000592899 | 0.002890248 | 0.687303914 | 9.630848904 | 6.511973511 | 1.82946983  | 1.945902873 | 0.940165028 |
| X25.2_463.99mz_pos  | Luteolin 7,3'-disulfate         | exact mass match     | 5962.150971 | 3136.643118 | 3589.343138 | 0.0000117   | 0.0000104   | 0.204058447 | 2.649907635 | 1.10128512  | 0.649333458 | 0.583077348 | 1.113631769 |
| X16.1_460.289mz_pos | Lyngbyatoxin                    | exact mass match     | 36104.67266 | 48920.10987 | 65326.73102 | 0.000693406 | 0.000000928 | 0.006947016 | 10.53120774 | 6.653191151 | 1.299605981 | 1.593254942 | 0.815692421 |
| X16.2_269.128mz_pos | Lysergic acid                   | exact mass match     | 7257.410197 | 9882.900619 | 10584.79666 | 0.000476762 | 0.001312817 | 0.554795189 | 4.131556619 | 4.044623631 | 1.350348055 | 1.286246034 | 1.049836516 |
| X5.6_616.37mz_pos   | LysoPC(22:1(13Z))               | exact mass match     | 36978.06596 | 11110.21181 | 10797.23318 | 0.000000303 | 0.0000118   | 0.540812363 | 1.179626885 | 2.484368751 | 0.321615977 | 0.269352659 | 1.194033048 |
| X16.9_637.157mz_neg | Malvidin 3-(6''-p-coumar        | exact mass match     | 17768.4909  | 8955.899702 | 7216.065606 | 4.58E-10    | 4E-10       | 0.002325777 | 1.072790457 | 2.643059142 | 0.573135346 | 0.389892433 | 1.46998325  |
| X8.7_613.378mz_pos  | Mancinellin                     | exact mass match     | 15718.12067 | 9695.834379 | 7572.472895 | 4.34E-10    | 3.99E-10    | 0.003093531 | 1.631544602 | 4.82658982  | 0.639027418 | 0.464829504 | 1.374756577 |
| X28.1_597.091mz_pos | Mangiferin 6'-gallate           | exact mass match     | 135410.266  | 114573.1111 | 82360.72377 | 0.00000196  | 0.000000001 | 0.000871309 | 0.693503856 | 1.41528344  | 0.797148691 | 0.530746023 | 1.501940019 |
| X18.8_731.514mz_pos | Mannosyl-1beta-phospho          | exact mass match     | 22300.09288 | 15739.55978 | 17608.33915 | 3.99E-10    | 4.13E-10    | 0.125267486 | 1.438178809 | 1.690481911 | 0.710690128 | 0.723378882 | 0.982459049 |
| X5.9_312.238mz_pos  | Margaric acid(d3)               | exact mass match     | 34464.39588 | 27651.86716 | 26569.38769 | 0.00000604  | 0.000118993 | 0.849356567 | 2.162602843 | 3.059561393 | 0.792623794 | 0.766118653 | 1.122507939 |
| X19.1_520.361mz_pos | Medicaginic acid                | exact mass match     | 92286.5421  | 74264.91462 | 50553.86509 | 0.00000172  | 2.12E-09    | 0.002081334 | 0.88829774  | 1.232659744 | 0.773507599 | 0.485009926 | 1.594828388 |
| X16.4_325.082mz_neg | Methyl nigakinone               | exact mass match     | 43987.34926 | 27497.59434 | 13103.97724 | 0.00000778  | 0.0000351   | 0.096191325 | 2.798898713 | 3.629594413 | 0.666816527 | 0.283153129 | 2.65486789  |
| X17_448.315mz_pos   | METHYLBENZETHONIUM              | exact mass match     | 63820.6562  | 49963.7685  | 48804.65738 | 0.00000054  | 0.001182763 | 0.986354106 | 0.774798872 | 1.430865395 | 0.750179845 | 0.63220769  | 1.131116336 |
| X24.2_539.384mz_pos | Methylcarbonyl PAF C-16         | exact mass match     | 306375.5459 | 263864.8979 | 188707.0573 | 1.02E-08    | 4.11E-10    | 0.000807596 | 0.819912364 | 1.48030187  | 0.794663295 | 0.534753114 | 1.486037714 |
| X11.9_357.111mz_pos | Met-Val-OH                      | exact mass match     | 10433.96473 | 13565.00912 | 8560.68912  | 0.00000347  | 0.000285165 | 0.826195784 | 3.575979915 | 3.114997173 | 1.288648599 | 0.76198341  | 1.691176712 |
| X7.4_556.122mz_neg  | Mezlocillin penicilloate        | exact mass match     | 15802.65468 | 20717.98158 | 3535.550171 | 0.000960255 | 0.00000138  | 0.00764872  | 10.65427841 | 11.05468794 | 1.352806877 | 0.245247766 | 5.516082371 |
| X27.8_329.268mz_pos | MG(0:0/16:1(9Z)/0:0)            | exact mass match     | 9164.009285 | 13455.19357 | 19241.25848 | 0.002144853 | 0.000835443 | 0.297358999 | 1.022863707 | 2.64270019  | 1.448534993 | 1.825996227 | 0.793284768 |
| X28.5_329.268mz_pos | MG(16:1(9Z)/0:0/0:0)            | exact mass match     | 16547.0588  | 29034.38272 | 47802.34886 | 0.00066351  | 0.001412321 | 0.527225616 | 2.131206597 | 2.179699529 | 1.710488162 | 2.468385519 | 0.692958271 |
| X15.8_747.509mz_pos | MGDG(18:3(9Z,12Z,15Z)/1         | exact mass match     | 6048.334599 | 3162.415282 | 4013.343053 | 2.35E-08    | 0.000000083 | 0.148553941 | 2.038956051 | 5.667693407 | 0.651988196 | 0.641180442 | 1.016856026 |
| X18.1_775.54mz_pos  | MGDG(18:3(9Z,12Z,15Z)/1         | exact mass match     | 304662.8481 | 210562.0224 | 239597.4304 | 3.99E-10    | 3.99E-10    | 0.010725478 | 1.134872505 | 1.189847168 | 0.637408447 | 0.672645377 | 0.947614403 |
| X16.4_405.111mz_pos | Mollicellin D                   | exact mass match     | 7425.631806 | 4027.164318 | 2931.560776 | 0.00014884  | 0.000173277 | 0.33616848  | 10.96874795 | 4.641623532 | 0.634399493 | 0.38770365  | 1.636172225 |
| X30.4_564.922mz_pos | Molybdoenzyme molybde           | exact mass match     | 56037.0182  | 34573.07184 | 16893.34819 | 4.05E-10    | 3.99E-10    | 0.000571176 | 2.105886583 | 3.923179213 | 0.61032816  | 0.278785841 | 2.189236573 |
| X9.7_714.443mz_pos  | Momordicoside E                 | exact mass match     | 47968.51918 | 33754.05815 | 10375.52892 | 3.99E-10    | 3.99E-10    | 0.00000784  | 13.55095271 | 12.42252515 | 0.69581497  | 0.209649406 | 3.318945577 |
| X6.4_649.428mz_pos  | Momordicoside K                 | exact mass match     | 8096.870595 | 2483.648789 | 2268.209784 | 4.07E-08    | 0.002122388 | 0.723372595 | 1.799240169 | 13.15684164 | 0.330737698 | 0.280057917 | 1.180961787 |
| X14.9_315.216mz_pos | Mono-N-desisopropylidist        | exact mass match     | 9388.584667 | 21695.84279 | 18716.92647 | 2.22E-08    | 0.00000378  | 0.621871349 | 3.343729471 | 3.36865347  | 2.18680053  | 1.761704634 | 1.241298052 |
| X6.8_699.443mz_pos  | Mycinamicin III                 | exact mass match     | 12055.78148 | 3919.801063 | 4382.592352 | 5.64E-09    | 0.0000112   | 0.905986046 | 1.945625229 | 8.516387055 | 0.390671582 | 0.33230531  | 1.105996078 |
| X6.7_685.428mz_pos  | Mycinamicin VI                  | exact mass match     | 19459.77549 | 6560.757763 | 6424.002082 | 1.05E-08    | 0.000000928 | 0.476990002 | 1.49662479  | 2.945116807 | 0.378020157 | 0.309179553 | 1.222655748 |
| X15.8_570.054mz_pos | Myricatin                       | exact mass match     | 16579.91201 | 11693.14192 | 9406.220401 | 5.22E-08    | 1.34E-09    | 0.00158636  | 1.207877523 | 1.986789973 | 0.72113292  | 0.53763882  | 1.341296226 |
| X20.7_671.127mz_pos | Myricetin 3,7-diglucuronic      | exact mass match     | 15627.17639 | 12120.11689 | 7379.6883   | 0.00000554  | 0.00000743  | 0.20436842  | 3.952732041 | 6.013308186 | 0.790218214 | 0.457630223 | 1.726761421 |
| X32.1_354.173mz_pos | N-(9-FLUORENYLMETHC             | exact mass match     | 29735.52561 | 50635.0602  | 64885.4405  | 0.0000431   | 0.00037129  | 0.603440596 | 1.854324977 | 2.498054138 | 1.640577995 | 1.87818684  | 0.873490305 |
| X16.5_515.69mz_pos  | N-(1-Deoxy-1-fructosyl)h        | exact mass match     | 68771.32415 | 51810.4458  | 42223.55696 | 4.1E-10     | 3.99E-10    | 0.002189006 | 0.683424904 | 1.169465579 | 0.725219326 | 0.544746259 | 1.331297488 |
| X12.6_298.201mz_pos | N-(3-oxododecanoyl) hor         | exact mass match     | 51917.15091 | 79365.65783 | 76129.28321 | 0.00000109  | 0.001069198 | 0.999957483 | 7.360306662 | 2.374177827 | 1.459207445 | 1.29004906  | 1.13112557  |
| X6.9_488.135mz_neg  | N-(4-acetamidophenyl)-li        | exact mass match     | 5764.030791 | 11286.28747 | 2246.954956 | 0.001017157 | 0.00000113  | 0.00633193  | 13.0944772  | 12.21790532 | 1.86283923  | 0.419890403 | 4.436489184 |
| X16.4_211.122mz_pos | N,N-Dimethyltryptamine          | exact mass match     | 5778.072276 | 3704.805983 | 3715.963484 | 0.002483574 | 0.0000204   | 0.02983481  | 1.708650656 | 4.449221922 | 0.745565624 | 0.594945942 | 1.253165324 |
| X8.4_492.307mz_pos  | N2'-Acetylgentamicin C1a        | exact mass match     | 14144.3342  | 8507.439236 | 6080.877863 | 3.99E-10    | 4E-10       | 0.04182978  | 6.845872751 | 0.632780425 | 0.421267459 | 1.502087122 |             |
| X28.5_382.18mz_pos  | N-Acetylmuramoyl-Ala            | exact mass match     | 10411.5224  | 19997.33515 | 23894.8848  | 0.0001666   | 0.002963857 | 0.838574479 | 4.290895078 | 2.616512192 | 1.861385859 | 1.948075208 | 0.95499999  |
| X7.8_295.211mz_pos  | N-Acetylprocainamide            | exact mass match     | 20349.03249 | 14082.32612 | 12697.49383 | 3.61E-09    | 6.87E-09    | 0.00861103  | 1.385018875 | 0.806277192 | 0.698933292 | 0.577792094 | 1.209662263 |
| X23.1_666.13mz_pos  | NADH                            | exact mass match     | 32216.56247 | 25166.79115 | 12908.46715 | 0.0000133   | 1.56E-08    | 0.00365627  | 2.750814818 | 3.815383593 | 0.779790097 | 0.383240954 | 2.034725382 |
| X19.1_548.039mz_pos | Naphthal AS-BI $\alpha$ -D-gluc | exact mass match     | 10632.36731 | 7975.043331 | 7937.9505   |             |             |             |             |             |             |             |             |

|                     |                                |                  |             |             |             |             |             |             |             |             |             |             |             |
|---------------------|--------------------------------|------------------|-------------|-------------|-------------|-------------|-------------|-------------|-------------|-------------|-------------|-------------|-------------|
| X8.5_474.327mz_pos  | Narbomycin                     | exact mass match | 599796.8834 | 497247.885  | 490989.4807 | 4.02E-10    | 2.02E-09    | 0.337295918 | 0.484756201 | 0.837858777 | 0.749745729 | 0.694870938 | 1.078971199 |
| X17.3_416.173mz_pos | N-Desmethylnepomam glu         | exact mass match | 8698.650913 | 11107.9777  | 6258.693609 | 0.001595637 | 0.0000017   | 0.006457694 | 7.758913285 | 5.726343856 | 1.267086112 | 0.683806848 | 1.852988334 |
| X15.1_378.284mz_pos | N-docosahexaenoyl GABA         | exact mass match | 54971.88232 | 26608.87925 | 39355.99644 | 0.00000097  | 0.000362895 | 0.951349313 | 2.468212039 | 1.836257402 | 0.478196466 | 0.627874003 | 0.761612144 |
| X16.7_483.333mz_pos | N-docosahexaenoyl histid       | exact mass match | 4909.08754  | 2695.043818 | 3971.581884 | 0.0000689   | 0.0000331   | 0.198643102 | 2.084506026 | 9.221037876 | 0.681239088 | 0.738782729 | 0.922110197 |
| X30.3_587.087mz_pos | Neobetanin                     | exact mass match | 9008.468096 | 6080.723419 | 2239.722215 | 0.001433445 | 0.001706916 | 0.465686759 | 4.953273749 | 7.520110147 | 0.735015975 | 0.266942389 | 2.975462938 |
| X8.5_529.329mz_pos  | Neolinderachalcone             | exact mass match | 16235.6096  | 9375.565311 | 6313.716035 | 3.99E-10    | 3.99E-10    | 0.00074692  | 4.030522118 | 4.497011299 | 0.603436151 | 0.381004952 | 1.583801333 |
| X30.4_535.324mz_pos | neriifolin                     | exact mass match | 59718.46891 | 39629.164   | 20490.77902 | 0.00000149  | 0.0000237   | 0.490931209 | 10.03605074 | 6.84193954  | 0.643014807 | 0.318457867 | 2.0191519   |
| X16.3_317.195mz_pos | Neryl glucoside                | exact mass match | 1245849.894 | 2110150.618 | 1996653.1   | 0.000253887 | 0.001131604 | 0.604490476 | 1.137823996 | 1.440575562 | 1.519300873 | 1.450314497 | 1.047566494 |
| X28.9_475.116mz_neg | N-Ethylmaleimide-S-gluta       | exact mass match | 9795.832766 | 58651.99116 | 66745.35987 | 3.99E-10    | 5.19E-09    | 0.999822743 | 0.492458513 | 0.870386715 | 5.594084892 | 5.681107286 | 0.984682142 |
| X26.4_497.678mz_pos | Neu5Aca2-8Neu5Aca2-3           | exact mass match | 11776.54291 | 9006.85189  | 9345.308624 | 0.0000007   | 3.99E-10    | 1.26E-08    | 2.104580203 | 2.588813289 | 0.790075238 | 0.745868159 | 1.059269293 |
| X19.6_646.104mz_pos | Nicotinamide adenine din       | exact mass match | 11709.95106 | 8604.856793 | 5968.21687  | 0.000112213 | 0.001805599 | 0.79167574  | 4.080019507 | 4.539512799 | 0.766881024 | 0.497550821 | 1.541311946 |
| X11.8_242.175mz_pos | N-nonanoyl-L-Homoserin         | exact mass match | 3734.946843 | 10688.09582 | 10390.58776 | 0.0000316   | 0.001052743 | 0.827760243 | 3.400976963 | 2.633702256 | 2.425153475 | 2.178847256 | 1.11304428  |
| X10.5_414.305mz_pos | N-oleoyl methionine            | exact mass match | 10180.74044 | 7553.778182 | 7491.733262 | 2.29E-09    | 5.36E-10    | 0.010420913 | 1.005989024 | 2.202274041 | 0.781319804 | 0.695816265 | 1.122882351 |
| X17.1_623.089mz_pos | NORSTICTIC ACID PENTA          | exact mass match | 20856.56963 | 16054.46595 | 11138.57194 | 3.25E-08    | 1.63E-08    | 0.056855005 | 1.691331267 | 2.754101169 | 0.504321877 | 1.534933397 |             |
| X20.7_572.379mz_pos | Notoginsenoside R10            | exact mass match | 11238.34515 | 6461.242161 | 8242.384438 | 3.99E-10    | 4.08E-10    | 0.280430661 | 1.944647991 | 6.6486534   | 0.623460661 | 0.68848045  | 0.905560442 |
| X25.4_475.006mz_pos | Novaluron                      | exact mass match | 43774.18469 | 31610.24434 | 26018.09775 | 4E-10       | 3.99E-10    | 0.00180818  | 0.658951044 | 1.750590505 | 0.718234004 | 0.549482693 | 1.30710942  |
| X16.4_590.18mz_pos  | Novclobiocin 104               | exact mass match | 148512.9404 | 80325.16556 | 63488.61705 | 0.0000195   | 0.000512385 | 0.752454114 | 2.97854872  | 1.912169773 | 0.511358585 | 0.381606677 | 1.340014776 |
| X11.4_370.279mz_pos | N-palmitoyl methionine         | exact mass match | 64455.15048 | 48789.43663 | 42384.95359 | 4.02E-10    | 3.99E-10    | 0.002724838 | 0.747722205 | 1.051104972 | 0.730010544 | 0.57984197  | 1.258981898 |
| X6.3_328.233mz_pos  | N-palmitoyl taurine            | exact mass match | 345921.9902 | 294178.8277 | 290553.0843 | 4.63E-09    | 8.45E-09    | 0.082329936 | 1.198237437 | 0.769540125 | 0.785166268 | 0.719009903 | 1.092010367 |
| X15.9_368.3mz_pos   | N-propyl arachidonoyl an       | exact mass match | 115008.7783 | 93747.13916 | 77619.0725  | 0.0000179   | 1.85E-08    | 0.003234975 | 1.292199924 | 0.326028433 | 0.773834826 | 0.584964978 | 1.322873769 |
| X15.7_439.326mz_pos | NSC 23766                      | exact mass match | 358462.1138 | 265260.4262 | 300321.9968 | 3.99E-10    | 4E-10       | 0.021702974 | 1.112202285 | 1.169175576 | 0.689239131 | 0.719983285 | 0.957298795 |
| X16.4_322.094mz_pos | NSC 663284                     | exact mass match | 5586.108114 | 3445.915051 | 2370.407265 | 0.002566982 | 0.0000201   | 0.02901078  | 2.380224433 | 5.779489067 | 0.728202913 | 0.414718543 | 1.755896681 |
| X8.4_356.264mz_pos  | N-stearoyl taurine             | exact mass match | 45879.9181  | 336217.6577 | 317125.0781 | 3.99E-10    | 3.99E-10    | 0.030278249 | 1.01843436  | 0.661124418 | 0.673837003 | 0.592295013 | 1.137671242 |
| X17.9_317.231mz_pos | NYLIDROL                       | exact mass match | 4246.893534 | 6039.422325 | 6893.107281 | 0.0000054   | 0.000327653 | 0.806522438 | 1.222882584 | 3.287104842 | 1.347739009 | 1.346033044 | 1.001267402 |
| X37.7_472.176mz_neg | OA-6129 B1                     | exact mass match | 176039.3362 | 270169.3232 | 371743.2932 | 0.0000789   | 0.000200363 | 0.424549934 | 2.078135907 | 1.999939047 | 1.539725961 | 1.922334374 | 0.800966773 |
| X26.7_499.695mz_pos | O-b-D-glucopyranosyl-(D        | exact mass match | 24164.90001 | 16766.95477 | 14573.49739 | 4.99E-10    | 5.02E-10    | 0.030052711 | 2.1620473   | 2.48548516  | 0.700062749 | 0.55994846  | 1.250227117 |
| X7_398.751mz_pos    | Octachlorostyrene              | exact mass match | 37127.12594 | 12428.20102 | 12373.18573 | 4.01E-10    | 8.37E-09    | 0.566985527 | 1.141031858 | 2.165654369 | 0.360141847 | 0.316001428 | 1.13752439  |
| X17.7_583.405mz_pos | OH-Diaponeurosporene g         | exact mass match | 7725.258215 | 4754.888437 | 3736.07168  | 1.55E-09    | 6.18E-10    | 0.017417834 | 2.559885073 | 5.855601903 | 0.700994459 | 0.491001064 | 1.427684196 |
| X21.7_542.426mz_pos | OLEANANOIC ACID ACET           | exact mass match | 56109.62338 | 39521.52176 | 25798.33767 | 5.62E-10    | 3.99E-10    | 0.000136251 | 0.675365751 | 2.131563269 | 0.694957834 | 0.424970896 | 1.635306889 |
| X37.7_281.248mz_neg | Oleic Acid                     | exact mass match | 60664.91368 | 104051.1427 | 220940.5338 | 0.000152491 | 0.0000524   | 0.189407652 | 3.81848135  | 2.932861274 | 1.670063593 | 3.169321358 | 0.275646233 |
| X13.1_794.546mz_pos | Oligomycin D                   | exact mass match | 496826.2722 | 360797.3562 | 323929.7924 | 3.99E-10    | 3.99E-10    | 0.114282776 | 0.349509113 | 1.022191639 | 0.658898321 | 0.59162712  | 1.178365989 |
| X18.6_659.954mz_pos | Omphalotin A                   | exact mass match | 37781.80119 | 25161.3868  | 19456.7179  | 4.02E-10    | 4.02E-10    | 0.013777916 | 2.663630503 | 2.214457657 | 0.664731048 | 0.480079526 | 1.384626947 |
| X26.1_529.046mz_pos | Orange B                       | exact mass match | 209219.6728 | 169025.3132 | 130146.7609 | 1.37E-09    | 4.01E-10    | 0.000775004 | 0.525327281 | 1.244794208 | 0.754290546 | 0.544580115 | 1.385086464 |
| X28.6_551.048mz_pos | Orientin 7-O-sulfate           | exact mass match | 31287.43691 | 21646.79243 | 22662.09782 | 0.000000099 | 3.65E-09    | 0.013679625 | 2.579998313 | 2.043939106 | 0.689393565 | 0.665397892 | 1.03606214  |
| X18.1_554.385mz_pos | PA(12:0/12:0)[U]               | exact mass match | 69012.87734 | 56078.696   | 47194.93552 | 2.21E-08    | 9.47E-10    | 0.008050201 | 0.737800517 | 1.438310046 | 0.783390784 | 0.60310888  | 1.298920992 |
| X28.8_568.409mz_pos | PA(12:0/13:0)                  | exact mass match | 19477.54074 | 13705.84137 | 3760.86061  | 0.0000156   | 4.55E-10    | 0.0000321   | 3.653001666 | 9.570777319 | 0.71606822  | 0.203478992 | 3.519126052 |
| X37.7_618.429mz_pos | PA(12:0/15:1(9Z))              | exact mass match | 723782.8503 | 1074289.558 | 1882746.576 | 0.004964269 | 0.001150491 | 0.25659335  | 3.383379459 | 2.74596899  | 1.319811481 | 2.343526887 | 0.563173176 |
| X19.1_587.403mz_pos | PA(12:0/17:1(9Z))              | exact mass match | 19920.45017 | 13644.15962 | 12212.023   | 3.99E-10    | 3.99E-10    | 0.0000196   | 0.613542368 | 1.7348411   | 0.691486252 | 0.569700977 | 1.213770521 |
| X19.6_603.396mz_pos | PA(12:0/17:2(9Z,12Z))          | exact mass match | 12294.09725 | 6969.655044 | 8327.708562 | 3.99E-10    | 4.26E-10    | 0.123687579 | 1.696343697 | 3.110147133 | 0.608938182 | 0.637593189 | 0.955057539 |
| X18.3_617.413mz_pos | PA(12:0/18:2(9Z,12Z))          | exact mass match | 13284.81748 | 8839.839827 | 8176.290067 | 3.99E-10    | 3.99E-10    | 0.000456543 | 1.189251941 | 2.462126326 | 0.691194611 | 0.585610685 | 1.180297132 |
| X15.6_659.457mz_pos | PA(13:0/20:2(11Z,14Z))         | exact mass match | 45981.33237 | 32666.14957 | 35083.69127 | 3.99E-10    | 3.99E-10    | 0.004420634 | 1.144720387 | 0.543882002 | 0.700579576 | 0.689970085 | 1.01537674  |
| X17.8_657.447mz_pos | PA(13:0/20:3(8Z,11Z,14Z))      | exact mass match | 15652.53375 | 11245.80142 | 6390.197434 | 0.000000248 | 0.00000719  | 0.481505908 | 2.88464446  | 6.284303862 | 0.736073917 | 0.401235275 | 1.834519451 |
| X5.6_679.439mz_pos  | PA(13:0/22:6(4Z,7Z,10Z,13Z))   | exact mass match | 35807.72186 | 10775.13726 | 8879.535739 | 0.00000559  | 0.0000632   | 0.515589069 | 1.668564496 | 3.652045365 | 0.316705916 | 0.230343355 | 1.374929681 |
| X28.5_582.416mz_pos | PA(14:0/12:0)                  | exact mass match | 68060.34864 | 54395.45179 | 38399.62879 | 6.29E-09    | 1.05E-09    | 0.005800485 | 0.996992536 | 1.9224387   | 0.770920037 | 0.504768252 | 1.527275208 |
| X25.5_685.509mz_pos | PA(16:0e/18:0)                 | exact mass match | 131715.0377 | 93369.5763  | 102607.1521 | 4E-10       | 3.99E-10    | 0.005718917 | 1.150997041 | 1.231738498 | 0.66807447  | 0.671799109 | 0.994455724 |
| X13.8_749.509mz_pos | PA(18:0/22:6(4Z,7Z,10Z,13Z))   | exact mass match | 35951.49471 | 27325.47776 | 21565.01657 | 0.003485393 | 0.001038166 | 0.278347592 | 1.293083604 | 3.046231396 | 0.75314036  | 0.548399788 | 1.373341815 |
| X27.5_715.428mz_neg | PA(18:3(6Z,9Z,12Z)/20:5(5Z))   | exact mass match | 25858.09167 | 42707.67447 | 56861.52988 | 0.000574285 | 0.003893963 | 0.752036432 | 0.847050846 | 1.364329675 | 1.678068873 | 1.900880055 | 0.882785249 |
| X19.7_791.562mz_pos | PA(21:0/22:6(4Z,7Z,10Z,13Z))   | exact mass match | 19801.59604 | 11642.65866 | 13446.36263 | 3.99E-10    | 3.99E-10    | 0.051970796 | 1.621032248 | 1.921819624 | 0.603846243 | 0.626755846 | 0.963447325 |
| X13_601.415mz_pos   | PA(O-16:0/12:0)                | exact mass match | 23421.41004 | 14577.89579 | 18743.07218 | 3.99E-10    | 4.12E-10    | 0.116618102 | 1.570508976 | 2.359717641 | 0.631908542 | 0.7358986   | 0.856896962 |
| X14.8_615.431mz_pos | PA(O-16:0/13:0)                | exact mass match | 8946.749417 | 4612.949126 | 6628.702684 | 0.000000815 | 0.000159372 | 0.865928114 | 3.219744827 | 4.692424891 | 0.598166629 | 0.69583418  | 0.859639618 |
| X20.4_659.483mz_pos | PA(O-16:0/O-16:0)[U]           | exact mass match | 21383.38437 | 12679.71089 | 14044.66941 | 4E-10       | 4.3E-10     | 0.077901268 | 2.109554449 | 1.915361262 | 0.607369198 | 0.604484016 | 1.004772965 |
| X22.9_671.493mz_pos | PA(O-18:0/15:0)                | exact mass match | 372763.3511 | 278161.9363 | 288158.3225 | 4.01E-10    | 4.54E-10    | 0.08232873  | 1.291044708 | 1.756868273 | 0.687736684 | 0.655943259 | 1.048469779 |
| X21.4_705.485mz_pos | PA(P-11:0/22:6(4Z,7Z,10Z,13Z)) | exact mass match | 14868.03375 | 11457.86342 | 5089.694717 | 0.00027864  | 0.00000234  | 0.022553301 | 4.633408925 | 8.734348831 | 0.789701057 | 0.343726156 | 2.29747153  |
| X8.7_566.352mz_pos  | PAF C-16-d4                    | exact mass match | 13134.1388  | 8679.274604 | 5252.275739 | 4.77E-08    | 0.000000289 | 0.211631658 | 4.309505173 | 13.0491054  | 0.691086735 | 0.401216167 | 1.722479781 |
| X6.7_298.222mz_pos  | Palmitic acid(d3)              | exact mass match | 8932.171544 | 6105.979959 | 5123.316281 | 0.000194346 | 0.0000172   | 0.093881568 | 4.068641547 | 4.820362221 | 0.740043986 | 0.563562882 | 1.313152461 |
| X16.2_503.679mz_pos | Palmitoyl CoA                  | exact mass match | 60750.70388 | 50349.49207 | 51274.12789 | 0.00000192  | 9.04E-08    | 0.029717452 | 0.636894233 | 1.086980505 | 0.799218268 | 0.74952048  |             |

|                     |                                 |                  |             |             |             |             |             |             |             |             |             |              |             |
|---------------------|---------------------------------|------------------|-------------|-------------|-------------|-------------|-------------|-------------|-------------|-------------|-------------|--------------|-------------|
| X19.7_605.403mz_pos | Papyriferic acid                | exact mass match | 12244.4117  | 8627.743861 | 9969.774985 | 0.000283365 | 0.0000184   | 0.083209501 | 1.881170455 | 2.518189886 | 0.731620018 | 0.757841792  | 0.96539941  |
| X8.9_492.979mz_pos  | Patuletin 3,3'-di-O-sulfate     | exact mass match | 5121.028158 | 3388.446211 | 3446.392177 | 0.000012    | 0.000000012 | 0.002921032 | 1.106984692 | 7.95557718  | 0.78803534  | 0.651105881  | 1.210302905 |
| X9.3_666.428mz_pos  | PAz-PC                          | exact mass match | 5980.601082 | 3901.425777 | 2325.664016 | 0.000228583 | 0.00000615  | 0.046893024 | 4.82127767  | 7.973809184 | 0.75888487  | 0.398467899  | 1.904506917 |
| X21.4_566.384mz_pos | PC(10:0/10:0)                   | exact mass match | 13874.88213 | 9715.645538 | 10701.5324  | 0.00000297  | 0.00000146  | 0.122041023 | 2.623969178 | 2.583472126 | 0.720652974 | 0.716511658  | 1.00577983  |
| X23.5_572.403mz_pos | PC(10:0/13:0)[U]                | exact mass match | 14562.41545 | 8087.234017 | 6085.306162 | 9.38E-09    | 4.34E-10    | 0.001912595 | 3.637199627 | 6.163942377 | 0.582993951 | 0.410640513  | 1.419718546 |
| X18.1_607.41mz_pos  | PC(11:1(10E)/11:1(10E))[U]      | exact mass match | 6652.611621 | 4019.872114 | 3198.27529  | 0.0000302   | 0.000202628 | 0.533264398 | 4.110976594 | 7.652385456 | 0.707148846 | 0.486514109  | 1.45350121  |
| X18.3_704.515mz_pos | PC(12:0/18:1(9Z))               | exact mass match | 3603955.745 | 2540327.715 | 2348198.3   | 3.99E-10    | 3.99E-10    | 0.077716305 | 0.560598557 | 0.973159129 | 0.66545263  | 0.596809228  | 1.115017327 |
| X19.6_724.488mz_pos | PC(14:1(9Z)/18:4(6Z,9Z,12Z))    | exact mass match | 14651.0498  | 8685.451824 | 10180.17301 | 3.09E-08    | 2.3E-09     | 0.016409983 | 1.941161363 | 3.100156668 | 0.616932908 | 0.652036874  | 0.946162606 |
| X20.4_464.315mz_pos | PC(15:0/0:0)                    | exact mass match | 7320.36562  | 5218.739034 | 5991.909218 | 0.000765144 | 0.000000051 | 0.004158197 | 3.006593774 | 4.157354865 | 0.7897994   | 0.774763873  | 1.019406592 |
| X14.2_513.363mz_pos | PC(16:0/0:0)[U] / PC(16:0/0:0)  | exact mass match | 13046.07965 | 9121.096362 | 10974.57697 | 0.000000902 | 0.000000051 | 0.107077143 | 1.979451952 | 2.539937833 | 0.720956906 | 0.774421917  | 0.930961392 |
| X24_555.376mz_pos   | PC(16:0/2:0)                    | exact mass match | 92665.81625 | 74949.21594 | 81830.39837 | 0.00000216  | 0.000000864 | 0.104155177 | 3.277919791 | 3.144652157 | 0.766760781 | 0.768625239  | 0.997574294 |
| X21.8_822.604mz_pos | PC(16:0/23:5(8E,11E,14E,17E))   | exact mass match | 42465.66732 | 24809.90206 | 20602.1868  | 3.99E-10    | 3.99E-10    | 0.069577578 | 1.636242364 | 2.890642945 | 0.590864925 | 0.450304901  | 1.312144114 |
| X16.8_690.499mz_pos | PC(18:0/11:1(10E))              | exact mass match | 1480932.675 | 1049584.641 | 907788.757  | 3.99E-10    | 3.99E-10    | 0.047656468 | 0.355037976 | 0.871826298 | 0.656911205 | 0.560790658  | 1.171025963 |
| X21.4_592.41mz_pos  | PC(18:1(9Z)/4:0)                | exact mass match | 20334.49717 | 14296.00335 | 16085.75474 | 0.000000113 | 0.000000699 | 0.555791328 | 2.828394799 | 3.140850605 | 0.711390645 | 0.724647218  | 0.98170617  |
| X21.4_847.598mz_pos | PC(18:2(9Z,12Z)/22:6(4Z,7Z))    | exact mass match | 403316.3445 | 260927.3668 | 296682.0294 | 3.99E-10    | 3.99E-10    | 0.02634781  | 1.151216376 | 1.372847883 | 0.601384291 | 0.630143501  | 0.954360856 |
| X11.5_766.515mz_pos | PC(18:3(6Z,9Z,12Z)/20:5(5Z,8Z)) | exact mass match | 265275.1298 | 205493.4159 | 202323.7249 | 4.01E-10    | 9.76E-10    | 0.257279474 | 0.397318265 | 1.005832036 | 0.715748852 | 0.654358854  | 1.093817021 |
| X51.8_845.574mz_pos | PC(18:3(6Z,9Z,12Z)/22:6(4Z,7Z)) | exact mass match | 36346.241   | 65336.46638 | 56077.55097 | 0.0000133   | 0.000736591 | 0.851706627 | 8.727370397 | 6.605681745 | 1.697412444 | 1.350473552  | 1.256901656 |
| X54.6_875.62mz_pos  | PC(20:2(11Z,14Z)/22:6(4Z,7Z))   | exact mass match | 32221.75079 | 107284.1925 | 207330.0093 | 0.0000661   | 0.004316824 | 0.962595293 | 13.94799978 | 7.343236281 | 3.1080313   | 5.572722508  | 0.557722244 |
| X53_873.605mz_pos   | PC(20:3(5Z,8Z,11Z)/22:6(4Z,7Z)) | exact mass match | 212850.1499 | 398116.1436 | 507593.1489 | 0.00072513  | 0.001751812 | 0.558639595 | 6.208193255 | 4.295721624 | 1.685579858 | 2.058640926  | 0.818782837 |
| X8.8_518.353mz_pos  | PC(O-1:0/O-16:0)[U]             | exact mass match | 462340.0827 | 391494.1408 | 380324.3266 | 6.65E-10    | 2.05E-08    | 0.283789984 | 0.588991448 | 0.81754405  | 0.775083611 | 0.714758879  | 1.084398717 |
| X11.3_546.385mz_pos | PC(O-1:0/O-18:0)                | exact mass match | 27276.56695 | 20869.95584 | 17761.50512 | 4.09E-10    | 3.99E-10    | 0.0000933   | 0.801133707 | 2.520458945 | 0.766049827 | 0.599857388  | 1.277053251 |
| X12.3_560.401mz_pos | PC(O-10:0/O-10:0)[U]            | exact mass match | 29252.90649 | 20547.76145 | 18794.01773 | 4.04E-10    | 6.55E-10    | 0.135517571 | 0.769077676 | 1.977658284 | 0.708066593 | 0.591648718  | 1.196768576 |
| X19.5_454.328mz_pos | PC(O-12:0/O-2:0)                | exact mass match | 175654.0425 | 97289.11194 | 92784.40188 | 0.0000246   | 0.002282701 | 0.953787035 | 9.62633235  | 1.31684578  | 0.526610472 | 0.460688093  | 1.143095468 |
| X16.7_736.531mz_pos | PC(O-14:0/18:3(9Z,12Z,15Z))     | exact mass match | 14454.85805 | 7477.824334 | 5545.73149  | 3.99E-10    | 0.00000435  | 0.674944514 | 2.650048544 | 2.780599408 | 0.556184884 | 0.379337289  | 1.466201453 |
| X21.4_468.343mz_pos | PC(O-14:0/O-1:0)                | exact mass match | 182059.3965 | 128439.8064 | 129895.4755 | 0.000302092 | 0.002728627 | 0.758186865 | 5.196458945 | 1.301697683 | 0.666237265 | 0.619850572  | 1.074835284 |
| X13.5_574.416mz_pos | PC(O-16:0/O-5:0)[U]             | exact mass match | 29327.55206 | 19368.53666 | 13594.97683 | 3.99E-10    | 3.99E-10    | 0.000000541 | 1.266107067 | 1.464321279 | 0.666534177 | 0.430835816  | 1.547072347 |
| X21.6_480.004mz_pos | PC(O-16:1(9E)/0:0)[U]           | exact mass match | 25102.91517 | 19496.86666 | 14863.39561 | 0.00000163  | 0.00000108  | 0.128902655 | 1.140300063 | 2.350351654 | 0.778640533 | 0.555258524  | 1.402302711 |
| X22_525.399mz_pos   | PC(O-18:1(9E)/0:0)[S]           | exact mass match | 132494.6475 | 99247.68307 | 112365.6596 | 4.04E-10    | 4.05E-10    | 0.019018788 | 1.370708198 | 1.238171787 | 0.705342868 | 0.73137826   | 0.964402289 |
| X17.3_544.37mz_pos  | PC(O-18:1(9E)/O-1:0)[U]         | exact mass match | 32279.81944 | 24398.04419 | 16977.93218 | 2.83E-09    | 1.59E-09    | 0.035461699 | 1.561946493 | 2.359033673 | 0.754677009 | 0.490658365  | 1.538090579 |
| X16.4_548.365mz_pos | PC(O-18:2(9Z,12Z)/2:0)          | exact mass match | 11211.65686 | 8521.103956 | 9009.834908 | 0.0000476   | 0.000000684 | 0.024422754 | 1.812076351 | 2.009348676 | 0.789159005 | 0.3717160001 | 1.056211527 |
| X27.1_494.354mz_pos | PC(P-17:0/0:0)                  | exact mass match | 16561.20121 | 10788.64457 | 6255.490288 | 5.12E-10    | 3.99E-10    | 0.00014022  | 6.156451895 | 5.445809623 | 0.666770908 | 0.731049998  | 1.796983999 |
| X26.4_483.003mz_pos | PD 0325901                      | exact mass match | 6936.490652 | 4723.418336 | 4747.673539 | 0.000115201 | 5.18E-10    | 0.00001447  | 2.262032698 | 3.546640072 | 0.769330763 | 0.659007634  | 1.167407968 |
| X24.7_755.531mz_pos | PE(14:0/22:5(4Z,7Z,10Z,13Z))    | exact mass match | 542939.594  | 440750.9466 | 333777.2596 | 4.07E-10    | 3.99E-10    | 0.001467775 | 0.641960964 | 1.412037734 | 0.746489828 | 0.530266688  | 1.407922317 |
| X21.3_674.504mz_pos | PE(14:0/P-18:1(11Z))            | exact mass match | 46062.24211 | 31189.05542 | 28560.61486 | 3.99E-10    | 3.99E-10    | 0.002726029 | 0.718663323 | 1.699095895 | 0.674742469 | 0.567534595  | 1.188901037 |
| X21.3_632.431mz_pos | PE(14:1(9Z)/14:1(9Z))           | exact mass match | 27963.53071 | 21526.55143 | 17995.35628 | 0.00000165  | 5.49E-09    | 0.004698693 | 0.920167877 | 1.624489895 | 0.772827402 | 0.596596144  | 1.295394565 |
| X37.7_646.427mz_neg | PE(14:1(9Z)/15:0)               | exact mass match | 515708.9129 | 1006541.54  | 966365.639  | 0.000446326 | 0.00000125  | 0.011218986 | 5.080845803 | 4.968008947 | 1.826441419 | 1.66410665   | 1.0975507   |
| X20.1_718.53mz_pos  | PE(16:0/18:1(9Z))               | exact mass match | 4658194.075 | 3290001.53  | 2997956.293 | 3.99E-10    | 4.43E-10    | 0.198867749 | 0.427472003 | 0.918514328 | 0.676607379 | 0.616430068  | 1.097622284 |
| X15.9_688.484mz_pos | PE(16:1(9Z)/16:1(9Z))[U]        | exact mass match | 25180.01468 | 19146.27596 | 15700.62754 | 4.3E-10     | 3.99E-10    | 0.0000597   | 0.893282313 | 2.358271567 | 0.759287324 | 0.572268966  | 1.326801503 |
| X13.8_676.483mz_pos | PE(17:0/14:1(9Z))               | exact mass match | 424397.9424 | 321941.9345 | 303729.1869 | 4E-10       | 4.07E-10    | 0.047641876 | 0.346438777 | 1.056221702 | 0.695755895 | 0.611093144  | 1.13854312  |
| X6.5_760.496mz_pos  | PE(18:3(6Z,9Z,12Z)/20:5(5Z,8Z)) | exact mass match | 28350.76361 | 9002.270271 | 7109.527615 | 0.0000331   | 0.00000117  | 0.040775267 | 2.265966672 | 6.730419611 | 0.344534173 | 0.234076334  | 1.471888109 |
| X11.6_736.468mz_pos | PE(18:3(6Z,9Z,12Z)/P-16:0)      | exact mass match | 42710.27568 | 33078.52137 | 30006.51113 | 0.0000199   | 0.000283912 | 0.642036669 | 1.195970054 | 1.800136215 | 0.767201208 | 0.639099814  | 1.200440354 |
| X7.3_810.511mz_pos  | PE(20:5(5Z,8Z,11Z,14Z,17Z))     | exact mass match | 12001.5087  | 4098.490772 | 3854.147855 | 1.01E-09    | 1.21E-08    | 0.182109236 | 2.575345978 | 12.04330013 | 0.413921612 | 0.313908021  | 1.318607949 |
| X28_906.671mz_pos   | PE(22:1(13Z)/24:1(15Z))         | exact mass match | 32503.76866 | 19763.62695 | 12965.36897 | 3.99E-10    | 3.99E-10    | 0.001889257 | 1.722496979 | 2.803190867 | 0.615528133 | 0.373066835  | 1.649913837 |
| X23.3_878.64mz_pos  | PE(22:4(7Z,10Z,13Z,16Z)/2:0)    | exact mass match | 2225326.967 | 1577182.918 | 1360293.111 | 3.99E-10    | 4.11E-10    | 0.385810649 | 0.51728168  | 1.15784591  | 0.656373444 | 0.563461847  | 1.164894211 |
| X7.6_810.512mz_pos  | PE(22:6(4Z,7Z,10Z,13Z,16Z))     | exact mass match | 9913.441251 | 3616.374291 | 2979.772923 | 9.59E-09    | 5E-10       | 0.004047594 | 2.071541755 | 12.51337281 | 0.451492844 | 0.304544019  | 1.482520805 |
| X13.2_455.321mz_pos | PE(P-16:0/0:0)                  | exact mass match | 32292.4088  | 23784.7336  | 25278.1343  | 2.82E-08    | 1.26E-09    | 0.010234953 | 1.712184235 | 1.236410267 | 0.726744784 | 0.713963556  | 1.017901366 |
| X20.8_642.445mz_pos | PE(P-16:0/12:0)                 | exact mass match | 12138.92972 | 8724.158505 | 3957.857611 | 0.0000118   | 0.00037039  | 0.444488576 | 4.713364221 | 0.749927556 | 0.633605511 | 2.231561234  | 1.164894211 |
| X18.5_660.489mz_pos | PE(P-16:0/15:1(9Z))             | exact mass match | 4158706.048 | 2949169.349 | 2780379.141 | 3.99E-10    | 4.03E-10    | 0.110095743 | 0.514230312 | 0.797461066 | 0.673870904 | 0.615159053  | 1.095441742 |
| X12.8_708.5mz_pos   | PE(P-16:0/17:2(9Z,12Z))         | exact mass match | 8103.400684 | 4603.203266 | 3784.662145 | 6.37E-10    | 4.85E-10    | 0.018935477 | 1.457902211 | 6.226391346 | 0.657370488 | 0.474808003  | 1.38449749  |
| X21.1_631.481mz_pos | PE-Cer(d14:1(4E)/18:1(9Z))      | exact mass match | 33306.44808 | 15736.76271 | 8789.030028 | 0.004590793 | 0.000188036 | 0.092914015 | 2.573585025 | 3.707656333 | 0.490464588 | 0.248112458  | 1.976783402 |
| X18_598.411mz_pos   | Pectenolone                     | exact mass match | 27680.23323 | 21229.6062  | 16326.36426 | 0.00000154  | 0.000079    |             |             |             |             |              |             |



|                     |                                |                  |             |             |             |             |             |             |             |             |             |              |             |
|---------------------|--------------------------------|------------------|-------------|-------------|-------------|-------------|-------------|-------------|-------------|-------------|-------------|--------------|-------------|
| X17.4_479.66mz_pos  | Pentaglutamyl folate           | exact mass match | 16467.32078 | 11623.56416 | 10382.52174 | 9.75E-10    | 1.08E-09    | 0.044744301 | 1.537704513 | 3.086530928 | 0.717134151 | 0.589416528  | 1.216684835 |
| X37.7_464.145mz_neg | Perphenazine sulfoxide         | exact mass match | 36050.32046 | 57297.71079 | 272361.2144 | 0.0000839   | 0.004514127 | 0.9539384   | 9.152196118 | 8.155035526 | 1.517242296 | 6.448381508  | 0.235290405 |
| X2.2_211.083mz_neg  | PERSEITOL                      | exact mass match | 14697.40892 | 3934.237839 | 3839.365102 | 0.0000933   | 0.001687635 | 0.799258983 | 0.489504416 | 3.593400783 | 0.300022054 | 0.266125446  | 1.127370788 |
| X13.7_553.303mz_neg | PG(10:0/10:0)[U]               | exact mass match | 5527.044572 | 11213.90651 | 13785.33357 | 0.000603172 | 0.000702696 | 0.409673816 | 1.59717863  | 0.858368525 | 1.884438929 | 1.94284794   | 0.969936396 |
| X20.8_635.433mz_pos | PG(12:0/15:0)                  | exact mass match | 71706.99931 | 50957.78664 | 58719.73784 | 4E-10       | 3.99E-10    | 0.000592751 | 2.439371634 | 3.432673037 | 0.676628457 | 0.709324637  | 0.95388099  |
| X20.4_679.459mz_pos | PG(12:0/17:1(9Z))              | exact mass match | 74673.3541  | 50887.48061 | 61326.08165 | 3.99E-10    | 3.99E-10    | 0.012611272 | 2.578922048 | 3.686718571 | 0.648490661 | 0.70891203   | 0.914768877 |
| X9.1_687.424mz_pos  | PG(12:0/18:4(6Z,9Z,12Z,15Z))   | exact mass match | 58654.13041 | 37273.44452 | 25277.67278 | 3.99E-10    | 3.99E-10    | 0.016045492 | 2.980179878 | 3.35384467  | 0.622537264 | 0.396771606  | 1.569006589 |
| X10.3_715.449mz_pos | PG(12:0/20:4(5Z,8Z,11Z,14Z))   | exact mass match | 51025.46681 | 36978.56463 | 24501.03577 | 3.99E-10    | 4.01E-10    | 0.037797534 | 6.209945173 | 5.199326173 | 0.711599818 | 0.4444404986 | 1.601241753 |
| X20.7_679.459mz_pos | PG(13:0/16:1(9Z))              | exact mass match | 108382.0797 | 71571.85253 | 94684.9382  | 3.99E-10    | 4.55E-10    | 0.225767455 | 3.827982397 | 4.25130254  | 0.624399172 | 0.748737766  | 0.833935726 |
| X14.9_761.526mz_pos | PG(13:0/22:2(13Z,16Z))         | exact mass match | 16534.9014  | 10131.00552 | 10867.96128 | 0.000000174 | 0.00000418  | 0.803775499 | 0.94635487  | 2.535855934 | 0.632722247 | 0.612628499  | 1.032799238 |
| X20.7_656.451mz_pos | PG(14:0/12:0)                  | exact mass match | 32410.4632  | 24824.47705 | 14149.95243 | 0.000000569 | 0.000000147 | 0.065527019 | 2.700135385 | 3.694923544 | 0.763935494 | 0.414613336  | 1.84252514  |
| X13.3_497.275mz_neg | PG(17:0/0:0)                   | exact mass match | 305964.5815 | 170175.0641 | 175135.0305 | 0.003093026 | 0.00429612  | 0.548945783 | 1.040654251 | 1.768674366 | 0.549958011 | 0.523168059  | 1.051207162 |
| X25.9_831.603mz_pos | PG(18:0/22:2(13Z,16Z))         | exact mass match | 13141.62852 | 9013.554983 | 9887.743368 | 4.07E-10    | 3.99E-10    | 0.000016    | 1.59430306  | 1.904621317 | 0.710717675 | 0.501869653  | 1.012606361 |
| X8.2_539.334mz_pos  | PG(20:1(11Z)/0:0)              | exact mass match | 16934.91515 | 10731.92137 | 9625.402882 | 5.01E-10    | 4.04E-10    | 0.004593172 | 2.338206799 | 3.702392171 | 0.651042833 | 0.537774561  | 1.21062408  |
| X21.1_909.654mz_pos | PG(22:0/22:2(13Z,16Z))         | exact mass match | 252156.1887 | 150055.6617 | 122705.5384 | 3.99E-10    | 3.99E-10    | 0.026598816 | 0.603581921 | 1.894000798 | 0.556078487 | 0.420846119  | 1.32133448  |
| X9.2_567.359mz_pos  | PG(22:1(11Z)/0:0)              | exact mass match | 47519.18735 | 34543.08581 | 31098.26393 | 3.99E-10    | 3.99E-10    | 0.047905864 | 0.624049088 | 2.035911812 | 0.716852213 | 0.598529087  | 1.197689852 |
| X20.7_675.452mz_pos | PG(O-16:0/12:0)                | exact mass match | 30384.44944 | 20381.77746 | 21563.78928 | 4E-10       | 4E-10       | 0.011675042 | 1.217040593 | 1.180369943 | 0.674353951 | 0.654749376  | 1.029942105 |
| X12.8_689.468mz_pos | PG(O-16:0/13:0)                | exact mass match | 106948.3663 | 82369.39933 | 88927.55703 | 4.84E-10    | 1.38E-09    | 0.106058369 | 0.520534084 | 1.083477633 | 0.725094439 | 0.722028974  | 1.004254625 |
| X15.7_703.483mz_pos | PG(O-16:0/14:0)                | exact mass match | 20460.44744 | 12206.99032 | 14115.91478 | 3.99E-10    | 1.55E-09    | 0.455056463 | 0.98748052  | 1.173964491 | 0.610561066 | 0.636013568  | 0.959981196 |
| X14.9_717.499mz_pos | PG(O-16:0/15:0)                | exact mass match | 19811.23622 | 13665.29574 | 14223.59977 | 0.00000612  | 0.001849848 | 0.992898767 | 0.833428352 | 2.40490181  | 0.694799975 | 0.659334284  | 1.053790151 |
| X21.7_759.547mz_pos | PG(O-18:0/18:3(6Z,9Z,12Z))     | exact mass match | 106671.281  | 72131.23518 | 74704.5431  | 3.99E-10    | 3.99E-10    | 0.0000893   | 1.157014683 | 2.013918388 | 0.640923693 | 0.606304063  | 1.057099451 |
| X14.2_353.234mz_neg | PGE1                           | exact mass match | 5105.808929 | 7836.559724 | 9610.961712 | 0.002134704 | 0.000689093 | 0.270616803 | 1.49342353  | 2.030135133 | 1.532070886 | 1.49925404   | 1.021888783 |
| X17.8_410.319mz_pos | PGF2α diethyl amide            | exact mass match | 28906.22163 | 20568.11011 | 22376.52889 | 5.35E-10    | 4.07E-10    | 0.005406726 | 1.57489638  | 1.293236496 | 0.711925671 | 0.70709543   | 1.006831102 |
| X27.1_395.28mz_neg  | PGF2α isopropyl ester          | exact mass match | 7314.947775 | 4378.608741 | 6106.667678 | 0.00000139  | 0.003039437 | 0.950315456 | 1.083308902 | 1.766073175 | 0.70368881  | 0.74686219   | 0.942193647 |
| X25.9_527.029mz_pos | Ph4Cl-Ph4Cl-OH                 | exact mass match | 22532.23984 | 17178.54778 | 19311.15895 | 0.0000797   | 1.87E-08    | 0.001324331 | 2.318890174 | 1.807948864 | 0.792605764 | 0.792233366  | 1.000470061 |
| X12.1_618.405mz_pos | Phorbol 12-tiglate 13-deca     | exact mass match | 89060.17046 | 73970.8111  | 64101.45694 | 5.11E-08    | 0.000000129 | 0.143119874 | 0.729356843 | 1.039977844 | 0.79223624  | 0.626679457  | 1.264180964 |
| X8.4_455.955mz_pos  | Phosphiphen                    | exact mass match | 7137.747425 | 4296.751421 | 2915.403819 | 9.72E-10    | 8.62E-10    | 0.036133904 | 3.16765271  | 7.406858102 | 0.702763692 | 0.424290949  | 1.656324966 |
| X16.4_395.999mz_pos | Phosphonoformyl-CMP            | exact mass match | 15271.75326 | 10336.12323 | 2710.721088 | 0.00405052  | 0.000237673 | 0.275074287 | 5.660940416 | 6.850436803 | 0.704388103 | 0.187319636  | 3.760353784 |
| X7.4_497.151mz_neg  | Phylloflavan                   | exact mass match | 7162.720413 | 12867.43916 | 3052.6199   | 0.002468977 | 5.17E-10    | 0.000001114 | 14.62989304 | 11.55834356 | 1.781033047 | 0.450082539  | 3.957125401 |
| X10.3_493.19mz_pos  | Physalin C                     | exact mass match | 10745.46614 | 14637.42638 | 6485.862219 | 0.000099    | 0.000311901 | 0.475014184 | 7.685345298 | 6.437525249 | 1.335562065 | 0.577551516  | 2.312440885 |
| X21.6_825.554mz_pos | PI(12:0/21:0)                  | exact mass match | 42197.82703 | 26430.34954 | 37362.41572 | 3.99E-10    | 3.99E-10    | 0.02866009  | 6.612414786 | 10.78605087 | 0.620310991 | 0.789342214  | 0.785858123 |
| X12.4_868.583mz_pos | PI(13:0/22:1(11Z))             | exact mass match | 21201.10297 | 14060.24094 | 13649.33106 | 2.67E-08    | 0.0000184   | 0.848233546 | 1.066489962 | 2.863866227 | 0.66973386  | 0.595164457  | 1.125292098 |
| X6.1_727.439mz_pos  | PI(14:0/12:0)                  | exact mass match | 16326.66839 | 5023.827503 | 4464.900497 | 0.00000584  | 0.000494952 | 0.863665864 | 1.923619694 | 6.847002258 | 0.351979363 | 0.263781539  | 1.334359347 |
| X33.8_853.527mz_pos | PI(15:1(9Z)/22:4(7Z,10Z,13Z))  | exact mass match | 161531.8963 | 280914.2027 | 251441.0935 | 0.000135315 | 0.001478248 | 0.733161188 | 2.790739069 | 1.766985873 | 1.58246846  | 1.315750028  | 1.202712085 |
| X14.9_910.63mz_pos  | PI(16:0/22:1(11Z))             | exact mass match | 23235.35263 | 13588.81519 | 9753.170345 | 1.01E-09    | 7.59E-08    | 0.376878162 | 2.248722124 | 2.598201221 | 0.594168729 | 0.399313196  | 1.487976694 |
| X17.6_924.645mz_pos | PI(17:0/22:1(11Z))             | exact mass match | 41946.13018 | 26785.81908 | 21699.86727 | 3.99E-10    | 3.99E-10    | 0.000349239 | 0.559274178 | 2.489283022 | 0.643116314 | 0.481253471  | 1.33633595  |
| X19.3_921.634mz_pos | PI(18:0/22:1(11Z))             | exact mass match | 18492.44323 | 11589.02169 | 13840.50208 | 4E-10       | 1.41E-08    | 0.727303969 | 1.151151767 | 1.583040132 | 0.63977255  | 0.68382265   | 0.935582566 |
| X21.3_952.677mz_pos | PI(19:0/22:1(11Z))             | exact mass match | 100944.9572 | 63400.03709 | 50820.3153  | 3.99E-10    | 3.99E-10    | 0.001684459 | 0.591311963 | 2.106284865 | 0.601409974 | 0.435165152  | 1.382026965 |
| X24.8_963.681mz_pos | PI(21:0/22:1(11Z))             | exact mass match | 15297.44775 | 8892.006869 | 10683.09415 | 3.99E-10    | 3.99E-10    | 0.000372809 | 2.219940016 | 3.357008613 | 0.603931544 | 0.645134957  | 0.936132103 |
| X19.9_767.512mz_pos | PI(O-16:0/14:1(9Z))            | exact mass match | 50306.90669 | 31291.24483 | 43475.57687 | 3.99E-10    | 3.99E-10    | 0.002668322 | 4.41321884  | 5.256163351 | 0.609447618 | 0.757973512  | 0.804048701 |
| X15_866.604mz_pos   | PI(O-16:0/20:2(11Z,14Z))       | exact mass match | 24526.82589 | 16527.99837 | 13032.03397 | 5.2E-09     | 0.000000483 | 0.450465521 | 1.117339218 | 2.585861925 | 0.680280853 | 0.497157448  | 1.368340866 |
| X18.9_894.635mz_pos | PI(O-16:0/22:2(13Z,16Z))       | exact mass match | 35901.90776 | 20925.92763 | 14724.13467 | 3.99E-10    | 3.99E-10    | 0.0000277   | 0.905795123 | 3.399382476 | 0.591266786 | 0.377048192  | 1.527630921 |
| X7_871.564mz_pos    | PI(O-18:0/20:5(5Z,8Z,11Z,14Z)) | exact mass match | 11198.67843 | 3786.905646 | 2538.086576 | 0.000193694 | 0.000014    | 0.083526533 | 6.309570192 | 10.27161026 | 0.403496853 | 0.231195627  | 1.74526045  |
| X23_905.64mz_pos    | PI(O-18:0/22:2(13Z,16Z))       | exact mass match | 199207.5195 | 136505.7775 | 147261.5278 | 3.99E-10    | 3.99E-10    | 0.107618732 | 1.74828831  | 1.626352611 | 0.637352611 | 0.644068528  | 0.989572668 |
| X27.4_950.698mz_pos | PI(O-20:0/22:2(13Z,16Z))       | exact mass match | 97186.0431  | 60932.56769 | 40703.26733 | 3.99E-10    | 3.99E-10    | 0.0000301   | 1.082787737 | 2.200418129 | 0.60215813  | 0.366381236  | 1.643528847 |
| X8_966.639mz_pos    | PI(O-20:0/22:6(4Z,7Z,10Z,13Z)) | exact mass match | 25549.75436 | 9868.15589  | 4309.091668 | 4.01E-10    | 4.03E-10    | 0.021091276 | 3.456723739 | 10.67123837 | 0.412055429 | 0.169047775  | 2.437508737 |
| X20_767.512mz_pos   | PI(P-16:0/14:0)                | exact mass match | 57440.68392 | 35642.73873 | 50951.90765 | 3.99E-10    | 3.99E-10    | 0.0262674   | 4.362918393 | 4.881054265 | 0.600327654 | 0.767057162  | 0.78263744  |
| X21.3_891.624mz_pos | PI(P-20:0/19:1(9Z))            | exact mass match | 67635.39587 | 42307.18905 | 53861.32151 | 3.99E-10    | 3.99E-10    | 0.074711436 | 1.370681268 | 1.828423801 | 0.601083631 | 0.689146387  | 0.872214731 |
| X18.2_543.367mz_pos | Pikromycin                     | exact mass match | 77869.55441 | 52794.67746 | 43934.27833 | 3.99E-10    | 3.99E-10    | 0.008347616 | 0.535300596 | 1.432428429 | 0.654296164 | 0.494869914  | 1.322157896 |
| X41_744.488mz_pos   | Piloceraine                    | exact mass match | 263501.1351 | 499057.5119 | 478354.5425 | 5.11E-08    | 0.000493525 | 0.958969221 | 2.287983854 | 0.629016249 | 1.731425887 | 1.559735242  | 1.110076787 |
| X11.4_287.138mz_pos | Pilosine                       | exact mass match | 5811.908219 | 10487.09754 | 9976.392901 | 0.0000325   | 0.000720522 | 0.758948414 | 6.92189784  | 3.995147641 | 1.712766896 | 1.457989481  | 1.174745715 |
| X16.4_626.157mz_pos | Pinotin A                      | exact mass match | 78025.19922 | 42246.74888 | 20312.09909 | 0.0000424   | 0.0000873   | 0.358217939 | 2.600070059 | 3.414757383 | 0.525107718 | 0.235268005  | 2.231955499 |
| X37.7_398.153mz_neg | Pipazethate                    | exact mass match | 32452.28035 | 56260.77226 | 70122.07237 | 0.000151191 | 0.0000181   | 0.107360837 | 4.331538632 | 3.523220868 | 1.746813506 | 1.881394514  | 0.928467418 |
| X8.6_324.193mz_pos  | PIPERIDOLATE                   | exact mass match | 17341.404   | 10501.54395 | 14023.96083 | 0.000350295 | 0.002206053 | 0.698172252 | 3.059475128 | 5.646124552 | 0.640421995 | 0.725757977  | 0.882418127 |
| X12.6_340.269mz_pos | Piptanthine                    | exact mass match | 60006.35986 | 42358.81805 | 37209.41101 | 3.99E-10    | 3.99E-10    | 0.000569536 | 1.164488571 | 0.3959913   | 0.684943209 | 0.554875059  | 1.234409797 |
| X20.4_481.007mz_pos | Ponceau SX                     | exact mass match | 45001.21697 | 35440.8335  |             |             |             |             |             |             |             |              |             |

|                     |                              |                      |             |              |             |             |             |             |             |             |             |             |             |
|---------------------|------------------------------|----------------------|-------------|--------------|-------------|-------------|-------------|-------------|-------------|-------------|-------------|-------------|-------------|
| X14.7_300.065mz_pos | PPM-18                       | exact mass match     | 12993.79855 | 8846.77241   | 8919.772717 | 0.00010622  | 0.001846689 | 0.801627424 | 5.530041292 | 3.725693046 | 0.703392172 | 0.637618309 | 1.103155543 |
| X16.4_858.311mz_pos | Pradimicin A                 | exact mass match     | 40180.29946 | 19640.92448  | 8864.256666 | 0.000307814 | 0.000587589 | 0.456587743 | 3.707099525 | 7.582701314 | 0.478193479 | 0.203923149 | 2.34496908  |
| X18.1_425.25mz_pos  | Pravastatin                  | exact mass match     | 88684.48342 | 136381.3763  | 63155.83577 | 0.000605209 | 0.004195088 | 0.760630905 | 7.87548108  | 6.092011635 | 1.429444688 | 0.62090988  | 2.302177392 |
| X27.9_387.254mz_neg | Pregn-4-en-20-one, 3b,1      | exact mass match     | 9511.655483 | 6194.569047  | 7148.663468 | 0.0000116   | 0.002273748 | 0.986086126 | 1.401319019 | 2.313232087 | 0.727331795 | 0.679730339 | 1.070209912 |
| X16.4_209.117mz_pos | Primin                       | MS/MS spectrum match | 911990.0857 | 628369.5706  | 602887.4005 | 0.0000188   | 0.000427552 | 0.723725878 | 0.952049735 | 0.544817987 | 0.617802703 | 0.604914224 | 1.021306291 |
| X8.6_393.063mz_pos  | Prochloraz                   | exact mass match     | 27025.60782 | 15661.63346  | 16309.77433 | 0.00010409  | 0.001046601 | 0.697317535 | 4.385425589 | 2.799378439 | 0.60115338  | 0.537474935 | 1.11847705  |
| X16.4_604.076mz_pos | Prochlorperazine mesylate    | exact mass match     | 13341.27629 | 10089.29199  | 10663.14677 | 0.00000474  | 0.000115492 | 0.639010318 | 1.768536053 | 4.266454945 | 0.776157837 | 1.740555235 | 1.048075552 |
| X37.7_450.123mz_neg | Prochlorperazine sulfone     | exact mass match     | 5549.023838 | 9665.222034  | 10503.17577 | 0.001004323 | 0.00000534  | 0.019712016 | 3.17903558  | 3.337486614 | 1.674667396 | 0.493646465 | 1.121193961 |
| X11.1_502.358mz_pos | Propapyriogenin A2           | exact mass match     | 34328.25409 | 26149.07407  | 24325.23005 | 4.02E-10    | 4.04E-10    | 0.020331305 | 0.713827944 | 1.409868182 | 0.760981393 | 0.651135307 | 1.168699324 |
| X10.3_386.067mz_neg | Propiconazole                | exact mass match     | 6185.99314  | 8452.435924  | 3891.040466 | 0.003052593 | 0.00168914  | 5.89E-08    | 6.046805182 | 5.503316061 | 1.369102531 | 0.595846621 | 2.297743216 |
| X20.3_686.137mz_pos | Propidium Iodide Solution    | exact mass match     | 16438.58847 | 12681.79715  | 9506.38263  | 0.000168869 | 0.00000715  | 0.05929307  | 2.293818815 | 2.632739877 | 0.784126667 | 0.548822305 | 1.428744168 |
| X23.1_514.026mz_pos | Protogonyautoxin 3           | exact mass match     | 169841.798  | 142525.022   | 117832.9987 | 1.97E-08    | 8.38E-10    | 0.007754531 | 0.485669602 | 1.25984978  | 0.784482273 | 0.605869565 | 1.294803896 |
| X32.1_662.292mz_pos | Protorifamycin I             | exact mass match     | 23289.21466 | 49266.65657  | 53954.84568 | 0.000154123 | 0.000625172 | 0.550591004 | 1.827573616 | 5.870358149 | 2.033073608 | 1.979736697 | 1.026941416 |
| X37.7_698.398mz_neg | PS(12:0/18:4(6Z,9Z,12Z,15Z)) | exact mass match     | 23842.95677 | 51960.8862   | 36772.97402 | 0.00038403  | 0.000000153 | 0.002564704 | 7.135454942 | 8.890499595 | 2.153419559 | 1.325123616 | 1.625070697 |
| X40.7_744.487mz_pos | PS(13:0/20:3(8Z,11Z,14Z))    | exact mass match     | 87312.63095 | 203785.0336  | 170408.0689 | 2.02E-08    | 0.0000645   | 0.985796821 | 2.26378569  | 1.456572894 | 2.14639512  | 1.657241082 | 1.295161666 |
| X11_752.472mz_pos   | PS(14:1(9Z)/20:5(5Z,8Z,11Z)) | exact mass match     | 21351.91088 | 15389.24651  | 16771.71907 | 0.000000256 | 0.00000157  | 0.605611279 | 3.196180548 | 3.458954788 | 0.727195296 | 0.59552353  | 1.221102541 |
| X12.1_736.505mz_pos | PS(16:0/16:0)                | exact mass match     | 647186.1748 | 487901.3949  | 451480.3016 | 3.99E-10    | 3.99E-10    | 0.073364854 | 0.329022539 | 1.080754693 | 0.679235228 | 0.599027237 | 1.13389707  |
| X39.7_788.544mz_pos | PS(18:1(9Z)/18:1(9Z))U       | exact mass match     | 45237.08269 | 125987.9942  | 228575.8801 | 0.001725132 | 0.0000088   | 0.093959319 | 6.77611179  | 7.205339347 | 2.591415538 | 4.523904869 | 0.572827151 |
| X25.9_848.63mz_pos  | PS(19:0/21:0)                | exact mass match     | 115731.2175 | 79418.94008  | 55176.31227 | 3.99E-10    | 3.99E-10    | 0.000000868 | 0.892870268 | 1.289078869 | 0.655117334 | 0.413220416 | 1.585394402 |
| X23.2_546.282mz_neg | PS(20:3(8Z,11Z,14Z)/0:0)     | exact mass match     | 5397.449904 | 6934.206641  | 9124.237288 | 0.001834914 | 0.004739772 | 0.642719229 | 5.018853434 | 4.135492111 | 1.300418784 | 1.353201423 | 0.960994248 |
| X20.9_910.656mz_pos | PS(21:0/22:1(11Z))           | exact mass match     | 30027.89377 | 16150.2085   | 11715.16518 | 3.99E-10    | 3.99E-10    | 0.003532607 | 0.445246339 | 3.722865258 | 0.551761356 | 0.369010248 | 1.495246704 |
| X23.9_764.536mz_pos | PS(22:0/12:0)                | exact mass match     | 396706.0005 | 300411.879   | 273057.0584 | 3.99E-10    | 4.01E-10    | 0.025969329 | 0.473449357 | 1.093132524 | 0.700207532 | 0.592435372 | 1.181913784 |
| X14.1_940.64mz_pos  | PS(22:0/22:1(11Z))           | exact mass match     | 24161.46971 | 14184.75588  | 9740.96974  | 4.04E-10    | 4.09E-10    | 0.025168063 | 1.632221489 | 3.79710667  | 0.598370551 | 0.381959965 | 1.566579239 |
| X13.9_720.51mz_pos  | PS(O-16:0/16:1(9Z))          | exact mass match     | 528128.6444 | 400840.7455  | 374185.6345 | 3.99E-10    | 4.03E-10    | 0.043428024 | 0.373071979 | 0.977989843 | 0.68567048  | 0.608228669 | 1.127323514 |
| X16.8_734.525mz_pos | PS(O-16:0/17:1(9Z))          | exact mass match     | 1111891.254 | 786818.6995  | 679934.0866 | 3.99E-10    | 3.99E-10    | 0.01905885  | 0.326729243 | 1.024788836 | 0.648074229 | 0.536826763 | 1.207231595 |
| X6.1_790.507mz_pos  | PS(O-16:0/20:5(5Z,8Z,11Z))   | exact mass match     | 16037.18395 | 50625.277881 | 3292.363796 | 0.00000841  | 0.000142553 | 0.613521061 | 3.0533387   | 8.330564776 | 0.35975927  | 0.202593406 | 1.775769891 |
| X26.7_804.603mz_pos | PS(O-16:0/22:1(11Z))         | exact mass match     | 86224.18875 | 62743.94372  | 43741.60086 | 3.99E-10    | 3.99E-10    | 0.00000455  | 0.74046015  | 1.831529728 | 0.702423522 | 0.445484929 | 1.579953516 |
| X23.3_690.473mz_pos | PS(P-16:0/14:1(9Z))          | exact mass match     | 14771.45379 | 10954.67403  | 7910.027238 | 0.000462701 | 0.000211987 | 0.257793123 | 2.371939535 | 3.250178486 | 0.759540247 | 0.513056723 | 1.480421586 |
| X19.1_718.494mz_pos | PS(P-16:0/16:1(9Z))          | exact mass match     | 11115.70981 | 6684.358487  | 4660.080871 | 0.000000236 | 0.000000109 | 0.07266213  | 5.866226831 | 5.450889678 | 0.646934334 | 0.417059077 | 1.551181523 |
| X18_838.599mz_pos   | PS(P-20:0/19:1(9Z))          | exact mass match     | 28944.77079 | 16481.26683  | 12563.13091 | 3.99E-10    | 3.99E-10    | 0.026133174 | 0.933674561 | 5.067099419 | 0.578567288 | 0.405353364 | 1.427315868 |
| X18.4_703.981mz_pos | Psamaplin A                  | exact mass match     | 42631.67149 | 27775.21053  | 22951.12072 | 4.01E-10    | 4.11E-10    | 0.040510114 | 3.150852737 | 3.773587617 | 0.646738835 | 0.495670945 | 1.30477455  |
| X16.6_866.604mz_pos | PubChem:(100928965)          | Sirius match         | 28103.71617 | 17554.53317  | 14872.85307 | 3.99E-10    | 3.99E-10    | 0.007614685 | 0.66031068  | 2.422494512 | 0.633336471 | 0.492677569 | 1.285498986 |
| X29.9_447.312mz_neg | PubChem:(101300969)          | Sirius match         | 23806.79818 | 11431.04914  | 14278.74982 | 5.54E-08    | 0.004453381 | 0.600329735 | 2.112764209 | 2.324184508 | 0.522965881 | 0.559073132 | 0.93541587  |
| X19.3_877.608mz_pos | PubChem:(101402222)          | Sirius match         | 212381.7041 | 141487.9057  | 157695.3455 | 3.99E-10    | 3.99E-10    | 0.056262694 | 0.894698351 | 1.131702876 | 0.62217202  | 0.645832938 | 0.963363718 |
| X34.6_578.25mz_pos  | PubChem:(101486042)          | Sirius match         | 114136.1713 | 640073.9993  | 1058219.548 | 3.99E-10    | 1.37E-08    | 0.876282629 | 7.009585731 | 6.533157712 | 5.290487436 | 8.664811174 | 0.610571579 |
| X9.8_414.306mz_pos  | PubChem:(102045845)          | Sirius match         | 517854.2381 | 389070.457   | 365600.3863 | 3.99E-10    | 3.99E-10    | 0.047954764 | 0.406815172 | 1.688506332 | 0.683827952 | 0.606830613 | 1.126884401 |
| X10_576.395mz_pos   | PubChem:(102068876)          | Sirius match         | 609960.0834 | 496033.0139  | 467922.9581 | 3.99E-10    | 4.89E-10    | 0.205777782 | 0.479108416 | 0.809494295 | 0.735034939 | 0.656328442 | 1.119919375 |
| X20.8_630.478mz_pos | PubChem:(102077830)          | Sirius match         | 2374941.357 | 1703600.371  | 1605165.941 | 4.01E-10    | 7.1E-10     | 0.200163944 | 0.54711412  | 1.045462043 | 0.667225556 | 0.620300419 | 1.07645511  |
| X16.8_778.551mz_pos | PubChem:(102449434)          | Sirius match         | 410345.7064 | 286815.7084  | 258320.0349 | 3.99E-10    | 3.99E-10    | 0.019229426 | 0.569257446 | 1.075783834 | 0.648199209 | 0.540852646 | 1.198476543 |
| X32.1_367.18mz_pos  | PubChem:(104076871040)       | Sirius match         | 244873.7019 | 382957.456   | 509156.9384 | 0.000272042 | 0.00331383  | 0.807037141 | 3.567977145 | 2.676904999 | 1.425302662 | 1.76531726  | 0.807391789 |
| X16.4_289.106mz_neg | PubChem:(108167690)          | Sirius match         | 166071.1185 | 100266.1803  | 98533.44019 | 0.0000763   | 0.001068104 | 0.737005213 | 1.336617251 | 1.28207984  | 0.630328953 | 0.559714975 | 1.126160603 |
| X34.6_382.182mz_pos | PubChem:(110119094125)       | Sirius match         | 10875.26084 | 66785.00194  | 103562.7866 | 6.15E-10    | 0.000762245 | 0.420779245 | 10.50849101 | 2.82675696  | 5.708018646 | 8.140014439 | 0.701229548 |
| X14.1_354.284mz_pos | PubChem:(111279841)          | Sirius match         | 112958.1224 | 83615.24046  | 75701.35616 | 9.84E-10    | 4.04E-10    | 0.001973357 | 0.992748819 | 0.741212991 | 0.700297145 | 0.578049291 | 1.211484344 |
| X9.7_532.369mz_pos  | PubChem:(11307370)           | Sirius match         | 773013.1418 | 613645.2148  | 589648.8192 | 3.99E-10    | 4.03E-10    | 0.152673356 | 0.667993553 | 0.970827751 | 0.712861662 | 0.655774401 | 1.087053201 |
| X17_602.447mz_pos   | PubChem:(117883478)          | Sirius match         | 2456447.423 | 1738403.97   | 1626412.775 | 3.99E-10    | 4.01E-10    | 0.165028306 | 0.54749429  | 1.165939277 | 0.661768998 | 0.609848585 | 1.085136563 |
| X12_692.479mz_pos   | PubChem:(117904446)          | Sirius match         | 837418.3393 | 626496.0337  | 562095.203  | 3.99E-10    | 3.99E-10    | 0.059478037 | 0.389841441 | 0.991098004 | 0.669542767 | 0.572323923 | 1.169866818 |
| X1.6_213.098mz_pos  | PubChem:(118244276)          | Sirius match         | 19423.91613 | 5342.420308  | 6920.377731 | 0.00067642  | 0.004954424 | 0.780465712 | 2.120717393 | 6.595156555 | 0.29036262  | 0.347672478 | 0.835611359 |
| X19_572.436mz_pos   | PubChem:(118569846)          | Sirius match         | 3123213.006 | 2285057.427  | 2129331.002 | 4.02E-10    | 5.47E-10    | 0.118079411 | 0.434967956 | 1.018091321 | 0.684311186 | 0.613937906 | 1.114626054 |
| X18_819.567mz_pos   | PubChem:(11857590)           | Sirius match         | 108872.5187 | 73332.9637   | 83185.95144 | 3.99E-10    | 3.99E-10    | 0.014433681 | 1.169113008 | 0.956423856 | 0.635746523 | 0.658604064 | 0.965293957 |
| X20.9_476.358mz_pos | PubChem:(121391961139)       | Sirius match         | 130711.6207 | 187774.2738  | 264705.5207 | 0.001867438 | 0.0000272   | 0.042560687 | 6.280755586 | 3.009771301 | 1.3524515   | 1.739999585 | 0.777271162 |
| X20.8_891.624mz_pos | PubChem:(122201608)          | Sirius match         | 67068.77946 | 44421.32485  | 48573.48492 | 3.99E-10    | 3.99E-10    | 0.0000278   | 1.209295827 | 1.656640282 | 0.636202886 | 0.630505058 | 1.009036927 |
| X22.8_905.639mz_pos | PubChem:(122201636)          | Sirius match         | 62164.78132 | 36243.22965  | 50659.12719 | 0.00000144  | 0.00000136  | 0.15135996  | 4.996871858 | 7.131636585 | 0.565353212 | 0.707665331 | 0.798899123 |
| X37.7_452.119mz_neg | PubChem:(122306767)          | Sirius match         | 236347.4965 | 385899.2946  | 431918.581  | 0.000100105 | 0.0000417   | 0.195777653 | 1.277730779 | 1.760548479 | 1.630703206 | 1.664158349 | 0.979896659 |
| X18_792.567mz_pos   | PubChem:(122389449)          | Sirius match         | 1957225.551 | 1387032.623  | 1235231.732 | 3.99E-10    | 3.99E-10    | 0.09859312  | 0.339000931 | 1.020048153 | 0.65510167  | 0.578524008 | 1.132367302 |
| X11.4_353.252mz_pos | PubChem:(123299389)          | Sirius match         | 14705.41615 | 11318.67298  | 12126.40779 | 0.00000235  | 1.46E-08    | 0.008062564 | 1.207364008 | 1.6913524   | 0.782324929 | 0.760350566 | 1.028900305 |
| X13_750.519mz_pos   | PubChem:(123308928)          | Sirius match         | 632411.0694 |              |             |             |             |             |             |             |             |             |             |

|                     |                        |              |             |             |             |             |             |             |             |             |             |             |             |
|---------------------|------------------------|--------------|-------------|-------------|-------------|-------------|-------------|-------------|-------------|-------------|-------------|-------------|-------------|
| X24_355.228mz_neg   | PubChem:(123461402)    | Sirius match | 105347.4783 | 278392.0215 | 435907.9955 | 0.0000019   | 0.00000638  | 0.281861267 | 1.262012625 | 5.650732013 | 2.645833562 | 3.613597746 | 0.732188182 |
| X11_634.437mz_pos   | PubChem:(123609703)    | Sirius match | 825175.2199 | 627155.6258 | 613944.1251 | 3.99E-10    | 4.05E-10    | 0.289290411 | 0.645587487 | 1.034866444 | 0.685226396 | 0.644207824 | 1.063672888 |
| X9.4_488.343mz_pos  | PubChem:(123793792)    | Sirius match | 849914.377  | 673322.5806 | 658157.9666 | 3.99E-10    | 6.25E-10    | 0.421586124 | 0.69587773  | 0.952075991 | 0.714047317 | 0.675419474 | 1.057190893 |
| X23.3_861.614mz_pos | PubChem:(127025305);Pu | Sirius match | 280362.7181 | 191098.9522 | 218774.426  | 3.99E-10    | 3.99E-10    | 0.150764175 | 0.95880048  | 1.450068831 | 0.629754489 | 0.667238534 | 0.943822122 |
| X7.8_384.259mz_pos  | PubChem:(128935389)    | Sirius match | 23240.89323 | 18082.39324 | 16554.93468 | 0.00000227  | 0.00000415  | 0.1551462   | 0.700301439 | 1.610443291 | 0.778407845 | 0.654105382 | 1.190034308 |
| X14.4_486.363mz_pos | PubChem:(129236486)    | Sirius match | 797850.1099 | 599701.841  | 598327.3918 | 3.99E-10    | 3.99E-10    | 0.134811055 | 0.445632842 | 0.974660797 | 0.67443342  | 0.64468113  | 1.046150397 |
| X37.7_431.174mz_neg | PubChem:(129292423)    | Sirius match | 88496.82894 | 135876.5261 | 174120.938  | 0.0000611   | 0.000101042 | 0.344068402 | 1.954552074 | 1.959607213 | 1.526890257 | 1.742023669 | 0.876503737 |
| X10.3_502.358mz_pos | PubChem:(130291918)    | Sirius match | 948276.6324 | 724759.0097 | 691947.936  | 3.99E-10    | 4.04E-10    | 0.313890739 | 0.564112662 | 0.942781245 | 0.681491373 | 0.636035492 | 1.071467522 |
| X9.1_444.316mz_pos  | PubChem:(132555253)    | Sirius match | 858039.8009 | 665964.1946 | 644635.7647 | 3.99E-10    | 4.02E-10    | 0.18572879  | 0.756546498 | 0.860162954 | 0.69791021  | 0.654658772 | 1.066067147 |
| X9.5_370.279mz_pos  | PubChem:(132594475)    | Sirius match | 162886.6297 | 121948.0627 | 112622.2167 | 3.99E-10    | 3.99E-10    | 0.007363546 | 0.855049019 | 0.743982559 | 0.699829352 | 0.599122955 | 1.168089698 |
| X21.9_803.571mz_pos | PubChem:(132837452)    | Sirius match | 230513.5051 | 157576.0511 | 180332.4616 | 3.99E-10    | 3.99E-10    | 0.028736874 | 1.263553411 | 1.322590182 | 0.633985677 | 0.677738211 | 0.935443312 |
| X8.6_298.177mz_pos  | PubChem:(134993681_134 | Sirius match | 2309466.848 | 1373935.859 | 1656148.454 | 0.0000149   | 0.0032865   | 0.996255306 | 0.713183524 | 0.916145172 | 0.577785539 | 0.64417223  | 0.896942637 |
| X28.6_340.284mz_pos | PubChem:(135240006_135 | Sirius match | 46584.80982 | 20353.84644 | 21020.44182 | 3.99E-09    | 0.0000572   | 0.996740346 | 2.463041263 | 4.211162735 | 0.449606593 | 0.423375139 | 1.061957944 |
| X19.5_850.609mz_pos | PubChem:(135563652);CH | Sirius match | 2909637.267 | 2042332.584 | 1800610.724 | 3.99E-10    | 3.99E-10    | 0.101558223 | 0.35234552  | 0.99328743  | 0.651944183 | 0.561649934 | 1.160766064 |
| X20.6_462.142mz_neg | PubChem:(135965356)    | Sirius match | 22532.2032  | 73217.94447 | 80293.51679 | 2.01E-08    | 0.001394891 | 0.735644622 | 4.043220882 | 0.931499222 | 3.211214835 | 3.174717362 | 1.011496291 |
| X14.9_778.55mz_pos  | PubChem:(136390100)    | Sirius match | 169763.1559 | 118458.0041 | 97776.1045  | 3.99E-10    | 3.99E-10    | 0.01984759  | 0.505800513 | 1.125406076 | 0.648786938 | 0.498508915 | 1.301455038 |
| X24_600.468mz_pos   | PubChem:(137308119)    | Sirius match | 242622.0117 | 178744.6027 | 157364.6929 | 4.02E-10    | 4E-10       | 0.00901202  | 0.375104026 | 1.090764418 | 0.686429578 | 0.562553484 | 1.220203231 |
| X10_267.12mz_pos    | PubChem:(139327660)    | Sirius match | 4907.711304 | 8866.309242 | 8775.933682 | 0.00000521  | 0.0000325   | 0.654165854 | 14.65471485 | 13.62413157 | 1.680390573 | 1.52020277  | 1.105375616 |
| X10.3_380.033mz_neg | PubChem:(14128419)     | Sirius match | 107283.878  | 137533.5706 | 23764.35862 | 0.000253003 | 0.004562729 | 2.52E-08    | 5.959660522 | 5.657805345 | 1.316669714 | 0.203912316 | 6.457038697 |
| X10.1_458.332mz_pos | PubChem:(18296198)     | Sirius match | 835886.0436 | 636746.8246 | 613118.006  | 3.99E-10    | 3.99E-10    | 0.072385512 | 1.08201853  | 2.477691834 | 0.68505436  | 0.632213202 | 1.083581232 |
| X5.7_312.238mz_pos  | PubChem:(19141677)     | Sirius match | 202748.6769 | 165695.6322 | 155956.575  | 1.08E-09    | 0.000000074 | 0.364673377 | 1.186831453 | 1.978399774 | 0.76049472  | 0.670621228 | 1.134015281 |
| X8.6_527.214mz_pos  | PubChem:(19529255)     | Sirius match | 40497.96079 | 25859.81557 | 57918.46074 | 0.0000944   | 0.002834918 | 0.88476406  | 5.754228183 | 9.109002892 | 0.635783276 | 1.217705125 | 0.522115957 |
| X16.8_646.473mz_pos | PubChem:(19893390_5432 | Sirius match | 2349454.304 | 1652754.26  | 1569277.126 | 3.99E-10    | 4E-10       | 0.168280981 | 0.478679185 | 1.16915685  | 0.656808155 | 0.612670915 | 1.072040698 |
| X23.8_817.587mz_pos | PubChem:(21059301)     | Sirius match | 118224.1056 | 86919.09782 | 96378.50363 | 3.99E-10    | 3.99E-10    | 0.000174558 | 1.483777261 | 1.226096213 | 0.692083466 | 0.698441683 | 0.990896566 |
| X34.6_533.192mz_pos | PubChem:(21588517)     | Sirius match | 1081864.73  | 4999869.007 | 6709951.779 | 3.99E-10    | 1.14E-09    | 0.95746507  | 3.483479576 | 1.438125088 | 5.290857032 | 6.75962634  |             |
| X22_542.426mz_pos   | PubChem:(21808473_2180 | Sirius match | 304031.1077 | 223695.2076 | 175572.8689 | 4E-10       | 4E-10       | 0.009745675 | 0.705860826 | 1.096623209 | 0.684135919 | 0.501196147 | 1.365006342 |
| X26.6_483.297mz_neg | PubChem:(21845541)     | Sirius match | 44757.70494 | 21910.19053 | 25033.32522 | 3.16E-09    | 6.22E-08    | 0.242078837 | 1.063653632 | 2.353118017 | 0.510801923 | 0.501555994 | 1.018434491 |
| X37.7_444.087mz_pos | PubChem:(22536862)     | Sirius match | 1759790.126 | 2871514.087 | 4338772.811 | 0.000634356 | 0.000359794 | 0.292901182 | 1.36477462  | 1.098813928 | 1.540888793 | 2.310389069 | 0.666939095 |
| X14.9_243.159mz_pos | PubChem:(23052242)     | Sirius match | 10214.65057 | 16354.71521 | 17732.44711 | 0.0000114   | 0.004797536 | 0.995194817 | 1.769539525 | 2.677201362 | 1.548587549 | 1.540061022 | 1.005536492 |
| X32.4_372.116mz_neg | PubChem:(2373052_23730 | Sirius match | 10802.85545 | 16011.81526 | 16770.09244 | 0.002578227 | 0.000280553 | 0.154689262 | 2.612344403 | 2.671422397 | 1.497498293 | 1.312162244 | 1.141244766 |
| X18.8_687.488mz_pos | PubChem:(25155707)     | Sirius match | 114213.1396 | 80232.53605 | 89202.13674 | 3.99E-10    | 3.99E-10    | 0.049256441 | 1.011548692 | 1.083706073 | 0.626239172 | 0.671906597 | 0.986207273 |
| X28.5_370.183mz_pos | PubChem:(25744986)     | Sirius match | 123640.9829 | 845388.6331 | 918903.2965 | 3.99E-10    | 5.99E-10    | 0.980542907 | 4.661612361 | 0.689590766 | 6.350727166 | 6.845692279 | 0.92796985  |
| X27.2_483.367mz_pos | PubChem:(4412448)      | Sirius match | 218625.9811 | 169766.4878 | 146713.2907 | 0.00000178  | 0.00113011  | 0.99818126  | 1.894138785 | 2.218131106 | 0.722581277 | 0.581581082 | 1.242442884 |
| X32.1_352.177mz_pos | PubChem:(53933216)     | Sirius match | 83123.07478 | 131705.0325 | 170757.8045 | 0.0000764   | 0.000803686 | 0.682904217 | 1.385764375 | 2.224735689 | 1.499354797 | 1.750229485 | 0.856661832 |
| X10.2_428.285mz_pos | PubChem:(54054725)     | Sirius match | 20390.9679  | 15945.25709 | 15122.31099 | 0.000000553 | 0.0000137   | 0.503033382 | 0.962731876 | 1.36545453  | 0.787009295 | 0.678919024 | 1.159209372 |
| X10.6_546.385mz_pos | PubChem:(57073523)     | Sirius match | 1018227.933 | 771066.8542 | 740749.5357 | 3.99E-10    | 4.39E-10    | 0.444959934 | 0.395577489 | 1.056750671 | 0.683114303 | 0.640934128 | 1.065810469 |
| X14_329.233mz_neg   | PubChem:(57112208)     | Sirius match | 25705.63432 | 6684.929061 | 9755.626562 | 3.99E-10    | 8.43E-10    | 0.949176203 | 0.915172517 | 2.011020692 | 0.313771452 | 0.366465905 | 0.856209124 |
| X5.6_366.238mz_pos  | PubChem:(57413668)     | Sirius match | 53055.8093  | 16582.99882 | 17773.42171 | 1.53E-08    | 0.00000342  | 0.643950986 | 1.784469595 | 2.631528655 | 0.322117711 | 0.301657888 | 1.067824591 |
| X12.8_645.442mz_pos | PubChem:(57805134_6853 | Sirius match | 170941.0329 | 128590.3956 | 102735.8712 | 4.01E-10    | 3.99E-10    | 0.000290415 | 1.733755498 | 1.733755498 | 0.701547829 | 0.522205571 | 1.343432296 |
| X23.3_644.494mz_pos | PubChem:(57840046)     | Sirius match | 878329.6785 | 635631.8556 | 551021.0717 | 3.99E-10    | 4E-10       | 0.021003944 | 0.422824579 | 0.999950297 | 0.657564134 | 0.536135364 | 1.226489012 |
| X10.2_620.421mz_pos | PubChem:(58301686_1231 | Sirius match | 444288.0443 | 366602.3678 | 342615.7641 | 4.01E-10    | 4.64E-10    | 0.087999292 | 0.627986898 | 0.810189514 | 0.75488242  | 0.661199027 | 1.14168713  |
| X19.9_762.557mz_pos | PubChem:(58302059_1237 | Sirius match | 4537241.301 | 3191260.414 | 2906723.413 | 3.99E-10    | 4.07E-10    | 0.124545442 | 0.319143067 | 1.006824553 | 0.677703264 | 0.605210322 | 1.119781404 |
| X34.6_567.155mz_neg | PubChem:(59648218)     | Sirius match | 24579.50109 | 128142.6604 | 77061.65642 | 3.99E-10    | 4.01E-10    | 0.448035744 | 4.399815946 | 2.257624822 | 5.122976548 | 2.728242219 | 1.877757229 |
| X30.2_676.499mz_pos | PubChem:(59844531)     | Sirius match | 257573.3758 | 431166.957  | 584259.6459 | 0.003244338 | 0.0000291   | 0.032759451 | 4.29272017  | 4.422537108 | 1.565916543 | 1.949717168 | 0.803128124 |
| X20.5_674.504mz_pos | PubChem:(60194116)     | Sirius match | 3991514.188 | 2866604.975 | 2659430.85  | 4E-10       | 4.19E-10    | 0.065125163 | 0.495035034 | 0.964214605 | 0.689013251 | 0.613792708 | 1.122550402 |
| X14.4_574.416mz_pos | PubChem:(67222548)     | Sirius match | 379911.4366 | 279655.6948 | 257354.9943 | 3.99E-10    | 3.99E-10    | 0.005187629 | 0.669256733 | 0.847092633 | 0.683879655 | 0.586249844 | 1.16653274  |
| X12.8_662.468mz_pos | PubChem:(6722172)      | Sirius match | 588688.1039 | 420628.7753 | 369100.8252 | 3.99E-10    | 3.99E-10    | 0.084249945 | 0.455171825 | 0.865661079 | 0.649261348 | 0.541109906 | 1.199871436 |
| X19.4_413.291mz_neg | PubChem:(69516894)     | Sirius match | 89328.43998 | 39979.38992 | 35992.91116 | 0.0000214   | 0.000721922 | 0.802746032 | 0.506521448 | 0.992813821 | 0.458370637 | 0.368460568 | 1.244015443 |
| X16.4_267.124mz_neg | PubChem:(69745087)     | Sirius match | 6322413.316 | 3945043.097 | 4354788.963 | 0.00000181  | 0.001139875 | 0.998161048 | 0.407690009 | 0.742530881 | 0.574057405 | 0.675462017 | 0.849873702 |
| X11.9_648.453mz_pos | PubChem:(70883444)     | Sirius match | 952884.7595 | 716571.159  | 655045.1535 | 3.99E-10    | 3.99E-10    | 0.157504177 | 0.466475752 | 0.926663358 | 0.672694811 | 0.595245031 | 1.130114114 |
| X15_690.498mz_pos   | PubChem:(70986616)     | Sirius match | 26321.68452 | 19005.87882 | 14584.95291 | 2.76E-08    | 0.000000162 | 0.192564109 | 1.248244449 | 2.564889288 | 0.725145402 | 0.516827795 | 1.403069665 |
| X6_574.36mz_pos     | PubChem:(71202655)     | Sirius match | 35719.40111 | 10986.63336 | 11447.89319 | 0.00000157  | 0.0000038   | 0.237923333 | 1.280366636 | 2.098996662 | 0.327068798 | 0.294253103 | 1.111522004 |
| X18.9_938.661mz_pos | PubChem:(71451942);Pub | Sirius match | 85846.70065 | 55714.32703 | 46372.85173 | 3.99E-10    | 3.99E-10    | 0.0000769   | 0.521300619 | 1.253234785 | 0.624463416 | 0.470924117 | 1.326038302 |
| X37.7_381.174mz_neg | PubChem:(85711770)     | Sirius match | 701658.9484 | 1157712.423 | 1254155.265 | 0.000328685 | 0.00000486  | 0.033701486 | 2.629282814 | 2.808916043 | 1.565173047 | 1.621829958 | 0.96506606  |
| X12.8_367.268mz_pos | PubChem:(87315495)     | Sirius match | 31747.12273 | 19660.64861 | 24321.19842 | 4.26E-10    | 7.48E-08    | 0.662774946 | 1.254691378 | 1.738169384 | 0.621114728 | 0.698120012 | 0.889696209 |
| X15.7_544.405mz_pos | PubChem:(8755409)      | Sirius match | 1335104.865 | 974670.9688 | 916298.9265 | 3.99E-10    | 3.99E-10    | 0.19992785  | 0           |             |             |             |             |



|                     |                            |                  |             |             |             |             |             |             |             |             |             |              |             |
|---------------------|----------------------------|------------------|-------------|-------------|-------------|-------------|-------------|-------------|-------------|-------------|-------------|--------------|-------------|
| X11.7_604.426mz_pos | PubChem:(89468623)         | Sirius match     | 930599.003  | 694757.6179 | 633236.8007 | 3.99E-10    | 3.99E-10    | 0.10390075  | 0.318499888 | 1.205512126 | 0.668619183 | 0.586578504  | 1.139863085 |
| X21.2_864.624mz_pos | PubChem:(89625184_1233     | Sirius match     | 2612420.49  | 1742953.916 | 1550340.753 | 3.99E-10    | 3.99E-10    | 0.117369178 | 0.376615055 | 1.187064829 | 0.614291101 | 0.532826293  | 1.15289187  |
| X8.8_400.29mz_pos   | PubChem:(89759680)         | Sirius match     | 872392.7923 | 653450.0145 | 626637.0688 | 3.99E-10    | 3.99E-10    | 0.11944484  | 0.452678756 | 0.943645234 | 0.670672202 | 0.61799864   | 1.085232488 |
| X37.7_665.43mz_neg  | PubChem:(90060284)         | Sirius match     | 57095.79115 | 103017.5781 | 124522.5289 | 0.000082    | 0.000132797 | 0.355604228 | 3.628383661 | 3.597108277 | 1.791565213 | 1.903392103  | 0.941248632 |
| X10.8_590.411mz_pos | PubChem:(90302461)         | Sirius match     | 965271.1687 | 734260.7256 | 701489.9494 | 3.99E-10    | 4.02E-10    | 0.25812342  | 0.481359212 | 0.970067665 | 0.681114357 | 0.636444796  | 1.070186072 |
| X28.5_368.169mz_neg | PubChem:(90345383)         | Sirius match     | 7361.44466  | 56151.50762 | 64281.06564 | 3.99E-10    | 5.55E-10    | 0.861661866 | 0.855743463 | 1.074897225 | 6.845877738 | 6.879007495  | 0.995183934 |
| X24.3_790.588mz_pos | PubChem:(90392164)         | Sirius match     | 1692474.605 | 1225302.284 | 1095064.064 | 3.99E-10    | 3.99E-10    | 0.067364257 | 0.325570492 | 0.879501881 | 0.662323587 | 0.584485876  | 1.133172954 |
| X26.2_398.18mz_neg  | PubChem:(91500978)         | Sirius match     | 25638.91992 | 260634.6615 | 244555.1588 | 3.99E-10    | 2.7E-09     | 0.738584379 | 0.85318627  | 0.844022055 | 9.432190143 | 8.13996588   | 1.158750575 |
| X37.7_429.179mz_neg | PubChem:(9311457_93114     | Sirius match     | 228620.6195 | 338406.0678 | 436375.2171 | 0.000106236 | 0.000052    | 0.213911196 | 1.788641549 | 1.718457227 | 1.477077511 | 1.746457071  | 0.845756552 |
| X23.4_474.306mz_pos | PubChem:(9826925_98702     | Sirius match     | 153838.9604 | 127177.0644 | 85717.57395 | 0.002605525 | 0.000246266 | 0.142854558 | 3.072384289 | 2.324699043 | 0.767629283 | 0.483129561  | 1.588868381 |
| X19.3_476.335mz_pos | Pubesanolide               | exact mass match | 84362.76768 | 67602.39877 | 50743.90887 | 1.21E-09    | 4.28E-10    | 0.005429776 | 0.976309396 | 1.507423935 | 0.773159527 | 0.529479165  | 1.460226536 |
| X18.3_511.027mz_pos | Pyriprrole                 | exact mass match | 13737.81028 | 8943.134499 | 6259.120546 | 1.47E-09    | 0.000000557 | 0.616039363 | 6.403470228 | 9.238287482 | 0.67501756  | 0.44429161   | 1.519311967 |
| X10.1_708.438mz_pos | Quadrigemine A             | exact mass match | 9552.791787 | 6893.056769 | 4897.405983 | 0.00000376  | 0.000572717 | 0.917590445 | 6.895276278 | 6.435875394 | 0.770626026 | 0.508437594  | 1.515674756 |
| X16.3_632.228mz_pos | QYNAD                      | exact mass match | 22558.49921 | 14229.36088 | 7956.79478  | 0.000105887 | 0.000158055 | 0.356284376 | 4.411985299 | 3.110923241 | 0.64624849  | 0.342534351  | 1.886667683 |
| X10.3_193.09mz_neg  | R-3-(Methylthio)-1-hexar   | exact mass match | 89184.79524 | 385707.7225 | 556469.6337 | 9.71E-09    | 0.00000826  | 0.823335122 | 1.169531516 | 1.329505089 | 4.583923842 | 5.940629957  | 0.771622517 |
| X19.5_509.335mz_pos | Reduced Vitamin K          | exact mass match | 263098.4817 | 451882.0414 | 542985.5251 | 0.00027026  | 0.001960685 | 0.70631389  | 1.920238817 | 0.94829873  | 1.584901349 | 1.829204382  | 0.86644301  |
| X7.1_381.076mz_neg  | Resorcinolnaphthalein      | exact mass match | 2760.324506 | 6999.746682 | 8619.120107 | 0.004487095 | 0.00393128  | 0.4784411   | 9.083422492 | 2.294949691 | 2.25779069  | 2.190947676  | 1.030508722 |
| X18.3_739.493mz_pos | Rhodopin β-D-glucoside/    | exact mass match | 17209.80867 | 11396.55376 | 13192.33526 | 5.54E-09    | 0.000000306 | 0.380975812 | 2.699682336 | 2.816294816 | 0.673814486 | 0.710090302  | 0.948913799 |
| X17.9_563.383mz_pos | Rhodoxanthin               | exact mass match | 51497.7915  | 37327.08449 | 35757.84114 | 3.99E-10    | 4.01E-10    | 0.045509294 | 0.390956451 | 0.957144574 | 0.625147976 | 1.134966383  |             |
| X16.4_407.11mz_pos  | Rotenonone                 | exact mass match | 49397.35059 | 32128.46587 | 20444.35307 | 0.0000772   | 0.000280261 | 0.484424088 | 2.281497131 | 1.703773213 | 0.64339408  | 0.379277494  | 1.696367674 |
| X32.1_436.201mz_pos | S32826                     | exact mass match | 17286.5441  | 27956.53122 | 32015.87394 | 0.0000364   | 0.003950706 | 0.981829339 | 2.115741833 | 1.962931489 | 1.568133927 | 1.608779502  | 0.974735149 |
| X32.1_353.142mz_neg | S-Adenosylmethioninamid    | exact mass match | 73891.8733  | 112513.9318 | 99407.71338 | 0.0000547   | 0.003191848 | 0.941965392 | 1.842803946 | 2.042825264 | 1.553303467 | 1.20062034   | 1.293750751 |
| X32.1_395.175mz_pos | Salermide                  | exact mass match | 124520.7442 | 192208.6049 | 247240.4793 | 0.0000561   | 0.004521711 | 0.974558688 | 4.290222012 | 3.109137208 | 1.449213063 | 1.678011189  | 0.863649225 |
| X23.2_733.494mz_pos | Salinomycin                | exact mass match | 56507.96646 | 38744.94919 | 38364.87667 | 4.07E-10    | 4.22E-10    | 0.03461752  | 1.09438418  | 1.457906894 | 0.669465786 | 0.611756845  | 1.094333135 |
| X24.7_493.006mz_pos | Sanguisorbic acid dilacton | exact mass match | 100197.2688 | 78300.36284 | 87243.58303 | 5.92E-10    | 4E-10       | 0.01310211  | 1.438904008 | 1.112641431 | 0.739055433 | 0.754963207  | 0.978929073 |
| X14.7_357.228mz_neg | SB 939                     | exact mass match | 7560.429174 | 21665.389   | 27096.5458  | 6.04E-08    | 0.000367112 | 0.985976629 | 1.585611668 | 0.902434336 | 2.742484993 | 2.906829116  | 0.94346275  |
| X9.1_636.061mz_pos  | Sceptrin                   | exact mass match | 47130.92552 | 32369.42422 | 25015.33415 | 3.99E-10    | 3.99E-10    | 0.0000931   | 2.27640536  | 2.204972862 | 0.680857122 | 0.490515527  | 1.388043976 |
| X9.4_710.106mz_pos  | Selenodiglutathione        | exact mass match | 44916.92375 | 31919.79165 | 11669.76813 | 4.96E-10    | 3.99E-10    | 0.00000145  | 11.04352942 | 7.83414256  | 0.70704474  | 2.429819004  | 2.830227996 |
| X10.9_181.974mz_neg | Se-Methylselenocysteine    | exact mass match | 6415.024645 | 28177.72681 | 19014.5448  | 0.000000128 | 0.00195372  | 0.843952862 | 9.497806457 | 2.760506543 | 3.994383141 | 2.291580044  | 1.670185846 |
| X34.7_366.193mz_pos | Senkirkine                 | exact mass match | 4866.911426 | 8490.734225 | 14690.33393 | 0.000798549 | 0.000583175 | 0.34732956  | 2.102621585 | 4.391953451 | 1.637637474 | 2.40936531   | 6.620828785 |
| X18.9_577.056mz_pos | Sennidin A                 | exact mass match | 9980.047114 | 7529.737909 | 7453.820587 | 0.000641186 | 0.00000728  | 0.031185692 | 2.703316801 | 3.021303333 | 0.793283587 | 0.708254021  | 1.120055183 |
| X16.4_409.081mz_pos | Ser-Phe4Cl-OH              | exact mass match | 135464.6073 | 94462.35193 | 63440.11537 | 0.0000427   | 0.000036    | 0.241941034 | 3.869984673 | 2.369824516 | 0.661914345 | 0.413393013  | 1.601174484 |
| X23.3_458.983mz_pos | Sertaconazole              | exact mass match | 7736.898079 | 4051.381104 | 4772.775048 | 5.83E-08    | 0.000000135 | 0.04296562  | 11.53462505 | 0.616320714 | 0.597767226 | 1.031037981  |             |
| X19.9_484.384mz_pos | SM(d18:0/0:0)              | exact mass match | 458374.0329 | 345677.7568 | 271103.2555 | 4.02E-10    | 3.99E-10    | 0.003226203 | 0.597470523 | 0.942051136 | 0.699076037 | 0.503804992  | 1.387592518 |
| X21.9_487.33mz_pos  | SM(d18:1/0:0)              | exact mass match | 43515.23415 | 31024.03266 | 35695.8681  | 1.66E-09    | 4.16E-10    | 0.003036141 | 3.796982852 | 2.978247594 | 0.704175008 | 0.74387034   | 0.946636759 |
| X15.8_482.001mz_pos | Sodium picosulfate         | exact mass match | 20226.96054 | 14686.88304 | 9668.233166 | 8.68E-10    | 4E-10       | 0.000498523 | 1.375390443 | 2.510239274 | 0.731986682 | 0.452074027  | 1.619174381 |
| X22.1_471.337mz_pos | Solacapine                 | exact mass match | 17342.89997 | 13170.46154 | 8504.491516 | 0.000000233 | 0.00000034  | 0.140018238 | 8.334070062 | 2.583754647 | 0.768956587 | 0.470474448  | 1.634447652 |
| X5.6_635.412mz_pos  | Soyasapogenol B 3-O-D-     | exact mass match | 27471.98114 | 9290.756629 | 7791.322303 | 0.00000679  | 0.000622832 | 0.884188506 | 1.576047678 | 3.216118372 | 0.351611459 | 0.261385055  | 1.34518578  |
| X23.9_607.426mz_pos | Spheroidene                | exact mass match | 27494.59275 | 18827.76376 | 11376.71309 | 2.95E-08    | 0.000000109 | 0.15760614  | 3.053438015 | 4.75885561  | 0.691462407 | 0.395374656  | 1.748878934 |
| X6.9_730.485mz_pos  | Spinetoram                 | exact mass match | 15339.77618 | 5014.971799 | 4639.109405 | 0.000360748 | 0.0000119   | 0.057017969 | 10.78028178 | 5.050721924 | 0.357651695 | 0.284805604  | 1.255774779 |
| X24.5_512.018mz_pos | Sporidesmin                | exact mass match | 39258.69197 | 31415.23807 | 31866.9266  | 3.28E-08    | 3.94E-09    | 0.023557182 | 0.728264808 | 1.572294885 | 0.789965216 | 0.738718482  | 1.069372482 |
| X15.6_639.431mz_pos | Sporidesmolide I           | exact mass match | 13382.84704 | 9911.290077 | 7397.610028 | 0.00000078  | 4E-10       | 0.00000925  | 1.270929189 | 1.798701715 | 0.529050048 | 1.434561669  |             |
| X17.4_500.011mz_pos | SR 1001                    | exact mass match | 26027.75111 | 19423.66546 | 15506.84899 | 1.1E-09     | 4.28E-10    | 0.005843241 | 1.429930702 | 2.073639024 | 0.747189417 | 0.551935182  | 1.353762979 |
| X16.4_384.051mz_neg | S-Sulfanylgutathione       | exact mass match | 54977.74823 | 37001.22184 | 14278.55337 | 0.000146975 | 0.000123704 | 0.2903673   | 4.04833189  | 4.718707479 | 0.713610753 | 0.224822376  | 2.914810177 |
| X7_841.554mz_pos    | Staphyloxanthin            | exact mass match | 41736.71981 | 13771.35166 | 9793.893436 | 4.02E-10    | 3.48E-08    | 0.762789627 | 1.534558369 | 3.300683462 | 0.351976572 | 0.225188023  | 1.56303416  |
| X25.9_517.695mz_pos | Stearoyl-CoA               | exact mass match | 19799.35427 | 14826.03427 | 14352.22565 | 0.000000139 | 6.56E-09    | 0.017075683 | 0.830608288 | 1.140070487 | 0.753805579 | 0.67165758   | 1.122306368 |
| X12_458.332mz_pos   | Suillin                    | exact mass match | 53270.58942 | 39324.89876 | 35399.17952 | 3.99E-10    | 4.05E-10    | 0.059184149 | 0.763716884 | 0.74552358  | 0.719307027 | 0.5992016932 | 1.20041172  |
| X10.9_789.159mz_pos | Sultamicillin tosilate     | exact mass match | 58457.21846 | 40105.29252 | 15781.27941 | 3.99E-10    | 3.99E-10    | 0.00000162  | 13.20668958 | 8.978655891 | 0.670999084 | 0.255800736  | 2.623131952 |
| X25.4_504.022mz_pos | T0901317                   | exact mass match | 70259.57045 | 57090.89452 | 47613.89963 | 1.29E-09    | 3.99E-10    | 0.00000831  | 0.309518342 | 1.52194311  | 0.779976515 | 0.594902804  | 1.311099074 |
| X17.1_638.099mz_pos | Tannin                     | exact mass match | 23049.98616 | 17296.25919 | 12703.29015 | 0.000000053 | 3.26E-09    | 0.016730222 | 3.058643472 | 3.51896552  | 0.754581732 | 0.494671929  | 1.525418538 |
| X15.8_466.991mz_pos | TEMEFOS                    | exact mass match | 12467.15807 | 8680.897133 | 7675.373888 | 1.03E-08    | 0.00000598  | 0.771109753 | 1.030770344 | 1.116848891 | 0.725264    | 0.587462435  | 1.234570853 |
| X7.9_340.269mz_pos  | Templetine                 | exact mass match | 52127.49582 | 35004.88161 | 28247.80694 | 3.99E-10    | 3.99E-10    | 0.001470864 | 0.721431129 | 1.654409717 | 0.661066486 | 0.49714579   | 1.329723593 |
| X34.7_367.158mz_pos | Testosterone sulfate       | exact mass match | 2637.576261 | 4615.463923 | 5954.178406 | 0.002207843 | 0.000111722 | 0.096294002 | 3.60429187  | 5.772699904 | 1.624321785 | 1.567353995  | 1.036346473 |
| X28.8_562.733mz_pos | Tetrabromobisphenol A      | exact mass match | 11043.02437 | 6789.939148 | 3278.259208 | 0.00000222  | 0.0000019   | 0.15418324  | 3.622989582 | 8.533021763 | 0.663926345 | 0.311938382  | 2.128389399 |
| X16.5_489.663mz_pos | Tetradecanoyl-CoA          | exact mass match | 11561.438   | 8304.402468 | 9589.602232 | 5.89E-09    | 6E-10       | 0.008232401 | 1.588981934 | 1.840702098 | 0.747978751 | 0.771578815  | 0.969413282 |
| X17.2_615.337mz_pos | TETRAHYDROAMBOGIC          | exact mass match | 7737.808921 | 11365.07809 | 12022.26045 | 0.001708827 | 0.001424036 | 0.410135519 | 0.930154491 | 2.821322659 | 1.427132989 | 1.358589661  | 1.050451825 |
| X17.7_462.826mz_pos | Thelepin                   | exact mass match | 449427.2003 | 328901.4837 | 312842.9442 | 3.99E-10    | 3.99E-10    | 0.003886396 | 0.812911522 | 0.818374048 | 0.674357945 | 0.598127661  | 1.127448    |

|                     |                                                                 |                  |             |             |             |             |             |             |             |             |             |             |             |
|---------------------|-----------------------------------------------------------------|------------------|-------------|-------------|-------------|-------------|-------------|-------------|-------------|-------------|-------------|-------------|-------------|
| X18.3_505.016mz_pos | Thiamin triphosphate                                            | exact mass match | 19577.83305 | 14986.75223 | 10442.47431 | 6.16E-09    | 0.000000593 | 0.463748967 | 2.428097432 | 3.676806702 | 0.770395444 | 0.503235277 | 1.530885212 |
| X16.5_543.871mz_pos | Thiifuzamide                                                    | exact mass match | 17758.25144 | 13096.86374 | 12549.98326 | 5.69E-10    | 8.53E-10    | 0.05630675  | 0.612996838 | 1.437615962 | 0.745383497 | 0.653255952 | 1.141028252 |
| X16.4_357.093mz_neg | Thr-Ala-OH                                                      | exact mass match | 13287.64488 | 8511.731576 | 6750.008233 | 0.001071282 | 0.0000147   | 0.037919365 | 2.254454515 | 2.476714927 | 0.720101941 | 0.485500087 | 1.483216913 |
| X16.4_405.087mz_pos | Thr-Phe4Cl-OH                                                   | exact mass match | 9786.344556 | 6527.231598 | 5399.736756 | 0.000762983 | 0.00000255  | 0.013699784 | 3.982061135 | 2.188639801 | 0.72677182  | 0.532720527 | 1.364264719 |
| X23.1_500.019mz_pos | Thymidine 5'-triphosphate                                       | exact mass match | 46006.51556 | 35430.5105  | 27797.82176 | 5.77E-09    | 4.04E-10    | 0.000587365 | 0.630963173 | 1.488410389 | 0.760923691 | 0.556289066 | 1.367856637 |
| X7.4_459.182mz_neg  | Tovophyllin B                                                   | exact mass match | 3539.468929 | 6882.12645  | 1951.542004 | 0.001102515 | 0.000438255 | 0.273099638 | 11.05618329 | 11.05195536 | 1.818526222 | 0.564935866 | 3.218995877 |
| X17.2_550.047mz_pos | trans-Zeatin riboside diphosphate                               | exact mass match | 65689.67859 | 52908.06958 | 46839.48019 | 0.000000182 | 6.54E-10    | 0.00170475  | 0.621024215 | 1.437514077 | 0.776062987 | 0.626815663 | 1.238104011 |
| X15_515.178mz_pos   | Triamcinolone acetonide sodium salt                             | exact mass match | 4566.903007 | 6587.692234 | 3827.031959 | 0.000105096 | 0.000000909 | 0.019819705 | 9.706514864 | 9.986612351 | 1.373503383 | 0.775660988 | 1.770752176 |
| X14.9_303.18mz_pos  | Tributyrin                                                      | exact mass match | 48789.92481 | 90392.83316 | 78489.58964 | 0.00000287  | 0.0000631   | 0.587077612 | 2.117933821 | 1.647874084 | 1.737335249 | 1.407857784 | 1.23402752  |
| X21.9_480.004mz_pos | Tricetin 7,3'-disulfate                                         | exact mass match | 94049.97948 | 75379.35423 | 63622.86133 | 6.55E-10    | 4.01E-10    | 0.001433101 | 0.388707571 | 1.080873705 | 0.767083398 | 0.591401502 | 1.29706028  |
| X19.3_539.039mz_pos | Trisjuglone                                                     | exact mass match | 7835.578654 | 5578.132449 | 4700.493817 | 0.0000938   | 2.89E-08    | 0.001704799 | 1.625720987 | 4.631124142 | 0.778823526 | 0.591945184 | 1.315702107 |
| X13.8_522.131mz_pos | Troglitazone sulfate                                            | exact mass match | 37953.90696 | 49005.20836 | 21586.31772 | 0.000285288 | 0.00331017  | 0.801610139 | 4.660366857 | 3.745237808 | 1.239462464 | 0.522288659 | 2.373136851 |
| X15.7_634.463mz_pos | Tsugarioside B                                                  | exact mass match | 9181.786004 | 4539.844642 | 3512.967423 | 3.99E-10    | 3.99E-10    | 0.052662847 | 1.018691936 | 7.613841132 | 0.576838829 | 0.39290263  | 1.468147028 |
| X17.4_518.346mz_pos | Tuftsins                                                        | exact mass match | 96695.78983 | 74037.07824 | 81597.95368 | 4.13E-10    | 4.01E-10    | 0.005199108 | 0.925592141 | 3.04321616  | 0.724576022 | 0.731474939 | 0.990568485 |
| X12.9_384.295mz_pos | UCM707                                                          | exact mass match | 101724.5225 | 70662.72943 | 64551.96549 | 3.99E-10    | 3.99E-10    | 0.024628102 | 0.590054719 | 0.606922022 | 0.6649264   | 0.554034002 | 1.200154499 |
| X18.6_645.091mz_pos | UDP-2,3-diacetamido-2,3-diphosphate                             | exact mass match | 5893.800709 | 4128.877845 | 4972.302104 | 0.000226516 | 0.000019    | 0.093158276 | 3.912040244 | 5.624036322 | 0.798009563 | 0.79209746  | 1.007463858 |
| X34.6_631.104mz_neg | UDP-2,4-bis(acetamido)-2,4-diphosphate                          | exact mass match | 7550.658811 | 48719.31811 | 29512.62121 | 7.07E-10    | 7.53E-10    | 0.039315529 | 11.4865541  | 3.460443031 | 5.984518349 | 3.196193925 | 1.872389001 |
| X18_613.086mz_pos   | UDP-2-acetamido-4-aminopyrimidin-5(2H)-one                      | exact mass match | 18958.84556 | 14608.03664 | 9079.181458 | 0.00000303  | 0.0000147   | 0.350431279 | 2.333404374 | 4.714779559 | 0.77740783  | 0.459005349 | 1.693679238 |
| X20.7_549.052mz_pos | UDP-4-dehydro-6-deoxyuridine                                    | exact mass match | 7570.34339  | 5259.286014 | 3408.66604  | 0.00000218  | 4.27E-10    | 0.0000662   | 4.897163925 | 11.04803731 | 0.770805798 | 0.459594583 | 1.677142913 |
| X27.8_528.042mz_pos | UDP-L-Ara4FN                                                    | exact mass match | 73272.33443 | 55793.62718 | 41747.83562 | 4.36E-10    | 3.99E-10    | 0.000515946 | 0.723929638 | 1.568182847 | 0.73213004  | 0.505368778 | 1.448704532 |
| X18.1_558.043mz_pos | UDP-L-Ara4N                                                     | exact mass match | 16547.76361 | 12036.34252 | 10991.10076 | 0.000000948 | 0.0000822   | 0.749756788 | 2.02726663  | 1.721258501 | 0.737812978 | 0.623246807 | 1.183821513 |
| X17.3_535.037mz_pos | UDP-L-Ara4O                                                     | exact mass match | 79896.13972 | 62469.9675  | 55382.63279 | 6.06E-10    | 5.33E-09    | 0.170170715 | 0.793722664 | 1.045990995 | 0.749884192 | 0.606004967 | 1.237422517 |
| X9.9_678.091mz_pos  | UDP-N-acetyl-3-(1-carboxyethyl)-5-phosphate                     | exact mass match | 67048.35342 | 42725.82134 | 18218.69267 | 4.56E-10    | 4E-10       | 0.001360989 | 8.487262409 | 7.339622028 | 0.628240915 | 0.257673264 | 2.438130001 |
| X9_888.082mz_pos    | UDP-N-acetyl-6-(D-galactosyl)-5-phosphate                       | exact mass match | 20177.8202  | 10988.41429 | 1656.054656 | 1.03E-08    | 1.84E-08    | 0.092849021 | 12.33119574 | 13.01423077 | 0.566202371 | 0.094945685 | 5.963434459 |
| X13.2_516.374mz_pos | UNC0321                                                         | exact mass match | 200292.9458 | 147786.3797 | 140343.0499 | 3.99E-10    | 4E-10       | 0.088039577 | 0.781406145 | 0.982601703 | 0.684824418 | 0.610442469 | 1.121849237 |
| X22.8_671.492mz_pos | Uvaricin                                                        | exact mass match | 281906.4428 | 184568.9007 | 229241.4642 | 4.04E-09    | 6.6E-09     | 0.07567074  | 2.843286323 | 3.466167205 | 0.619629953 | 0.702173029 | 0.882446245 |
| X17.1_582.388mz_pos | Valnemulin                                                      | exact mass match | 9613.572866 | 7188.79071  | 7243.693649 | 0.0000268   | 0.000016    | 0.191348769 | 2.132630309 | 4.378916301 | 0.788773781 | 0.714057199 | 1.10463669  |
| X11.6_590.41mz_pos  | Vitamin D2 glucosiduronic acid                                  | exact mass match | 10312.80548 | 7853.227597 | 6383.621301 | 0.00000618  | 0.0000128   | 0.27194542  | 1.468195322 | 2.540858922 | 0.79349504  | 0.595786122 | 1.331845457 |
| X15.9_614.08mz_pos  | XCT 790                                                         | exact mass match | 5673.370621 | 3756.460274 | 2649.669852 | 0.000805555 | 0.000116426 | 0.153652748 | 4.286073295 | 12.00670279 | 0.765542031 | 0.470488783 | 1.627120687 |
| X29.1_553.065mz_pos | Xipamide O-glucuronide                                          | exact mass match | 37023.20353 | 28049.15397 | 15202.91056 | 9.93E-09    | 4E-10       | 0.0000783   | 1.73218069  | 2.833712935 | 0.755544939 | 0.38793258  | 1.947619196 |
| X23.3_507.012mz_pos | Yellow prussiate of soda                                        | exact mass match | 41352.90536 | 31489.55507 | 33365.96584 | 1.59E-08    | 4.29E-10    | 0.001285266 | 3.751984924 | 6.240874171 | 0.752036476 | 0.732634877 | 1.026481949 |
| X12.2_301.164mz_pos | Zinndiol: 1-[4,5-Bis(hydroxymethyl)-2-thiazolyl]ethane-2-thione | exact mass match | 10962.51287 | 24032.3679  | 23862.77232 | 0.000000207 | 0.001015384 | 0.961064658 | 1.536081427 | 1.787099151 | 2.064818921 | 1.91052472  | 1.080760118 |
| X16.4_251.127mz_pos | δ-CEHC                                                          | exact mass match | 3097794.175 | 2110034.384 | 2080346.226 | 0.0000208   | 0.001228308 | 0.88933765  | 0.739980866 | 0.860171842 | 0.61814365  | 0.646771506 | 0.955737295 |
