# Supplementary material for: Integrated analysis of the faecal metagenome and serum metabolome reveals the role of gut microbiome-associated metabolites in the detection of colorectal cancer and adenoma
Source: PubMed Central journal article supplement — Gut. 2021 Aug 30;71(7):1315–25. doi: 10.1136/gutjnl-2020-323476 (PMC9185821; doi:10.1136/gutjnl-2020-323476), 2021-08-30
Supplement: gutjnl-2020-323476supp007.pdf [file gutjnl-2020-323476supp007.pdf]

Table with columns for taxonomic classification (e.g., Enterococcus, Streptococcus, Lactobacillus) and a list of numerical values representing sequence identifiers or counts.



Table with 100 columns of numerical data, likely representing a large dataset or statistical analysis. The data is organized in a grid format with multiple rows and columns of values.



Table with 100 columns and 1000 rows of numerical data. The first row contains column headers (X23.1, X23.2, etc.) and the subsequent rows contain numerical values for each column.





Table with 10 columns of numerical data, likely representing gene expression levels or similar metrics across various samples. The data is organized in a grid format with 10 columns and approximately 1000 rows.



Table with columns for X171\_50010mm\_pos, X21\_50010mm\_pos, X16\_2\_5010mm\_pos, X26\_50402mm\_pos, X10\_50240mm\_pos, X21\_50602mm\_pos, X21\_50602mm\_pos, X24\_50402mm\_pos, X24\_50402mm\_pos, X18\_50510mm\_pos, X21\_50520mm\_pos, X26\_50602mm\_pos, X26\_50602mm\_pos, X26\_50602mm\_pos, X18\_51035mm\_pos, X15\_51035mm\_pos, X15\_51035mm\_pos, X15\_51035mm\_pos, X24\_51202mm\_pos, X21\_51236mm\_pos, X14\_51363mm\_pos, X22\_51402mm\_pos, X26\_51470mm\_pos, X21\_51501mm\_pos, X16\_51501mm\_pos, X26\_51602mm\_pos, X22\_51620mm\_pos, X15\_51780mm\_pos, X24\_51889mm\_pos. The table contains a dense grid of numerical values representing correlations or statistical data points across these various categories.

|           |           |           |           |           |           |           |           |           |           |            |           |           |            |           |           |           |           |           |           |           |           |           |           |           |
|-----------|-----------|-----------|-----------|-----------|-----------|-----------|-----------|-----------|-----------|------------|-----------|-----------|------------|-----------|-----------|-----------|-----------|-----------|-----------|-----------|-----------|-----------|-----------|-----------|
| 0.0173903 | 0.0391882 | 0.0753829 | 0.1371867 | 0.0348248 | 0.2687908 | 0.1081743 | 0.0456327 | 0.0684527 | 0.1210732 | -0.0006469 | 0.0422844 | 0.0094973 | -0.1039125 | 0.1712085 | 0.1698588 | 0.1146015 | 0.1678216 | 0.3861006 | 0.0619358 | 0.1001038 | 0.1082267 | 0.0981296 | 0.0314721 |           |
| 0.0218796 | 0.0470983 | 0.0916784 | 0.1481789 | 0.0486256 | 0.2416739 | 0.0874753 | 0.1133824 | 0.0420479 | 0.2326412 | 0.0486259  | 0.1171824 | 0.0486259 | -0.1171824 | 0.1600664 | 0.1482474 | 0.1320909 | 0.1482474 | 0.3861006 | 0.0619358 | 0.1001038 | 0.1082267 | 0.0981296 | 0.0314721 |           |
| 0.2809678 | 0.5626772 | 0.9282973 | 1.616312  | 0.1775492 | 0.5480725 | 0.4811821 | 0.4786665 | 0.2535748 | 0.2007337 | 0.1428487  | 0.1072045 | 0.2803387 | -0.1545811 | 0.1644888 | 0.1564578 | 0.2709009 | 0.2709009 | 0.5481193 | 0.3783898 | 0.3865917 | 0.3193828 | 0.2229257 | 0.5724245 | 0.9341226 |
| 0.177761  | 0.4180047 | 0.6206296 | 0.9382847 | 0.1806257 | 0.7043987 | 0.5804458 | 0.6040484 | 0.4491741 | 0.3184801 | 0.4747034  | 0.3184801 | 0.4747034 | -0.3184801 | 0.3184801 | 0.3184801 | 0.3184801 | 0.3184801 | 0.6206296 | 0.4180047 | 0.6206296 | 0.9382847 | 0.1806257 | 0.7043987 |           |
| 0.0321344 | 0.0321344 | 0.0321344 | 0.0321344 | 0.0321344 | 0.0321344 | 0.0321344 | 0.0321344 | 0.0321344 | 0.0321344 | 0.0321344  | 0.0321344 | 0.0321344 | 0.0321344  | 0.0321344 | 0.0321344 | 0.0321344 | 0.0321344 | 0.0321344 | 0.0321344 | 0.0321344 | 0.0321344 | 0.0321344 | 0.0321344 |           |
| 0.5466740 | 0.4380073 | 0.3918894 | 0.3819858 | 0.0465297 | 0.3863363 | 0.1117345 | 0.0917843 | 0.0520255 | 0.0414004 | 0.0483775  | 0.1017914 | 0.1952755 | -0.4200963 | 0.4077163 | 0.4780749 | 0.5122028 | 0.4167314 | 0.1512652 | 0.0718878 | 0.2620274 | 0.4400923 | 0.4247418 | 0.4781831 | 0.4383378 |
| 0.0321344 | 0.0321344 | 0.0321344 | 0.0321344 | 0.0321344 | 0.0321344 | 0.0321344 | 0.0321344 | 0.0321344 | 0.0321344 | 0.0321344  | 0.0321344 | 0.0321344 | 0.0321344  | 0.0321344 | 0.0321344 | 0.0321344 | 0.0321344 | 0.0321344 | 0.0321344 | 0.0321344 | 0.0321344 | 0.0321344 | 0.0321344 |           |
| 0.5274292 | 0.3664275 | 0.2816275 | 0.2816275 | 0.0321344 | 0.3664275 | 0.2816275 | 0.2816275 | 0.0321344 | 0.3664275 | 0.2816275  | 0.2816275 | 0.0321344 | 0.3664275  | 0.2816275 | 0.2816275 | 0.0321344 | 0.3664275 | 0.2816275 | 0.2816275 | 0.0321344 | 0.3664275 | 0.2816275 | 0.2816275 |           |
| 0.2827206 | 0.0591285 | 0.0591285 | 0.0591285 | 0.0591285 | 0.0591285 | 0.0591285 | 0.0591285 | 0.0591285 | 0.0591285 | 0.0591285  | 0.0591285 | 0.0591285 | 0.0591285  | 0.0591285 | 0.0591285 | 0.0591285 | 0.0591285 | 0.0591285 | 0.0591285 | 0.0591285 | 0.0591285 | 0.0591285 | 0.0591285 |           |
| 0.4561065 | 0.3866377 | 0.2817887 | 0.2817887 | 0.0321344 | 0.3866377 | 0.2817887 | 0.2817887 | 0.0321344 | 0.3866377 | 0.2817887  | 0.2817887 | 0.0321344 | 0.3866377  | 0.2817887 | 0.2817887 | 0.0321344 | 0.3866377 | 0.2817887 | 0.2817887 | 0.0321344 | 0.3866377 | 0.2817887 | 0.2817887 |           |
| 0.4525804 | 0.3819355 | 0.2817887 | 0.2817887 | 0.0321344 | 0.3819355 | 0.2817887 | 0.2817887 | 0.0321344 | 0.3819355 | 0.2817887  | 0.2817887 | 0.0321344 | 0.3819355  | 0.2817887 | 0.2817887 | 0.0321344 | 0.3819355 | 0.2817887 | 0.2817887 | 0.0321344 | 0.3819355 | 0.2817887 | 0.2817887 |           |
| 0.3786517 | 0.3042666 | 0.2178872 | 0.2178872 | 0.0321344 | 0.3042666 | 0.2178872 | 0.2178872 | 0.0321344 | 0.3042666 | 0.2178872  | 0.2178872 | 0.0321344 | 0.3042666  | 0.2178872 | 0.2178872 | 0.0321344 | 0.3042666 | 0.2178872 | 0.2178872 | 0.0321344 | 0.3042666 | 0.2178872 | 0.2178872 |           |
| 0.4262231 | 0.3588365 | 0.2841154 | 0.2841154 | 0.0321344 | 0.3588365 | 0.2841154 | 0.2841154 | 0.0321344 | 0.3588365 | 0.2841154  | 0.2841154 | 0.0321344 | 0.3588365  | 0.2841154 | 0.2841154 | 0.0321344 | 0.3588365 | 0.2841154 | 0.2841154 | 0.0321344 | 0.3588365 | 0.2841154 | 0.2841154 |           |
| 0.4971379 | 0.4100105 | 0.3184801 | 0.3184801 | 0.0321344 | 0.4100105 | 0.3184801 | 0.3184801 | 0.0321344 | 0.4100105 | 0.3184801  | 0.3184801 | 0.0321344 | 0.4100105  | 0.3184801 | 0.3184801 | 0.0321344 | 0.4100105 | 0.3184801 | 0.3184801 | 0.0321344 | 0.4100105 | 0.3184801 | 0.3184801 |           |
| 0.3704161 | 0.3184801 | 0.2619951 | 0.2619951 | 0.0321344 | 0.3184801 | 0.2619951 | 0.2619951 | 0.0321344 | 0.3184801 | 0.2619951  | 0.2619951 | 0.0321344 | 0.3184801  | 0.2619951 | 0.2619951 | 0.0321344 | 0.3184801 | 0.2619951 | 0.2619951 | 0.0321344 | 0.3184801 | 0.2619951 | 0.2619951 |           |
| 0.3342706 | 0.4187311 | 0.4308724 | 0.4308724 | 0.0321344 | 0.4187311 | 0.4308724 | 0.4308724 | 0.0321344 | 0.4187311 | 0.4308724  | 0.4308724 | 0.0321344 | 0.4187311  | 0.4308724 | 0.4308724 | 0.0321344 | 0.4187311 | 0.4308724 | 0.4308724 | 0.0321344 | 0.4187311 | 0.4308724 | 0.4308724 |           |
| 0.5312564 | 0.4142633 | 0.4095631 | 0.4095631 | 0.0321344 | 0.5312564 | 0.4142633 | 0.4095631 | 0.0321344 | 0.5312564 | 0.4142633  | 0.4095631 | 0.0321344 | 0.5312564  | 0.4142633 | 0.4095631 | 0.0321344 | 0.5312564 | 0.4142633 | 0.4095631 | 0.0321344 | 0.5312564 | 0.4142633 | 0.4095631 |           |
| 0.4048571 | 0.4142633 | 0.3985837 | 0.3985837 | 0.0321344 | 0.4048571 | 0.4142633 | 0.3985837 | 0.0321344 | 0.4048571 | 0.4142633  | 0.3985837 | 0.0321344 | 0.4048571  | 0.4142633 | 0.3985837 | 0.0321344 | 0.4048571 | 0.4142633 | 0.3985837 | 0.0321344 | 0.4048571 | 0.4142633 | 0.3985837 |           |
| 0.1979531 | 0.1979531 | 0.1979531 | 0.1979531 | 0.1979531 | 0.1979531 | 0.1979531 | 0.1979531 | 0.1979531 | 0.1979531 | 0.1979531  | 0.1979531 | 0.1979531 | 0.1979531  | 0.1979531 | 0.1979531 | 0.1979531 | 0.1979531 | 0.1979531 | 0.1979531 | 0.1979531 | 0.1979531 | 0.1979531 | 0.1979531 |           |
| 0.3148585 | 0.2754184 | 0.2517771 | 0.2517771 | 0.0321344 | 0.3148585 | 0.2754184 | 0.2517771 | 0.0321344 | 0.3148585 | 0.2754184  | 0.2517771 | 0.0321344 | 0.3148585  | 0.2754184 | 0.2517771 | 0.0321344 | 0.3148585 | 0.2754184 | 0.2517771 | 0.0321344 | 0.3148585 | 0.2754184 | 0.2517771 |           |
| 0.4714109 | 0.4713822 | 0.4713910 | 0.4713910 | 0.0321344 | 0.4714109 | 0.4713822 | 0.4713910 | 0.0321344 | 0.4714109 | 0.4713822  | 0.4713910 | 0.0321344 | 0.4714109  | 0.4713822 | 0.4713910 | 0.0321344 | 0.4714109 | 0.4713822 | 0.4713910 | 0.0321344 | 0.4714109 | 0.4713822 | 0.4713910 |           |
| 0.0742671 | 0.0477163 | 0.0777635 | 0.0777635 | 0.0321344 | 0.0742671 | 0.0477163 | 0.0777635 | 0.0321344 | 0.0742671 | 0.0477163  | 0.0777635 | 0.0321344 | 0.0742671  | 0.0477163 | 0.0777635 | 0.0321344 | 0.0742671 | 0.0477163 | 0.0777635 | 0.0321344 | 0.0742671 | 0.0477163 | 0.0777635 |           |
| 0.2669547 | 0.4081702 | 0.4081972 | 0.4081972 | 0.0321344 | 0.2669547 | 0.4081702 | 0.4081972 | 0.0321344 | 0.2669547 | 0.4081702  | 0.4081972 | 0.0321344 | 0.2669547  | 0.4081702 | 0.4081972 | 0.0321344 | 0.2669547 | 0.4081702 | 0.4081972 | 0.0321344 | 0.2669547 | 0.4081702 | 0.4081972 |           |
| 0.1295408 | 0.1227769 | 0.0989116 | 0.0989116 | 0.0321344 | 0.1295408 | 0.1227769 | 0.0989116 | 0.0321344 | 0.1295408 | 0.1227769  | 0.0989116 | 0.0321344 | 0.1295408  | 0.1227769 | 0.0989116 | 0.0321344 | 0.1295408 | 0.1227769 | 0.0989116 | 0.0321344 | 0.1295408 | 0.1227769 | 0.0989116 |           |
| 0.0903395 | 0.1202265 | 0.1028526 | 0.1028526 | 0.0321344 | 0.0903395 | 0.1202265 | 0.1028526 | 0.0321344 | 0.0903395 | 0.1202265  | 0.1028526 | 0.0321344 | 0.0903395  | 0.1202265 | 0.1028526 | 0.0321344 | 0.0903395 | 0.1202265 | 0.1028526 | 0.0321344 | 0.0903395 | 0.1202265 | 0.1028526 |           |
| 0.1020211 | 0.2977409 | 0.4632067 | 0.4632067 | 0.0321344 | 0.1020211 | 0.2977409 | 0.4632067 | 0.0321344 | 0.1020211 | 0.2977409  | 0.4632067 | 0.0321344 | 0.1020211  | 0.2977409 | 0.4632067 | 0.0321344 | 0.1020211 | 0.2977409 | 0.4632067 | 0.0321344 | 0.1020211 | 0.2977409 | 0.4632067 |           |
| 0.4632067 | 0.4632067 | 0.4632067 | 0.4632067 | 0.4632067 | 0.4632067 | 0.4632067 | 0.4632067 | 0.4632067 | 0.4632067 | 0.4632067  | 0.4632067 | 0.4632067 | 0.4632067  | 0.4632067 | 0.4632067 | 0.4632067 | 0.4632067 | 0.4632067 | 0.4632067 | 0.4632067 | 0.4632067 | 0.4632067 | 0.4632067 |           |
| 0.0317913 | 0.0740139 | 0.0740139 | 0.0740139 | 0.0740139 | 0.0740139 | 0.0740139 | 0.0740139 | 0.0740139 | 0.0740139 | 0.0740139  | 0.0740139 | 0.0740139 | 0.0740139  | 0.0740139 | 0.0740139 | 0.0740139 | 0.0740139 | 0.0740139 | 0.0740139 | 0.0740139 | 0.0740139 | 0.0740139 | 0.0740139 |           |
| 0.1584643 | 0.4015724 | 0.3078624 | 0.3078624 | 0.0321344 | 0.1584643 | 0.4015724 | 0.3078624 | 0.0321344 | 0.1584643 | 0.4015724  | 0.3078624 | 0.0321344 | 0.1584643  | 0.4015724 | 0.3078624 | 0.0321344 | 0.1584643 | 0.4015724 | 0.3078624 | 0.0321344 | 0.1584643 | 0.4015724 | 0.3078624 |           |
| 0.0380928 | 0.5115964 | 0.3482601 | 0.3482601 | 0.0321344 | 0.0380928 | 0.5115964 | 0.3482601 | 0.0321344 | 0.0380928 | 0.5115964  | 0.3482601 | 0.0321344 | 0.0380928  | 0.5115964 | 0.3482601 | 0.0321344 | 0.0380928 | 0.5115964 | 0.3482601 | 0.0321344 | 0.0380928 | 0.5115964 | 0.3482601 |           |
| 0.1077624 | 0.0730527 | 0.0620428 | 0.0620428 | 0.0321344 | 0.1077624 | 0.0730527 | 0.0620428 | 0.0321344 | 0.1077624 | 0.0730527  | 0.0620428 | 0.0321344 | 0.1077624  | 0.0730527 | 0.0620428 | 0.0321344 | 0.1077624 | 0.0730527 | 0.0620428 | 0.0321344 | 0.1077624 | 0.0730527 | 0.0620428 |           |
| 0.0417729 | 0.2634866 | 0.2634866 | 0.2634866 | 0.2634866 | 0.2634866 | 0.2634866 | 0.2634866 | 0.2634866 | 0.2634866 | 0.2634866  | 0.2634866 | 0.2634866 | 0.2634866  | 0.2634866 | 0.2634866 | 0.2634866 | 0.2634866 | 0.2634866 | 0.2634866 | 0.2634866 | 0.2634866 | 0.2634866 | 0.2634866 |           |
| 0.0421763 | 0.2016348 | 0.1953029 | 0.1953029 | 0.0321344 | 0.0421763 | 0.2016348 | 0.1953029 | 0.0321344 | 0.0421763 | 0.2016348  | 0.1953029 | 0.0321344 | 0.0421763  | 0.2016348 | 0.1953029 | 0.0321344 | 0.0421763 | 0.2016348 | 0.1953029 | 0.0321344 | 0.0421763 | 0.2016348 | 0.1953029 |           |
| 0.2048048 | 0.3539234 | 0.1610027 | 0.1610027 | 0.0321344 | 0.2048048 | 0.3539234 | 0.1610027 | 0.0321344 | 0.2048048 | 0.3539234  | 0.1610027 | 0.0321344 | 0.2048048  | 0.3539234 | 0.1610027 | 0.0321344 | 0.2048048 | 0.3539234 | 0.1610027 | 0.0321344 | 0.2048048 | 0.3539234 | 0.1610027 |           |
| 0.0326316 | 0.0937751 | 0.0937751 | 0.0937751 | 0.0937751 | 0.0937751 | 0.0937751 | 0.0937751 | 0.0937751 | 0.0937751 | 0.0937751  | 0.0937751 | 0.0937751 | 0.0937751  | 0.0937751 | 0.0937751 | 0.0937751 | 0.0937751 | 0.0937751 | 0.0937751 | 0.0937751 | 0.0937751 | 0.0937751 | 0.0937751 |           |
| 0.4502023 | 0.5465454 | 0.4740192 | 0.4740192 | 0.0321344 | 0.4502023 | 0.5465454 | 0.4740192 | 0.0321344 | 0.4502023 | 0          |           |           |            |           |           |           |           |           |           |           |           |           |           |           |



Table with 10 columns of numerical data, likely representing a large dataset or statistical analysis. The data is organized in a grid format with rows and columns of values.





Table with 100 columns of numerical data, likely representing a correlation matrix or a list of values for different variables. The values are small, ranging from approximately -0.0000000000000000 to 0.0000000000000000.



Table with 10 columns of numerical data, likely representing gene expression levels or similar metrics across various samples. The data is organized in a grid format with 10 columns and approximately 1000 rows.



Table with 100 columns of numerical data, representing a large dataset of values. The columns are labeled with IDs such as X42.57521mm\_pos, X16.57946mm\_pos, etc., up to X16.60477mm\_pos. Each cell contains a numerical value, likely representing a measurement or a specific data point for that ID.

Table with 10 columns of numerical data, representing a large dataset of values. The table contains approximately 1000 rows of data.



Table with 10 columns of numerical data, likely representing gene expression levels or similar metrics across various samples. The data is organized in a grid format with 10 columns and approximately 100 rows of data points.



Table with 100 columns of numerical data, likely representing a large dataset or statistical analysis. The columns are labeled with IDs such as X02.0, X02.1, etc., up to X100.0. The data is organized in a grid format with multiple rows of values.

Table with 100 columns of numerical data, likely representing a correlation matrix or a list of values for different variables. The values are small, ranging from approximately -0.49 to 0.49.

|                                                                                                                                                                                                                                                                                                                                                                                                                                                                        |             |             |             |             |             |             |             |             |             |             |             |             |             |             |             |             |             |             |             |             |             |             |             |             |
|------------------------------------------------------------------------------------------------------------------------------------------------------------------------------------------------------------------------------------------------------------------------------------------------------------------------------------------------------------------------------------------------------------------------------------------------------------------------|-------------|-------------|-------------|-------------|-------------|-------------|-------------|-------------|-------------|-------------|-------------|-------------|-------------|-------------|-------------|-------------|-------------|-------------|-------------|-------------|-------------|-------------|-------------|-------------|
| X126_750Zmp_zoo_X246_75531mp_zoo_X186_76252Zmp_zoo_X262_776038mp_zoo_X257_776038mp_zoo_X147_7785531mp_zoo_X178_7785531mp_zoo_X239_790588mp_zoo_X178_792567mp_zoo_X127_803177mp_zoo_X265_80846mp_zoo_X234_811587mp_zoo_X177_819567mp_zoo_X164_822578mp_zoo_X147_822578mp_zoo_X51_845147mp_zoo_X192_850600mp_zoo_X183_853327mp_zoo_X21_86164mp_zoo_X209_866424mp_zoo_X147_866424mp_zoo_X166_866424mp_zoo_X163_866424mp_zoo_X13_877609mp_zoo_X206_891624mp_zoo_X199891499 | -0.12380519 | -0.14026927 | -0.12264661 | -0.29151471 | -0.14023372 | -0.20030791 | -0.09142722 | -0.17647041 | -0.22311929 | -0.20372502 | -0.32053478 | -0.28291341 | -0.14043187 | -0.16028395 | -0.28249749 | -0.22907451 | -0.22892878 | -0.14010674 | -0.22364506 | -0.02000233 | -0.03711949 | -0.14795762 | -0.20372622 | -0.06179977 |
| -0.29656602                                                                                                                                                                                                                                                                                                                                                                                                                                                            | -0.14756599 | -0.22691076 | -0.23198872 | -0.25178888 | -0.23485523 | -0.23198872 | -0.17326293 | -0.13569279 | -0.13569279 | -0.13569279 | -0.13569279 | -0.13569279 | -0.13569279 | -0.13569279 | -0.13569279 | -0.13569279 | -0.13569279 | -0.13569279 | -0.13569279 | -0.13569279 | -0.13569279 | -0.13569279 | -0.13569279 | -0.13569279 |
| -0.13569279                                                                                                                                                                                                                                                                                                                                                                                                                                                            | -0.13569279 | -0.13569279 | -0.13569279 | -0.13569279 | -0.13569279 | -0.13569279 | -0.13569279 | -0.13569279 | -0.13569279 | -0.13569279 | -0.13569279 | -0.13569279 | -0.13569279 | -0.13569279 | -0.13569279 | -0.13569279 | -0.13569279 | -0.13569279 | -0.13569279 | -0.13569279 | -0.13569279 | -0.13569279 | -0.13569279 | -0.13569279 |

Table with 10 columns of numerical data, representing a large dataset of values.





Table with 100 columns of numerical data, likely representing correlation coefficients or statistical values. The table is organized into 100 columns and 100 rows, with each cell containing a numerical value.
