# Supplementary material for: Integrated analysis of the faecal metagenome and serum metabolome reveals the role of gut microbiome-associated metabolites in the detection of colorectal cancer and adenoma
Source: PubMed Central journal article supplement — Gut. 2021 Aug 30;71(7):1315–25. doi: 10.1136/gutjnl-2020-323476 (PMC9185821; doi:10.1136/gutjnl-2020-323476), 2021-08-30
Supplement: gutjnl-2020-323476supp008.pdf [file gutjnl-2020-323476supp008.pdf]

**Table S4a. Correlation coefficients of CRC affecting bacteria species with their associated metabolites.**

| Type                     | Species                         | Metabolites         | pvalue      |
|--------------------------|---------------------------------|---------------------|-------------|
| Tumor promoting bacteria | Alistipes_finegoldii            | X23.4_476.011mz_pos | 0.000000387 |
| Tumor promoting bacteria | Alistipes_finegoldii            | X21.4_494.68mz_pos  | 0.000232816 |
| Tumor promoting bacteria | Alistipes_finegoldii            | X24.5_504.692mz_pos | 0.000162744 |
| Tumor promoting bacteria | Alistipes_finegoldii            | X26.1_509.03mz_pos  | 0.000793675 |
| Tumor promoting bacteria | Alistipes_finegoldii            | X26.3_514.705mz_pos | 0.000881926 |
| Tumor promoting bacteria | Bilophila_wadsworthia           | X23.4_476.011mz_pos | 0.0000445   |
| Tumor promoting bacteria | Fusobacterium_nucleatum         | X21.2_512.336mz_neg | 0.000581862 |
| Tumor promoting bacteria | Fusobacterium_nucleatum         | X19.2_536.299mz_neg | 0.000431165 |
| Tumor promoting bacteria | Fusobacterium_sp_oral_taxon_370 | X21.2_512.336mz_neg | 0.000850936 |
| Tumor promoting bacteria | Fusobacterium_sp_oral_taxon_370 | X19.2_536.299mz_neg | 0.0000961   |
| Tumor promoting bacteria | Odoribacter_splanchnicus        | X23.4_476.011mz_pos | 0.00000193  |
| Tumor promoting bacteria | Odoribacter_splanchnicus        | X21.4_494.68mz_pos  | 0.0000338   |
| Tumor promoting bacteria | Odoribacter_splanchnicus        | X24.8_495.024mz_pos | 0.000618015 |
| Tumor promoting bacteria | Odoribacter_splanchnicus        | X22.9_499.686mz_pos | 0.000395014 |
| Tumor promoting bacteria | Odoribacter_splanchnicus        | X24.5_504.692mz_pos | 0.000898428 |
| Tumor promoting bacteria | Odoribacter_splanchnicus        | X26.1_509.03mz_pos  | 0.0000538   |
| Tumor promoting bacteria | Odoribacter_splanchnicus        | X24.5_509.699mz_pos | 0.000471107 |
| Tumor promoting bacteria | Odoribacter_splanchnicus        | X22.8_514.027mz_pos | 0.000873131 |
| Tumor promoting bacteria | Odoribacter_splanchnicus        | X28.1_519.043mz_pos | 0.00036497  |
| Tumor promoting bacteria | Odoribacter_splanchnicus        | X22.8_519.703mz_pos | 0.000941545 |
| Tumor promoting bacteria | Odoribacter_splanchnicus        | X27.6_534.052mz_pos | 0.000351569 |
| Tumor promoting bacteria | Odoribacter_splanchnicus        | X24.1_539.384mz_pos | 0.000829119 |
| Tumor promoting bacteria | Odoribacter_splanchnicus        | X22.5_543.378mz_pos | 0.000446579 |
| Tumor promoting bacteria | Odoribacter_splanchnicus        | X25.7_544.056mz_pos | 0.000751099 |
| Tumor promoting bacteria | Odoribacter_splanchnicus        | X27.3_549.062mz_pos | 0.000605254 |
| Tumor promoting bacteria | Odoribacter_splanchnicus        | X26.9_563.068mz_pos | 0.00078505  |
| Tumor promoting bacteria | Odoribacter_splanchnicus        | X28.6_568.075mz_pos | 0.00028924  |
| Tumor promoting bacteria | Odoribacter_splanchnicus        | X29.9_587.088mz_pos | 0.000433112 |
| Tumor promoting bacteria | Odoribacter_splanchnicus        | X28_597.091mz_pos   | 0.000744256 |
| Tumor promoting bacteria | Odoribacter_splanchnicus        | X21.3_635.934mz_pos | 0.000546533 |
| Tumor promoting bacteria | Parvimonas_micro                | X26.9_483.368mz_pos | 0.000267309 |
| Tumor promoting bacteria | Parvimonas_sp_oral_taxon_110    | X26.9_483.368mz_pos | 0.00000626  |
| Tumor promoting bacteria | Peptostreptococcus_stomatis     | X29.6_447.311mz_neg | 0.00014658  |
| Tumor promoting bacteria | Peptostreptococcus_stomatis     | X19.2_536.299mz_neg | 0.0000327   |
| Tumor promoting bacteria | Peptostreptococcus_stomatis     | X23.5_714.829mz_pos | 0.000873348 |
| Tumor promoting bacteria | [Clostridium]_scindens          | X9.9_193.09mz_neg   | 0.000489135 |
| Tumor promoting bacteria | [Clostridium]_scindens          | X27.4_355.227mz_pos | 0.000552826 |
| Tumor promoting bacteria | [Clostridium]_scindens          | X34.2_382.183mz_pos | 0.000552826 |
| Tumor promoting bacteria | [Clostridium]_scindens          | X9.9_386.067mz_neg  | 0.000552826 |
| Tumor promoting bacteria | [Clostridium]_scindens          | X25.9_398.179mz_neg | 0.000552826 |
| Tumor promoting bacteria | [Clostridium]_scindens          | X7_461.195mz_pos    | 0.000552826 |
| Tumor promoting bacteria | [Clostridium]_scindens          | X20.1_462.141mz_neg | 0.000552826 |
| Tumor promoting bacteria | [Clostridium]_scindens          | X22_471.005mz_pos   | 0.000552826 |
| Tumor promoting bacteria | [Clostridium]_scindens          | X28.6_475.116mz_neg | 0.000552826 |
| Tumor promoting bacteria | [Clostridium]_scindens          | X20.6_476.358mz_pos | 0.000552826 |
| Tumor promoting bacteria | [Clostridium]_scindens          | X28.5_477.13mz_pos  | 0.000812702 |
| Tumor promoting bacteria | [Clostridium]_scindens          | X21.4_494.68mz_pos  | 0.00000613  |
| Tumor promoting bacteria | [Clostridium]_scindens          | X22.8_514.027mz_pos | 0.000249066 |
| Tumor promoting bacteria | [Clostridium]_scindens          | X34.3_531.178mz_neg | 0.000552826 |
| Tumor promoting bacteria | [Clostridium]_scindens          | X21.6_542.426mz_pos | 0.000552826 |
| Tumor promoting bacteria | [Clostridium]_scindens          | X34.3_567.155mz_neg | 0.000552826 |
| Tumor promoting bacteria | [Clostridium]_scindens          | X41.9_572.415mz_pos | 0.0000614   |
| Tumor promoting bacteria | [Clostridium]_scindens          | X41.8_572.415mz_pos | 0.00000953  |
| Tumor promoting bacteria | [Clostridium]_scindens          | X25.4_629.391mz_neg | 0.000552826 |
| Tumor promoting bacteria | [Clostridium]_scindens          | X34.3_631.103mz_neg | 0.000552826 |
| Tumor promoting bacteria | [Clostridium]_scindens          | X16.7_646.473mz_pos | 0.000469578 |
| Tumor promoting bacteria | [Clostridium]_scindens          | X34.3_694.016mz_neg | 0.000552826 |
| Tumor promoting bacteria | [Clostridium]_scindens          | X25.1_702.536mz_pos | 0.000179331 |
| Tumor promoting bacteria | [Clostridium]_scindens          | X22.1_732.546mz_pos | 0.000552826 |
| Tumor promoting bacteria | [Clostridium]_scindens          | X26.2_776.038mz_pos | 0.000964522 |

|                          |                                     |                     |             |
|--------------------------|-------------------------------------|---------------------|-------------|
| Tumor promoting bacteria | [Clostridium]_scindens              | X25.7_776.038mz_pos | 0.0000131   |
| Tumor promoting bacteria | [Clostridium]_scindens              | X26.5_804.604mz_pos | 0.000552826 |
| Tumor promoting bacteria | [Clostridium]_scindens              | X19_877.609mz_pos   | 0.000552826 |
| Tumor promoting bacteria | [Clostridium]_scindens              | X19.5_938.662mz_pos | 0.000351401 |
| Tumor promoting bacteria | [Clostridium]_scindens              | X27.2_950.698mz_pos | 0.000552826 |
| Tumor promoting bacteria | [Clostridium]_scindens              | X19.2_982.688mz_pos | 0.000552826 |
| Tumor promoting bacteria | [Clostridium]_scindens              | X26.4_994.724mz_pos | 0.000552826 |
| Tumor promoting bacteria | [Clostridium]_scindens              | X26_1038.751mz_pos  | 0.000552826 |
| Tumor promoting bacteria | [Clostridium]_scindens              | X20_1040.729mz_pos  | 0.0000097   |
| Tumor promoting bacteria | [Clostridium]_scindens              | X14_432.109mz_neg   | 0.000552826 |
| Anti-tumor bacteria      | Bifidobacterium_longum              | X16_223.134mz_neg   | 0.000388097 |
| Anti-tumor bacteria      | Bifidobacterium_longum              | X16_289.106mz_neg   | 0.000534335 |
| Anti-tumor bacteria      | Bifidobacterium_longum              | X18.4_616.463mz_pos | 0.000969352 |
| Anti-tumor bacteria      | Parabacteroides_distasonis          | X23.4_476.011mz_pos | 0.00000476  |
| Anti-tumor bacteria      | Parabacteroides_distasonis          | X23.2_490.686mz_pos | 0.000515566 |
| Anti-tumor bacteria      | Parabacteroides_distasonis          | X21.4_494.68mz_pos  | 0.0000253   |
| Anti-tumor bacteria      | Parabacteroides_distasonis          | X24.8_495.024mz_pos | 0.000325704 |
| Anti-tumor bacteria      | Parabacteroides_distasonis          | X22.9_499.686mz_pos | 0.000396069 |
| Anti-tumor bacteria      | Parabacteroides_distasonis          | X26.1_509.03mz_pos  | 0.000156007 |
| Anti-tumor bacteria      | Parabacteroides_distasonis          | X24.5_509.699mz_pos | 0.000740044 |
| Anti-tumor bacteria      | Parabacteroides_distasonis          | X22.8_514.027mz_pos | 0.00085905  |
| Anti-tumor bacteria      | Parabacteroides_distasonis          | X26.3_514.705mz_pos | 0.000707717 |
| Anti-tumor bacteria      | Parabacteroides_distasonis          | X28.1_519.043mz_pos | 0.000627966 |
| Anti-tumor bacteria      | Parabacteroides_distasonis          | X27.6_534.052mz_pos | 0.000633274 |
| Anti-tumor bacteria      | Parabacteroides_distasonis          | X22.5_543.378mz_pos | 0.00027199  |
| Anti-tumor bacteria      | Parabacteroides_distasonis          | X28.6_568.075mz_pos | 0.000701341 |
| Anti-tumor bacteria      | Parabacteroides_distasonis          | X29.9_587.088mz_pos | 0.000884732 |
| others                   | Clostridiales_bacterium_VE202-26    | X9.9_193.09mz_neg   | 0.0000443   |
| others                   | Enterocloster_clostridioformis      | X9.9_193.09mz_neg   | 0.000980048 |
| others                   | Faecalibacillus_faecis              | X9.9_193.09mz_neg   | 0.000373195 |
| others                   | Firmicutes_bacterium_CAG:341        | X9.9_193.09mz_neg   | 0.000122172 |
| others                   | Hungatella_hathewayi                | X9.9_193.09mz_neg   | 0.000983322 |
| others                   | Lachnospiraceae_bacterium_5_1_57FAA | X9.9_193.09mz_neg   | 0.000320883 |
| others                   | Bifidobacterium_bifidum             | X16_223.134mz_neg   | 0.000786618 |
| others                   | Human_endogenous_retrovirus_W       | X16_223.134mz_neg   | 0.000774975 |
| others                   | Bifidobacterium_bifidum             | X16_289.106mz_neg   | 0.000716336 |
| others                   | Amedibacterium_intestinale          | X27.4_355.227mz_pos | 0.0000982   |
| others                   | Clostridiales_bacterium_VE202-01    | X27.4_355.227mz_pos | 2.81E-09    |
| others                   | Clostridiales_bacterium_VE202-26    | X27.4_355.227mz_pos | 0.000661026 |
| others                   | Clostridioides_difficile            | X27.4_355.227mz_pos | 0.0000379   |
| others                   | Erysipelatoclostridium_ramosum      | X27.4_355.227mz_pos | 0.000236163 |
| others                   | Erysipelatoclostridium_sp._An15     | X27.4_355.227mz_pos | 0.0000291   |
| others                   | Erysipelatoclostridium_sp._An173    | X27.4_355.227mz_pos | 0.000000174 |
| others                   | Erysipelotrichaceae_bacterium       | X27.4_355.227mz_pos | 0.000924475 |
| others                   | Faecalibacillus_faecis              | X27.4_355.227mz_pos | 0.000386653 |
| others                   | Lachnospiraceae_bacterium_5_1_57FAA | X27.4_355.227mz_pos | 0.000107763 |
| others                   | Amedibacterium_intestinale          | X34.2_382.183mz_pos | 0.0000982   |
| others                   | Clostridiales_bacterium_VE202-01    | X34.2_382.183mz_pos | 2.81E-09    |
| others                   | Clostridiales_bacterium_VE202-26    | X34.2_382.183mz_pos | 0.000661026 |
| others                   | Clostridioides_difficile            | X34.2_382.183mz_pos | 0.0000379   |
| others                   | Erysipelatoclostridium_ramosum      | X34.2_382.183mz_pos | 0.000236163 |
| others                   | Erysipelatoclostridium_sp._An15     | X34.2_382.183mz_pos | 0.0000291   |
| others                   | Erysipelatoclostridium_sp._An173    | X34.2_382.183mz_pos | 0.000000174 |
| others                   | Erysipelotrichaceae_bacterium       | X34.2_382.183mz_pos | 0.000924475 |
| others                   | Faecalibacillus_faecis              | X34.2_382.183mz_pos | 0.000386653 |
| others                   | Lachnospiraceae_bacterium_5_1_57FAA | X34.2_382.183mz_pos | 0.000107763 |
| others                   | Amedibacterium_intestinale          | X9.9_386.067mz_neg  | 0.0000982   |
| others                   | Clostridiales_bacterium_VE202-01    | X9.9_386.067mz_neg  | 2.81E-09    |
| others                   | Clostridiales_bacterium_VE202-26    | X9.9_386.067mz_neg  | 0.000661026 |
| others                   | Clostridioides_difficile            | X9.9_386.067mz_neg  | 0.0000379   |
| others                   | Erysipelatoclostridium_ramosum      | X9.9_386.067mz_neg  | 0.000236163 |
| others                   | Erysipelatoclostridium_sp._An15     | X9.9_386.067mz_neg  | 0.0000291   |
| others                   | Erysipelatoclostridium_sp._An173    | X9.9_386.067mz_neg  | 0.000000174 |

|        |                                     |                     |             |
|--------|-------------------------------------|---------------------|-------------|
| others | Erysipelotrichaceae_bacterium       | X9.9_386.067mz_neg  | 0.000924475 |
| others | Faecalibacillus_faecis              | X9.9_386.067mz_neg  | 0.000386653 |
| others | Lachnospiraceae_bacterium_5_1_57FAA | X9.9_386.067mz_neg  | 0.000107763 |
| others | Amedibacterium_intestinale          | X25.9_398.179mz_neg | 0.0000982   |
| others | Clostridiales_bacterium_VE202-01    | X25.9_398.179mz_neg | 2.81E-09    |
| others | Clostridiales_bacterium_VE202-26    | X25.9_398.179mz_neg | 0.000661026 |
| others | Clostridioides_difficile            | X25.9_398.179mz_neg | 0.0000379   |
| others | Erysipelatoclostridium_ramosum      | X25.9_398.179mz_neg | 0.000236163 |
| others | Erysipelatoclostridium_sp._An15     | X25.9_398.179mz_neg | 0.0000291   |
| others | Erysipelatoclostridium_sp._An173    | X25.9_398.179mz_neg | 0.000000174 |
| others | Erysipelotrichaceae_bacterium       | X25.9_398.179mz_neg | 0.000924475 |
| others | Faecalibacillus_faecis              | X25.9_398.179mz_neg | 0.000386653 |
| others | Lachnospiraceae_bacterium_5_1_57FAA | X25.9_398.179mz_neg | 0.000107763 |
| others | Amedibacterium_intestinale          | X7_461.195mz_pos    | 0.0000982   |
| others | Clostridiales_bacterium_VE202-01    | X7_461.195mz_pos    | 2.81E-09    |
| others | Clostridiales_bacterium_VE202-26    | X7_461.195mz_pos    | 0.000661026 |
| others | Clostridioides_difficile            | X7_461.195mz_pos    | 0.0000379   |
| others | Erysipelatoclostridium_ramosum      | X7_461.195mz_pos    | 0.000236163 |
| others | Erysipelatoclostridium_sp._An15     | X7_461.195mz_pos    | 0.0000291   |
| others | Erysipelatoclostridium_sp._An173    | X7_461.195mz_pos    | 0.000000174 |
| others | Erysipelotrichaceae_bacterium       | X7_461.195mz_pos    | 0.000924475 |
| others | Faecalibacillus_faecis              | X7_461.195mz_pos    | 0.000386653 |
| others | Lachnospiraceae_bacterium_5_1_57FAA | X7_461.195mz_pos    | 0.000107763 |
| others | Amedibacterium_intestinale          | X20.1_462.141mz_neg | 0.0000982   |
| others | Clostridiales_bacterium_VE202-01    | X20.1_462.141mz_neg | 2.81E-09    |
| others | Clostridiales_bacterium_VE202-26    | X20.1_462.141mz_neg | 0.000661026 |
| others | Clostridioides_difficile            | X20.1_462.141mz_neg | 0.0000379   |
| others | Erysipelatoclostridium_ramosum      | X20.1_462.141mz_neg | 0.000236163 |
| others | Erysipelatoclostridium_sp._An15     | X20.1_462.141mz_neg | 0.0000291   |
| others | Erysipelatoclostridium_sp._An173    | X20.1_462.141mz_neg | 0.000000174 |
| others | Erysipelotrichaceae_bacterium       | X20.1_462.141mz_neg | 0.000924475 |
| others | Faecalibacillus_faecis              | X20.1_462.141mz_neg | 0.000386653 |
| others | Lachnospiraceae_bacterium_5_1_57FAA | X20.1_462.141mz_neg | 0.000107763 |
| others | Amedibacterium_intestinale          | X22_471.005mz_pos   | 0.0000982   |
| others | Clostridiales_bacterium_VE202-01    | X22_471.005mz_pos   | 2.81E-09    |
| others | Clostridiales_bacterium_VE202-26    | X22_471.005mz_pos   | 0.000661026 |
| others | Clostridioides_difficile            | X22_471.005mz_pos   | 0.0000379   |
| others | Erysipelatoclostridium_ramosum      | X22_471.005mz_pos   | 0.000236163 |
| others | Erysipelatoclostridium_sp._An15     | X22_471.005mz_pos   | 0.0000291   |
| others | Erysipelatoclostridium_sp._An173    | X22_471.005mz_pos   | 0.000000174 |
| others | Erysipelotrichaceae_bacterium       | X22_471.005mz_pos   | 0.000924475 |
| others | Faecalibacillus_faecis              | X22_471.005mz_pos   | 0.000386653 |
| others | Lachnospiraceae_bacterium_5_1_57FAA | X22_471.005mz_pos   | 0.000107763 |
| others | Amedibacterium_intestinale          | X28.6_475.116mz_neg | 0.0000982   |
| others | Clostridiales_bacterium_VE202-01    | X28.6_475.116mz_neg | 2.81E-09    |
| others | Clostridiales_bacterium_VE202-26    | X28.6_475.116mz_neg | 0.000661026 |
| others | Clostridioides_difficile            | X28.6_475.116mz_neg | 0.0000379   |
| others | Erysipelatoclostridium_ramosum      | X28.6_475.116mz_neg | 0.000236163 |
| others | Erysipelatoclostridium_sp._An15     | X28.6_475.116mz_neg | 0.0000291   |
| others | Erysipelatoclostridium_sp._An173    | X28.6_475.116mz_neg | 0.000000174 |
| others | Erysipelotrichaceae_bacterium       | X28.6_475.116mz_neg | 0.000924475 |
| others | Faecalibacillus_faecis              | X28.6_475.116mz_neg | 0.000386653 |
| others | Lachnospiraceae_bacterium_5_1_57FAA | X28.6_475.116mz_neg | 0.000107763 |
| others | Alistipes_communis                  | X23.4_476.011mz_pos | 3.66E-08    |
| others | Alistipes_dispar                    | X23.4_476.011mz_pos | 0.00015587  |
| others | Alistipes_finogoldii_CAG:68         | X23.4_476.011mz_pos | 0.000135187 |
| others | Alistipes_ihumii                    | X23.4_476.011mz_pos | 0.00000765  |
| others | Alistipes_indistinctus              | X23.4_476.011mz_pos | 0.000255082 |
| others | Alistipes_onderdonkii               | X23.4_476.011mz_pos | 0.0000031   |
| others | Alistipes_provincensis              | X23.4_476.011mz_pos | 0.0000472   |
| others | Alistipes_putredinis                | X23.4_476.011mz_pos | 0.000129767 |
| others | Alistipes_putredinis_CAG:67         | X23.4_476.011mz_pos | 0.000173359 |
| others | Alistipes_senegalensis              | X23.4_476.011mz_pos | 0.000163049 |

|        |                                       |                     |             |
|--------|---------------------------------------|---------------------|-------------|
| others | Alistipes_shahii                      | X23.4_476.011mz_pos | 0.000000958 |
| others | Alistipes_sp._56_sp_Nov_56_25         | X23.4_476.011mz_pos | 0.000395059 |
| others | Alistipes_sp._58_9_plus               | X23.4_476.011mz_pos | 0.000311167 |
| others | Alistipes_sp._AF14-19                 | X23.4_476.011mz_pos | 0.0000055   |
| others | Alistipes_sp._CAG:268                 | X23.4_476.011mz_pos | 0.000029    |
| others | Alistipes_sp._CAG:29                  | X23.4_476.011mz_pos | 0.00019956  |
| others | Alistipes_sp._HGB5                    | X23.4_476.011mz_pos | 0.000000597 |
| others | Bacteroidaceae_bacterium              | X23.4_476.011mz_pos | 0.0000516   |
| others | Bacteroidales_bacterium               | X23.4_476.011mz_pos | 0.00000202  |
| others | Bacteroides_acidifaciens              | X23.4_476.011mz_pos | 0.0000306   |
| others | Bacteroides_caccae                    | X23.4_476.011mz_pos | 0.0000115   |
| others | Bacteroides_cellulosilyticus          | X23.4_476.011mz_pos | 0.0000164   |
| others | Bacteroides_clarus                    | X23.4_476.011mz_pos | 0.00000429  |
| others | Bacteroides_clarus_CAG:160            | X23.4_476.011mz_pos | 0.00000676  |
| others | Bacteroides_congonensis               | X23.4_476.011mz_pos | 0.0000885   |
| others | Bacteroides_eggerthii                 | X23.4_476.011mz_pos | 0.00000515  |
| others | Bacteroides_faecis                    | X23.4_476.011mz_pos | 0.0000136   |
| others | Bacteroides_faecis_CAG:32             | X23.4_476.011mz_pos | 0.0000494   |
| others | Bacteroides_fingoldii                 | X23.4_476.011mz_pos | 0.0000593   |
| others | Bacteroides_fingoldii_CAG:203         | X23.4_476.011mz_pos | 0.000069    |
| others | Bacteroides_fluxus                    | X23.4_476.011mz_pos | 0.00000187  |
| others | Bacteroides_ilei                      | X23.4_476.011mz_pos | 0.0000851   |
| others | Bacteroides_intestinalis              | X23.4_476.011mz_pos | 0.000246617 |
| others | Bacteroides_nordii                    | X23.4_476.011mz_pos | 0.0000619   |
| others | Bacteroides_ovatus                    | X23.4_476.011mz_pos | 0.000148039 |
| others | Bacteroides_salyersiae                | X23.4_476.011mz_pos | 0.000174985 |
| others | Bacteroides_sp._2_2_4                 | X23.4_476.011mz_pos | 0.0000321   |
| others | Bacteroides_sp._3_1_19                | X23.4_476.011mz_pos | 0.00000509  |
| others | Bacteroides_sp._3_1_40A               | X23.4_476.011mz_pos | 0.000731975 |
| others | Bacteroides_sp._44_46                 | X23.4_476.011mz_pos | 0.00000366  |
| others | Bacteroides_sp._4_1_36                | X23.4_476.011mz_pos | 0.00000288  |
| others | Bacteroides_sp._9_1_42FAA             | X23.4_476.011mz_pos | 0.000178045 |
| others | Bacteroides_sp._AM16-15               | X23.4_476.011mz_pos | 0.0000623   |
| others | Bacteroides_sp._AM26-11               | X23.4_476.011mz_pos | 0.000210582 |
| others | Bacteroides_sp._CAG:633               | X23.4_476.011mz_pos | 0.0000879   |
| others | Bacteroides_sp._CAG:754               | X23.4_476.011mz_pos | 0.0000725   |
| others | Bacteroides_sp._D2                    | X23.4_476.011mz_pos | 0.0000995   |
| others | Bacteroides_sp._D20                   | X23.4_476.011mz_pos | 0.000000978 |
| others | Bacteroides_sp._D22                   | X23.4_476.011mz_pos | 0.000522127 |
| others | Bacteroides_sp._HPS0048               | X23.4_476.011mz_pos | 0.000116192 |
| others | Bacteroides_sp._NMBE5                 | X23.4_476.011mz_pos | 1.9E-10     |
| others | Bacteroides_sp._OF03-11BH             | X23.4_476.011mz_pos | 0.00000466  |
| others | Bacteroides_sp._OF04-15BH             | X23.4_476.011mz_pos | 0.000149929 |
| others | Bacteroides_sp._OM08-17BH             | X23.4_476.011mz_pos | 0.0000108   |
| others | Bacteroides_stercoris                 | X23.4_476.011mz_pos | 0.0000695   |
| others | Bacteroides_stercoris_CAG:120         | X23.4_476.011mz_pos | 0.00000651  |
| others | Bacteroides_thetaiotaomicron          | X23.4_476.011mz_pos | 0.00000416  |
| others | Bacteroides_uniformis                 | X23.4_476.011mz_pos | 0.000000575 |
| others | Bacteroides_xylanisolvens             | X23.4_476.011mz_pos | 0.000419175 |
| others | Bacteroidetes_bacterium_ADurb.BinA104 | X23.4_476.011mz_pos | 0.000232949 |
| others | Barnesiella_intestinihominis          | X23.4_476.011mz_pos | 0.000155133 |
| others | Butyrlicimonas_faecalis               | X23.4_476.011mz_pos | 0.0000339   |
| others | Butyrlicimonas_faecihominis           | X23.4_476.011mz_pos | 0.00000409  |
| others | Butyrlicimonas_paravirosa             | X23.4_476.011mz_pos | 0.0000946   |
| others | Butyrlicimonas_sp._Marseille-P3923    | X23.4_476.011mz_pos | 0.00000248  |
| others | Butyrlicimonas_virosa                 | X23.4_476.011mz_pos | 0.0000827   |
| others | Clostridiales_bacterium_59_14         | X23.4_476.011mz_pos | 0.000216966 |
| others | Coprobacter_fastidiosus               | X23.4_476.011mz_pos | 0.000529565 |
| others | Coprobacter_secundus                  | X23.4_476.011mz_pos | 0.000000342 |
| others | Cronobacter_sakazakii                 | X23.4_476.011mz_pos | 0.000803201 |
| others | Desulfovibrio_fairfieldensis          | X23.4_476.011mz_pos | 0.000201863 |
| others | Desulfovibrio_legallii                | X23.4_476.011mz_pos | 0.0000146   |
| others | Desulfovibrio_piger                   | X23.4_476.011mz_pos | 0.000692565 |



|        |                                     |                     |             |
|--------|-------------------------------------|---------------------|-------------|
| others | Enterobacter_hormaechei             | X23.4_476.011mz_pos | 0.00021778  |
| others | Erysipelatoclostridium_ramosum      | X23.4_476.011mz_pos | 0.000608748 |
| others | Eubacterium_sp._45_250              | X23.4_476.011mz_pos | 0.000459415 |
| others | Firmicutes_bacterium_CAG:103        | X23.4_476.011mz_pos | 0.000447385 |
| others | Firmicutes_bacterium_CAG:124        | X23.4_476.011mz_pos | 0.000301852 |
| others | Firmicutes_bacterium_CAG:129        | X23.4_476.011mz_pos | 0.000214362 |
| others | Firmicutes_bacterium_CAG:129_59_24  | X23.4_476.011mz_pos | 0.0000568   |
| others | Firmicutes_bacterium_CAG:170        | X23.4_476.011mz_pos | 0.000448731 |
| others | Firmicutes_bacterium_CAG:176_63_11  | X23.4_476.011mz_pos | 0.000772856 |
| others | Firmicutes_bacterium_CAG:24053_14   | X23.4_476.011mz_pos | 0.0000307   |
| others | Firmicutes_bacterium_CAG:466        | X23.4_476.011mz_pos | 0.000728712 |
| others | Firmicutes_bacterium_CAG:83         | X23.4_476.011mz_pos | 0.000251494 |
| others | Intestinimonas_butyriciproducens    | X23.4_476.011mz_pos | 0.000369213 |
| others | Methanobrevibacter_smithii          | X23.4_476.011mz_pos | 0.000714593 |
| others | Parabacteroides_bouchesdurhonensis  | X23.4_476.011mz_pos | 0.00059477  |
| others | Parabacteroides_goldsteinii         | X23.4_476.011mz_pos | 0.000221186 |
| others | Parabacteroides_johnsonii           | X23.4_476.011mz_pos | 0.00000112  |
| others | Parabacteroides_massiliensis        | X23.4_476.011mz_pos | 0.0000184   |
| others | Parabacteroides_merdae              | X23.4_476.011mz_pos | 0.00000658  |
| others | Parabacteroides_sp._20_3            | X23.4_476.011mz_pos | 0.0000399   |
| others | Parabacteroides_sp._AM58-2XD        | X23.4_476.011mz_pos | 0.00032565  |
| others | Parabacteroides_sp._CAG:409         | X23.4_476.011mz_pos | 0.000327283 |
| others | Parabacteroides_sp._D13             | X23.4_476.011mz_pos | 0.00000178  |
| others | Parabacteroides_sp._TM07-1AC        | X23.4_476.011mz_pos | 0.000200907 |
| others | Paraprevotella_clara                | X23.4_476.011mz_pos | 0.0000511   |
| others | Paraprevotella_clara_CAG:116        | X23.4_476.011mz_pos | 0.00000139  |
| others | Paraprevotella_xylaniphila          | X23.4_476.011mz_pos | 0.0000293   |
| others | Phascolarctobacterium_succinatutens | X23.4_476.011mz_pos | 0.000358421 |
| others | Phocaeicola_dorei                   | X23.4_476.011mz_pos | 0.000713804 |
| others | Prevotella_bivia                    | X23.4_476.011mz_pos | 0.0000233   |
| others | Prevotella_intermedia               | X23.4_476.011mz_pos | 0.000929236 |
| others | Prevotella_marseillensis            | X23.4_476.011mz_pos | 0.000193247 |
| others | Prevotella_rara                     | X23.4_476.011mz_pos | 0.000381681 |
| others | Prevotella_sp._CAG:891              | X23.4_476.011mz_pos | 0.000506141 |
| others | Prevotella_sp._MGM2                 | X23.4_476.011mz_pos | 0.000276786 |
| others | Prevotella_sp._P3-122               | X23.4_476.011mz_pos | 0.0000451   |
| others | Rikenellaceae_bacterium             | X23.4_476.011mz_pos | 0.000000951 |
| others | Ruthenibacterium_lactatiformans     | X23.4_476.011mz_pos | 0.000574391 |
| others | Salmonella_enterica                 | X23.4_476.011mz_pos | 0.000446965 |
| others | Streptococcus_pneumoniae            | X23.4_476.011mz_pos | 0.000282439 |
| others | uncultured_Bacteroides_sp.          | X23.4_476.011mz_pos | 0.0000953   |
| others | Amedibacterium_intestinale          | X20.6_476.358mz_pos | 0.0000982   |
| others | Clostridiales_bacterium_VE202-01    | X20.6_476.358mz_pos | 2.81E-09    |
| others | Clostridiales_bacterium_VE202-26    | X20.6_476.358mz_pos | 0.000661026 |
| others | Clostridioides_difficile            | X20.6_476.358mz_pos | 0.0000379   |
| others | Erysipelatoclostridium_ramosum      | X20.6_476.358mz_pos | 0.000236163 |
| others | Erysipelatoclostridium_sp._An15     | X20.6_476.358mz_pos | 0.0000291   |
| others | Erysipelatoclostridium_sp._An173    | X20.6_476.358mz_pos | 0.000000174 |
| others | Erysipelotrichaceae_bacterium       | X20.6_476.358mz_pos | 0.000924475 |
| others | Faecalibacillus_faecis              | X20.6_476.358mz_pos | 0.000386653 |
| others | Lachnospiraceae_bacterium_5_1_57FAA | X20.6_476.358mz_pos | 0.000107763 |
| others | Clostridiales_bacterium_VE202-01    | X28.5_477.13mz_pos  | 0.00000191  |
| others | Clostridiales_bacterium_VE202-26    | X28.5_477.13mz_pos  | 0.000626054 |
| others | Clostridioides_difficile            | X28.5_477.13mz_pos  | 0.000825165 |
| others | Clostridium_sp._CAG:169             | X28.5_477.13mz_pos  | 0.000144458 |
| others | Erysipelatoclostridium_sp._An15     | X28.5_477.13mz_pos  | 0.0000151   |
| others | Erysipelatoclostridium_sp._An173    | X28.5_477.13mz_pos  | 0.00000117  |
| others | Faecalibacillus_faecis              | X28.5_477.13mz_pos  | 0.000137414 |
| others | Lachnospiraceae_bacterium_5_1_57FAA | X28.5_477.13mz_pos  | 0.000474585 |
| others | Prevotella_intermedia               | X26.9_483.368mz_pos | 0.000791742 |
| others | Bacteroides_eggerthii               | X23.2_490.686mz_pos | 0.000351714 |
| others | Bacteroides_sp._3_1_19              | X23.2_490.686mz_pos | 0.00038014  |
| others | Bacteroides_sp._NMBE5               | X23.2_490.686mz_pos | 0.00045569  |

|        |                                       |                     |             |
|--------|---------------------------------------|---------------------|-------------|
| others | Parabacteroides_merdae                | X23.2_490.686mz_pos | 0.000959236 |
| others | Parabacteroides_sp._D13               | X23.2_490.686mz_pos | 0.000506827 |
| others | Paraprevotella_clara_CAG:116          | X23.2_490.686mz_pos | 0.000502848 |
| others | Alistipes_communis                    | X21.4_494.68mz_pos  | 0.000782917 |
| others | Alistipes_ihumii                      | X21.4_494.68mz_pos  | 0.000547848 |
| others | Alistipes_onderdonkii                 | X21.4_494.68mz_pos  | 0.000636042 |
| others | Alistipes_sp._AF14-19                 | X21.4_494.68mz_pos  | 0.000237341 |
| others | Alistipes_sp._HGB5                    | X21.4_494.68mz_pos  | 0.000363221 |
| others | Bacteroidaceae_bacterium              | X21.4_494.68mz_pos  | 0.000166383 |
| others | Bacteroidales_bacterium               | X21.4_494.68mz_pos  | 0.0000957   |
| others | Bacteroides_caccae                    | X21.4_494.68mz_pos  | 0.000126971 |
| others | Bacteroides_cellulosilyticus          | X21.4_494.68mz_pos  | 0.000289405 |
| others | Bacteroides_clarus                    | X21.4_494.68mz_pos  | 0.000493953 |
| others | Bacteroides_clarus_CAG:160            | X21.4_494.68mz_pos  | 0.000288205 |
| others | Bacteroides_congonensis               | X21.4_494.68mz_pos  | 0.000215344 |
| others | Bacteroides_eggerthii                 | X21.4_494.68mz_pos  | 0.0000785   |
| others | Bacteroides_faecis                    | X21.4_494.68mz_pos  | 0.0000616   |
| others | Bacteroides_finegoldii                | X21.4_494.68mz_pos  | 0.000713623 |
| others | Bacteroides_fluxus                    | X21.4_494.68mz_pos  | 0.000289987 |
| others | Bacteroides_ovatus                    | X21.4_494.68mz_pos  | 0.000251035 |
| others | Bacteroides_sp._2_2_4                 | X21.4_494.68mz_pos  | 0.0000695   |
| others | Bacteroides_sp._3_1_19                | X21.4_494.68mz_pos  | 0.0000135   |
| others | Bacteroides_sp._3_1_40A               | X21.4_494.68mz_pos  | 0.0000098   |
| others | Bacteroides_sp._44_46                 | X21.4_494.68mz_pos  | 0.000536114 |
| others | Bacteroides_sp._4_1_36                | X21.4_494.68mz_pos  | 0.000172942 |
| others | Bacteroides_sp._4_3_47FAA             | X21.4_494.68mz_pos  | 0.000505528 |
| others | Bacteroides_sp._9_1_42FAA             | X21.4_494.68mz_pos  | 0.0000542   |
| others | Bacteroides_sp._AM16-15               | X21.4_494.68mz_pos  | 0.0000556   |
| others | Bacteroides_sp._AM26-11               | X21.4_494.68mz_pos  | 0.000201777 |
| others | Bacteroides_sp._AM28-6                | X21.4_494.68mz_pos  | 0.00069271  |
| others | Bacteroides_sp._CAG:633               | X21.4_494.68mz_pos  | 0.0000695   |
| others | Bacteroides_sp._CAG:754               | X21.4_494.68mz_pos  | 0.000291265 |
| others | Bacteroides_sp._D20                   | X21.4_494.68mz_pos  | 0.0000161   |
| others | Bacteroides_sp._D22                   | X21.4_494.68mz_pos  | 0.0000658   |
| others | Bacteroides_sp._NMBE5                 | X21.4_494.68mz_pos  | 0.000104227 |
| others | Bacteroides_sp._OF03-11BH             | X21.4_494.68mz_pos  | 0.000373521 |
| others | Bacteroides_stercoris                 | X21.4_494.68mz_pos  | 0.000567863 |
| others | Bacteroides_thetaiotaomicron          | X21.4_494.68mz_pos  | 0.000472705 |
| others | Bacteroides_uniformis                 | X21.4_494.68mz_pos  | 0.0000247   |
| others | Bacteroides_xylanisolvans             | X21.4_494.68mz_pos  | 0.000372556 |
| others | Bacteroidetes_bacterium_ADurb.BinA104 | X21.4_494.68mz_pos  | 0.000101002 |
| others | Blautia_hansenii                      | X21.4_494.68mz_pos  | 0.000603006 |
| others | Blautia_producta                      | X21.4_494.68mz_pos  | 0.000688257 |
| others | Blautia_sp._Marseille-P3201T          | X21.4_494.68mz_pos  | 0.0008456   |
| others | Butyrlicimonas_faecalis               | X21.4_494.68mz_pos  | 0.000485957 |
| others | Butyrlicimonas_faecihominis           | X21.4_494.68mz_pos  | 0.0000396   |
| others | Butyrlicimonas_sp._Marseille-P3923    | X21.4_494.68mz_pos  | 0.000141806 |
| others | Clostridiales_bacterium_VE202-01      | X21.4_494.68mz_pos  | 0.000163674 |
| others | Clostridioides_difficile              | X21.4_494.68mz_pos  | 0.000777628 |
| others | Coprobacter_fastidiosus               | X21.4_494.68mz_pos  | 0.000747298 |
| others | Coprobacter_secundus                  | X21.4_494.68mz_pos  | 0.000841376 |
| others | Dorea_sp._D27                         | X21.4_494.68mz_pos  | 0.000121936 |
| others | Erysipelatoclostridium_amosum         | X21.4_494.68mz_pos  | 0.0000288   |
| others | Erysipelatoclostridium_sp._An15       | X21.4_494.68mz_pos  | 0.0000682   |
| others | Erysipelatoclostridium_sp._An173      | X21.4_494.68mz_pos  | 0.000281047 |
| others | Lachnospiraceae_bacterium_5_1_57FAA   | X21.4_494.68mz_pos  | 0.000125555 |
| others | Lachnospiraceae_bacterium_6_1_63FAA   | X21.4_494.68mz_pos  | 0.000664878 |
| others | Parabacteroides_johnsonii             | X21.4_494.68mz_pos  | 0.000158902 |
| others | Parabacteroides_merdae                | X21.4_494.68mz_pos  | 0.000185766 |
| others | Parabacteroides_sp._20_3              | X21.4_494.68mz_pos  | 0.0000227   |
| others | Parabacteroides_sp._D13               | X21.4_494.68mz_pos  | 0.0000482   |
| others | Paraprevotella_clara                  | X21.4_494.68mz_pos  | 0.000362892 |
| others | Phocaeicola_dorei                     | X21.4_494.68mz_pos  | 0.000126509 |

|        |                                   |                     |             |
|--------|-----------------------------------|---------------------|-------------|
| others | Phocaeicola_vulgatus              | X21.4_494.68mz_pos  | 0.000202661 |
| others | Prevotella_bivia                  | X21.4_494.68mz_pos  | 0.0000333   |
| others | Prevotella_intermedia             | X21.4_494.68mz_pos  | 0.000319938 |
| others | Shigella_flexneri                 | X21.4_494.68mz_pos  | 0.000994577 |
| others | uncultured_Bacteroides_sp.        | X21.4_494.68mz_pos  | 0.000140887 |
| others | Bacteroides_eggerthii             | X24.8_495.024mz_pos | 0.000211876 |
| others | Bacteroides_faecis                | X24.8_495.024mz_pos | 0.000982299 |
| others | Bacteroides_sp._3_1_19            | X24.8_495.024mz_pos | 0.000191926 |
| others | Bacteroides_sp._NMBE5             | X24.8_495.024mz_pos | 0.0000361   |
| others | Bacteroides_stercoris             | X24.8_495.024mz_pos | 0.000858282 |
| others | Parabacteroides_merdae            | X24.8_495.024mz_pos | 0.000398945 |
| others | Parabacteroides_sp._20_3          | X24.8_495.024mz_pos | 0.000999516 |
| others | Parabacteroides_sp._D13           | X24.8_495.024mz_pos | 0.000209759 |
| others | Paraprevotella_clara              | X24.8_495.024mz_pos | 0.000697734 |
| others | Paraprevotella_clara_CAG:116      | X24.8_495.024mz_pos | 0.0000499   |
| others | Paraprevotella_xylaniphila        | X24.8_495.024mz_pos | 0.000609684 |
| others | Prevotella_bivia                  | X24.8_495.024mz_pos | 0.000952543 |
| others | Bacteroides_sp._3_1_19            | X22.9_499.686mz_pos | 0.000136178 |
| others | Bacteroides_sp._NMBE5             | X22.9_499.686mz_pos | 0.000371589 |
| others | Butyricimonas_faecihominis        | X22.9_499.686mz_pos | 0.000992573 |
| others | Parabacteroides_sp._D13           | X22.9_499.686mz_pos | 0.000629281 |
| others | Alistipes_communis                | X24.5_504.692mz_pos | 0.000166373 |
| others | Alistipes_ihumii                  | X24.5_504.692mz_pos | 0.000254131 |
| others | Alistipes_indistinctus            | X24.5_504.692mz_pos | 0.000656826 |
| others | Alistipes_onderdonkii             | X24.5_504.692mz_pos | 0.000726132 |
| others | Alistipes_shahii                  | X24.5_504.692mz_pos | 0.000420513 |
| others | Alistipes_sp._AF14-19             | X24.5_504.692mz_pos | 0.00088918  |
| others | Alistipes_sp._HGB5                | X24.5_504.692mz_pos | 0.000178379 |
| others | Bacteroides_eggerthii             | X24.5_504.692mz_pos | 0.000701252 |
| others | Bacteroides_fluxus                | X24.5_504.692mz_pos | 0.000362137 |
| others | Bacteroides_sp._44_46             | X24.5_504.692mz_pos | 0.000387592 |
| others | Bacteroides_sp._D20               | X24.5_504.692mz_pos | 0.000279725 |
| others | Bacteroides_sp._NMBE5             | X24.5_504.692mz_pos | 0.000055    |
| others | Bacteroides_stercoris_CAG:120     | X24.5_504.692mz_pos | 0.000737599 |
| others | Bacteroides_uniformis             | X24.5_504.692mz_pos | 0.000262456 |
| others | Butyricimonas_faecihominis        | X24.5_504.692mz_pos | 0.000436346 |
| others | Clostridiales_bacterium_VE202-01  | X24.5_504.692mz_pos | 0.000529536 |
| others | Desulfovibrio_legallii            | X24.5_504.692mz_pos | 0.000750348 |
| others | Firmicutes_bacterium_CAG:24053_14 | X24.5_504.692mz_pos | 0.00085144  |
| others | Paraprevotella_clara_CAG:116      | X24.5_504.692mz_pos | 0.000279787 |
| others | Rikenellaceae_bacterium           | X24.5_504.692mz_pos | 0.000489212 |
| others | Alistipes_ihumii                  | X26.1_509.03mz_pos  | 0.000745179 |
| others | Alistipes_sp._AF14-19             | X26.1_509.03mz_pos  | 0.000633543 |
| others | Alistipes_sp._HGB5                | X26.1_509.03mz_pos  | 0.000436554 |
| others | Bacteroides_faecis                | X26.1_509.03mz_pos  | 0.000624275 |
| others | Bacteroides_sp._3_1_19            | X26.1_509.03mz_pos  | 0.0000835   |
| others | Bacteroides_sp._4_1_36            | X26.1_509.03mz_pos  | 0.000908415 |
| others | Bacteroides_sp._D20               | X26.1_509.03mz_pos  | 0.000309698 |
| others | Bacteroides_sp._NMBE5             | X26.1_509.03mz_pos  | 0.00015681  |
| others | Bacteroides_uniformis             | X26.1_509.03mz_pos  | 0.0004387   |
| others | Butyricimonas_faecalis            | X26.1_509.03mz_pos  | 0.000877486 |
| others | Butyricimonas_faecihominis        | X26.1_509.03mz_pos  | 0.000110851 |
| others | Parabacteroides_sp._20_3          | X26.1_509.03mz_pos  | 0.000345465 |
| others | Parabacteroides_sp._D13           | X26.1_509.03mz_pos  | 0.000251671 |
| others | Paraprevotella_clara_CAG:116      | X26.1_509.03mz_pos  | 0.000361764 |
| others | Prevotella_bivia                  | X26.1_509.03mz_pos  | 0.000998916 |
| others | Bacteroides_caccae                | X24.5_509.699mz_pos | 0.000849861 |
| others | Bacteroides_sp._3_1_19            | X24.5_509.699mz_pos | 0.000410771 |
| others | Bacteroides_sp._NMBE5             | X24.5_509.699mz_pos | 0.000021    |
| others | Parabacteroides_merdae            | X24.5_509.699mz_pos | 0.000613595 |
| others | Parabacteroides_sp._D13           | X24.5_509.699mz_pos | 0.000507127 |
| others | Paraprevotella_clara_CAG:116      | X24.5_509.699mz_pos | 0.00013234  |
| others | Paraprevotella_xylaniphila        | X24.5_509.699mz_pos | 0.000549849 |

|        |                                     |                     |             |
|--------|-------------------------------------|---------------------|-------------|
| others | Amedibacterium_intestinale          | X22.8_514.027mz_pos | 0.00040322  |
| others | Bacteroidales_bacterium             | X22.8_514.027mz_pos | 0.000856633 |
| others | Bacteroides_sp._3_1_19              | X22.8_514.027mz_pos | 0.000353054 |
| others | Bacteroides_sp._AM16-15             | X22.8_514.027mz_pos | 0.000772476 |
| others | Bacteroides_sp._NMBE5               | X22.8_514.027mz_pos | 0.000409592 |
| others | Blautia_sp._Marseille-P3201T        | X22.8_514.027mz_pos | 0.00057685  |
| others | Clostridioides_difficile            | X22.8_514.027mz_pos | 0.000751909 |
| others | Erysipelatoclostridium_sp._An15     | X22.8_514.027mz_pos | 0.000447135 |
| others | Intestinibacter_bartlettii          | X22.8_514.027mz_pos | 0.000282196 |
| others | Lachnospiraceae_bacterium_5_1_57FAA | X22.8_514.027mz_pos | 0.000222015 |
| others | Lachnospiraceae_bacterium_6_1_63FAA | X22.8_514.027mz_pos | 0.000423294 |
| others | Parabacteroides_merdae              | X22.8_514.027mz_pos | 0.000455062 |
| others | Parabacteroides_sp._20_3            | X22.8_514.027mz_pos | 0.000985353 |
| others | Peptostreptococcaceae_bacterium     | X22.8_514.027mz_pos | 0.0000597   |
| others | Prevotella_intermedia               | X22.8_514.027mz_pos | 0.000476531 |
| others | uncultured_Bacteroides_sp.          | X22.8_514.027mz_pos | 0.000770087 |
| others | Alistipes_ihumii                    | X26.3_514.705mz_pos | 0.000480135 |
| others | Alistipes_indistinctus              | X26.3_514.705mz_pos | 0.000831906 |
| others | Alistipes_onderdonkii               | X26.3_514.705mz_pos | 0.000754885 |
| others | Bacteroidales_bacterium             | X26.3_514.705mz_pos | 0.000624263 |
| others | Bacteroides_eggerthii               | X26.3_514.705mz_pos | 0.000701272 |
| others | Bacteroides_sp._3_1_19              | X26.3_514.705mz_pos | 0.00072793  |
| others | Coprobacter_secundus                | X26.3_514.705mz_pos | 0.000613667 |
| others | Parabacteroides_sp._D13             | X26.3_514.705mz_pos | 0.000566295 |
| others | Paraprevotella_clara                | X26.3_514.705mz_pos | 0.000564362 |
| others | Paraprevotella_clara_CAG:116        | X26.3_514.705mz_pos | 0.0000505   |
| others | Paraprevotella_xylaniphila          | X26.3_514.705mz_pos | 0.000320385 |
| others | Bacteroides_caccae                  | X28.1_519.043mz_pos | 0.000735419 |
| others | Bacteroides_sp._3_1_19              | X28.1_519.043mz_pos | 0.00037083  |
| others | Bacteroides_sp._NMBE5               | X28.1_519.043mz_pos | 0.0000468   |
| others | Bacteroides_stercoris               | X28.1_519.043mz_pos | 0.000946482 |
| others | Parabacteroides_merdae              | X28.1_519.043mz_pos | 0.000474456 |
| others | Parabacteroides_sp._D13             | X28.1_519.043mz_pos | 0.00035902  |
| others | Paraprevotella_clara                | X28.1_519.043mz_pos | 0.000733103 |
| others | Paraprevotella_clara_CAG:116        | X28.1_519.043mz_pos | 0.0000805   |
| others | Paraprevotella_xylaniphila          | X28.1_519.043mz_pos | 0.000384942 |
| others | Prevotella_sp._CAG:891              | X28.1_519.043mz_pos | 0.000657322 |
| others | Bacteroides_sp._3_1_19              | X22.8_519.703mz_pos | 0.000919577 |
| others | Bacteroides_sp._NMBE5               | X22.8_519.703mz_pos | 0.0000373   |
| others | Parabacteroides_merdae              | X22.8_519.703mz_pos | 0.000874345 |
| others | Paraprevotella_clara_CAG:116        | X22.8_519.703mz_pos | 0.000235708 |
| others | Paraprevotella_xylaniphila          | X22.8_519.703mz_pos | 0.000837452 |
| others | Amedibacterium_intestinale          | X34.3_531.178mz_neg | 0.0000982   |
| others | Clostridiales_bacterium_VE202-01    | X34.3_531.178mz_neg | 2.81E-09    |
| others | Clostridiales_bacterium_VE202-26    | X34.3_531.178mz_neg | 0.000661026 |
| others | Clostridioides_difficile            | X34.3_531.178mz_neg | 0.0000379   |
| others | Erysipelatoclostridium_amosum       | X34.3_531.178mz_neg | 0.000236163 |
| others | Erysipelatoclostridium_sp._An15     | X34.3_531.178mz_neg | 0.0000291   |
| others | Erysipelatoclostridium_sp._An173    | X34.3_531.178mz_neg | 0.000000174 |
| others | Erysipelotrichaceae_bacterium       | X34.3_531.178mz_neg | 0.000924475 |
| others | Faecalibacillus_faecis              | X34.3_531.178mz_neg | 0.000386653 |
| others | Lachnospiraceae_bacterium_5_1_57FAA | X34.3_531.178mz_neg | 0.000107763 |
| others | Bacteroides_caccae                  | X27.6_534.052mz_pos | 0.000715823 |
| others | Bacteroides_sp._3_1_19              | X27.6_534.052mz_pos | 0.000365582 |
| others | Bacteroides_sp._NMBE5               | X27.6_534.052mz_pos | 0.0000323   |
| others | Bacteroides_stercoris               | X27.6_534.052mz_pos | 0.000987658 |
| others | Parabacteroides_merdae              | X27.6_534.052mz_pos | 0.000476079 |
| others | Parabacteroides_sp._D13             | X27.6_534.052mz_pos | 0.000384145 |
| others | Paraprevotella_clara                | X27.6_534.052mz_pos | 0.00078406  |
| others | Paraprevotella_clara_CAG:116        | X27.6_534.052mz_pos | 0.0000929   |
| others | Paraprevotella_xylaniphila          | X27.6_534.052mz_pos | 0.000399652 |
| others | Prevotella_sp._CAG:891              | X27.6_534.052mz_pos | 0.000664055 |
| others | Fusobacterium_pseudoperiodonticum   | X19.2_536.299mz_neg | 0.000123234 |



|        |                                     |                     |             |
|--------|-------------------------------------|---------------------|-------------|
| others | Bacteroides_sp._3_1_19              | X24.1_539.384mz_pos | 0.000913223 |
| others | Bacteroides_sp._NMBE5               | X24.1_539.384mz_pos | 0.0000269   |
| others | Parabacteroides_merdae              | X24.1_539.384mz_pos | 0.000830644 |
| others | Paraprevotella_clara_CAG:116        | X24.1_539.384mz_pos | 0.000190233 |
| others | Paraprevotella_xylaniphila          | X24.1_539.384mz_pos | 0.0007068   |
| others | Prevotella_sp._CAG:891              | X24.1_539.384mz_pos | 0.000834384 |
| others | Amedibacterium_intestinale          | X21.6_542.426mz_pos | 0.0000982   |
| others | Clostridiales_bacterium_VE202-01    | X21.6_542.426mz_pos | 2.81E-09    |
| others | Clostridiales_bacterium_VE202-26    | X21.6_542.426mz_pos | 0.000661026 |
| others | Clostridioides_difficile            | X21.6_542.426mz_pos | 0.0000379   |
| others | Erysipelatoclostridium_amosum       | X21.6_542.426mz_pos | 0.000236163 |
| others | Erysipelatoclostridium_sp._An15     | X21.6_542.426mz_pos | 0.0000291   |
| others | Erysipelatoclostridium_sp._An173    | X21.6_542.426mz_pos | 0.000000174 |
| others | Erysipelotrichaceae_bacterium       | X21.6_542.426mz_pos | 0.000924475 |
| others | Faecalibacillus_faecis              | X21.6_542.426mz_pos | 0.000386653 |
| others | Lachnospiraceae_bacterium_5_1_57FAA | X21.6_542.426mz_pos | 0.000107763 |
| others | Bacteroides_eggerthii               | X22.5_543.378mz_pos | 0.000161605 |
| others | Bacteroides_faecis                  | X22.5_543.378mz_pos | 0.000638737 |
| others | Bacteroides_sp._3_1_19              | X22.5_543.378mz_pos | 0.000209274 |
| others | Bacteroides_sp._AM16-15             | X22.5_543.378mz_pos | 0.000995176 |
| others | Bacteroides_sp._AM26-11             | X22.5_543.378mz_pos | 0.000369334 |
| others | Bacteroides_sp._NMBE5               | X22.5_543.378mz_pos | 0.000335807 |
| others | Bacteroides_stercoris               | X22.5_543.378mz_pos | 0.000896963 |
| others | Coprobacter_fastidiosus             | X22.5_543.378mz_pos | 0.000761775 |
| others | Parabacteroides_johnsonii           | X22.5_543.378mz_pos | 0.000699738 |
| others | Parabacteroides_merdae              | X22.5_543.378mz_pos | 0.000164539 |
| others | Parabacteroides_sp._20_3            | X22.5_543.378mz_pos | 0.000381104 |
| others | Parabacteroides_sp._D13             | X22.5_543.378mz_pos | 0.000227157 |
| others | Paraprevotella_clara                | X22.5_543.378mz_pos | 0.000687816 |
| others | Paraprevotella_clara_CAG:116        | X22.5_543.378mz_pos | 0.000180864 |
| others | Phocaeicola_vulgatus                | X22.5_543.378mz_pos | 0.00090115  |
| others | Prevotella_bivia                    | X22.5_543.378mz_pos | 0.000851319 |
| others | Bacteroides_sp._3_1_19              | X25.7_544.056mz_pos | 0.000766591 |
| others | Bacteroides_sp._NMBE5               | X25.7_544.056mz_pos | 0.0000317   |
| others | Parabacteroides_merdae              | X25.7_544.056mz_pos | 0.000671126 |
| others | Parabacteroides_sp._D13             | X25.7_544.056mz_pos | 0.000841295 |
| others | Paraprevotella_clara_CAG:116        | X25.7_544.056mz_pos | 0.000168999 |
| others | Paraprevotella_xylaniphila          | X25.7_544.056mz_pos | 0.000475742 |
| others | Prevotella_sp._CAG:891              | X25.7_544.056mz_pos | 0.00065608  |
| others | Bacteroidales_bacterium_KA00251     | X27.3_549.062mz_pos | 0.000890245 |
| others | Bacteroides_caccae                  | X27.3_549.062mz_pos | 0.000737885 |
| others | Bacteroides_sp._3_1_19              | X27.3_549.062mz_pos | 0.000681554 |
| others | Bacteroides_sp._NMBE5               | X27.3_549.062mz_pos | 0.0000438   |
| others | Parabacteroides_merdae              | X27.3_549.062mz_pos | 0.000534433 |
| others | Parabacteroides_sp._D13             | X27.3_549.062mz_pos | 0.000589509 |
| others | Paraprevotella_clara                | X27.3_549.062mz_pos | 0.000889925 |
| others | Paraprevotella_clara_CAG:116        | X27.3_549.062mz_pos | 0.0000769   |
| others | Paraprevotella_xylaniphila          | X27.3_549.062mz_pos | 0.000399492 |
| others | Prevotella_sp._CAG:891              | X27.3_549.062mz_pos | 0.000500494 |
| others | Bacteroidales_bacterium_KA00251     | X26.9_563.068mz_pos | 0.000863573 |
| others | Bacteroides_caccae                  | X26.9_563.068mz_pos | 0.000810444 |
| others | Bacteroides_sp._3_1_19              | X26.9_563.068mz_pos | 0.00098682  |
| others | Bacteroides_sp._NMBE5               | X26.9_563.068mz_pos | 0.0000308   |
| others | Parabacteroides_merdae              | X26.9_563.068mz_pos | 0.000685576 |
| others | Parabacteroides_sp._D13             | X26.9_563.068mz_pos | 0.000865038 |
| others | Paraprevotella_clara_CAG:116        | X26.9_563.068mz_pos | 0.000108125 |
| others | Paraprevotella_xylaniphila          | X26.9_563.068mz_pos | 0.000447447 |
| others | Prevotella_sp._CAG:891              | X26.9_563.068mz_pos | 0.000398023 |
| others | Amedibacterium_intestinale          | X34.3_567.155mz_neg | 0.0000982   |
| others | Clostridiales_bacterium_VE202-01    | X34.3_567.155mz_neg | 2.81E-09    |
| others | Clostridiales_bacterium_VE202-26    | X34.3_567.155mz_neg | 0.000661026 |
| others | Clostridioides_difficile            | X34.3_567.155mz_neg | 0.0000379   |
| others | Erysipelatoclostridium_amosum       | X34.3_567.155mz_neg | 0.000236163 |

|        |                                     |                     |             |
|--------|-------------------------------------|---------------------|-------------|
| others | Erysipelatoclostridium_sp._An15     | X34.3_567.155mz_neg | 0.0000291   |
| others | Erysipelatoclostridium_sp._An173    | X34.3_567.155mz_neg | 0.000000174 |
| others | Erysipelotrichaceae_bacterium       | X34.3_567.155mz_neg | 0.000924475 |
| others | Faecalibacillus_faecis              | X34.3_567.155mz_neg | 0.000386653 |
| others | Lachnospiraceae_bacterium_5_1_57FAA | X34.3_567.155mz_neg | 0.000107763 |
| others | Bacteroidales_bacterium_KA00251     | X28.6_568.075mz_pos | 0.000156614 |
| others | Bacteroides_caccae                  | X28.6_568.075mz_pos | 0.000832615 |
| others | Bacteroides_ilei                    | X28.6_568.075mz_pos | 0.00088044  |
| others | Bacteroides_sp._3_1_19              | X28.6_568.075mz_pos | 0.000396887 |
| others | Bacteroides_sp._AM16-15             | X28.6_568.075mz_pos | 0.000974229 |
| others | Bacteroides_sp._NMBE5               | X28.6_568.075mz_pos | 0.0000275   |
| others | Bacteroides_sp._OF04-15BH           | X28.6_568.075mz_pos | 0.000726112 |
| others | Bacteroides_stercoris               | X28.6_568.075mz_pos | 0.000527501 |
| others | Bacteroides_stercoris_CAG:120       | X28.6_568.075mz_pos | 0.000677491 |
| others | Methanobrevibacter_smithii          | X28.6_568.075mz_pos | 0.000848424 |
| others | Parabacteroides_merdae              | X28.6_568.075mz_pos | 0.00069684  |
| others | Parabacteroides_sp._CAG:409         | X28.6_568.075mz_pos | 0.000817142 |
| others | Parabacteroides_sp._D13             | X28.6_568.075mz_pos | 0.00031115  |
| others | Paraprevotella_clara                | X28.6_568.075mz_pos | 0.00043493  |
| others | Paraprevotella_clara_CAG:116        | X28.6_568.075mz_pos | 0.0000289   |
| others | Paraprevotella_xylaniphila          | X28.6_568.075mz_pos | 0.000156185 |
| others | Prevotella_bivia                    | X28.6_568.075mz_pos | 0.000887081 |
| others | Prevotella_sp._CAG:891              | X28.6_568.075mz_pos | 0.000361095 |
| others | Clostridiales_bacterium_VE202-26    | X41.9_572.415mz_pos | 0.00000743  |
| others | Dorea_sp._D27                       | X41.9_572.415mz_pos | 0.000926141 |
| others | Erysipelatoclostridium_sp._An15     | X41.9_572.415mz_pos | 0.000068    |
| others | Erysipelatoclostridium_sp._An173    | X41.9_572.415mz_pos | 0.000647254 |
| others | Lachnospiraceae_bacterium_5_1_57FAA | X41.9_572.415mz_pos | 0.0000542   |
| others | Blautia_producta                    | X41.8_572.415mz_pos | 0.000851419 |
| others | Clostridiales_bacterium_VE202-01    | X41.8_572.415mz_pos | 0.0000351   |
| others | Clostridiales_bacterium_VE202-26    | X41.8_572.415mz_pos | 0.00000394  |
| others | Clostridioides_difficile            | X41.8_572.415mz_pos | 0.00033941  |
| others | Dorea_sp._D27                       | X41.8_572.415mz_pos | 0.000261635 |
| others | Erysipelatoclostridium_ramosum      | X41.8_572.415mz_pos | 0.000387476 |
| others | Erysipelatoclostridium_sp._An15     | X41.8_572.415mz_pos | 0.0000736   |
| others | Erysipelatoclostridium_sp._An173    | X41.8_572.415mz_pos | 0.00000918  |
| others | Lachnospiraceae_bacterium_5_1_57FAA | X41.8_572.415mz_pos | 0.0000151   |
| others | Sutterella_sp._AM11-39              | X41.8_572.415mz_pos | 0.00029884  |
| others | Bacteroidales_bacterium_KA00251     | X29.9_587.088mz_pos | 0.000566318 |
| others | Bacteroides_caccae                  | X29.9_587.088mz_pos | 0.000647311 |
| others | Bacteroides_sp._3_1_19              | X29.9_587.088mz_pos | 0.000562561 |
| others | Bacteroides_sp._NMBE5               | X29.9_587.088mz_pos | 0.0001179   |
| others | Bacteroides_sp._OF04-15BH           | X29.9_587.088mz_pos | 0.000795978 |
| others | Methanobrevibacter_smithii          | X29.9_587.088mz_pos | 0.000712419 |
| others | Parabacteroides_merdae              | X29.9_587.088mz_pos | 0.000479369 |
| others | Parabacteroides_sp._CAG:409         | X29.9_587.088mz_pos | 0.000730331 |
| others | Parabacteroides_sp._D13             | X29.9_587.088mz_pos | 0.000419011 |
| others | Paraprevotella_clara                | X29.9_587.088mz_pos | 0.00069802  |
| others | Paraprevotella_clara_CAG:116        | X29.9_587.088mz_pos | 0.0000661   |
| others | Paraprevotella_xylaniphila          | X29.9_587.088mz_pos | 0.000309011 |
| others | Prevotella_sp._CAG:891              | X29.9_587.088mz_pos | 0.000347005 |
| others | Bacteroidales_bacterium_KA00251     | X28_597.091mz_pos   | 0.000608847 |
| others | Bacteroides_caccae                  | X28_597.091mz_pos   | 0.000615772 |
| others | Bacteroides_sp._NMBE5               | X28_597.091mz_pos   | 0.000121319 |
| others | Parabacteroides_merdae              | X28_597.091mz_pos   | 0.000715752 |
| others | Parabacteroides_sp._D13             | X28_597.091mz_pos   | 0.000833222 |
| others | Paraprevotella_clara                | X28_597.091mz_pos   | 0.000761471 |
| others | Paraprevotella_clara_CAG:116        | X28_597.091mz_pos   | 0.0000732   |
| others | Paraprevotella_xylaniphila          | X28_597.091mz_pos   | 0.00013867  |
| others | Prevotella_sp._CAG:891              | X28_597.091mz_pos   | 0.000369241 |
| others | Bacteroides_sp._NMBE5               | X18.4_616.463mz_pos | 0.000612236 |
| others | Amedibacterium_intestinale          | X25.4_629.391mz_neg | 0.0000982   |
| others | Clostridiales_bacterium_VE202-01    | X25.4_629.391mz_neg | 2.81E-09    |

|        |                                     |                     |             |
|--------|-------------------------------------|---------------------|-------------|
| others | Clostridiales_bacterium_VE202-26    | X25.4_629.391mz_neg | 0.000661026 |
| others | Clostridioides_difficile            | X25.4_629.391mz_neg | 0.0000379   |
| others | Erysipelatoclostridium_ramosum      | X25.4_629.391mz_neg | 0.000236163 |
| others | Erysipelatoclostridium_sp_An15      | X25.4_629.391mz_neg | 0.0000291   |
| others | Erysipelatoclostridium_sp_An173     | X25.4_629.391mz_neg | 0.000000174 |
| others | Erysipelotrichaceae_bacterium       | X25.4_629.391mz_neg | 0.000924475 |
| others | Faecalibacillus_faecis              | X25.4_629.391mz_neg | 0.000386653 |
| others | Lachnospiraceae_bacterium_5_1_57FAA | X25.4_629.391mz_neg | 0.000107763 |
| others | Amedibacterium_intestinale          | X34.3_631.103mz_neg | 0.0000982   |
| others | Clostridiales_bacterium_VE202-01    | X34.3_631.103mz_neg | 2.81E-09    |
| others | Clostridiales_bacterium_VE202-26    | X34.3_631.103mz_neg | 0.000661026 |
| others | Clostridioides_difficile            | X34.3_631.103mz_neg | 0.0000379   |
| others | Erysipelatoclostridium_ramosum      | X34.3_631.103mz_neg | 0.000236163 |
| others | Erysipelatoclostridium_sp_An15      | X34.3_631.103mz_neg | 0.0000291   |
| others | Erysipelatoclostridium_sp_An173     | X34.3_631.103mz_neg | 0.000000174 |
| others | Erysipelotrichaceae_bacterium       | X34.3_631.103mz_neg | 0.000924475 |
| others | Faecalibacillus_faecis              | X34.3_631.103mz_neg | 0.000386653 |
| others | Lachnospiraceae_bacterium_5_1_57FAA | X34.3_631.103mz_neg | 0.000107763 |
| others | Clostridiales_bacterium_VE202-01    | X16.7_646.473mz_pos | 0.000202478 |
| others | Erysipelatoclostridium_sp_An15      | X16.7_646.473mz_pos | 0.000104902 |
| others | Erysipelatoclostridium_sp_An173     | X16.7_646.473mz_pos | 0.0000752   |
| others | Lachnospiraceae_bacterium_5_1_57FAA | X16.7_646.473mz_pos | 0.000414862 |
| others | Amedibacterium_intestinale          | X34.3_694.016mz_neg | 0.0000982   |
| others | Clostridiales_bacterium_VE202-01    | X34.3_694.016mz_neg | 2.81E-09    |
| others | Clostridiales_bacterium_VE202-26    | X34.3_694.016mz_neg | 0.000661026 |
| others | Clostridioides_difficile            | X34.3_694.016mz_neg | 0.0000379   |
| others | Erysipelatoclostridium_ramosum      | X34.3_694.016mz_neg | 0.000236163 |
| others | Erysipelatoclostridium_sp_An15      | X34.3_694.016mz_neg | 0.0000291   |
| others | Erysipelatoclostridium_sp_An173     | X34.3_694.016mz_neg | 0.000000174 |
| others | Erysipelotrichaceae_bacterium       | X34.3_694.016mz_neg | 0.000924475 |
| others | Faecalibacillus_faecis              | X34.3_694.016mz_neg | 0.000386653 |
| others | Lachnospiraceae_bacterium_5_1_57FAA | X34.3_694.016mz_neg | 0.000107763 |
| others | Clostridiales_bacterium_VE202-26    | X25.1_702.536mz_pos | 0.0000373   |
| others | Erysipelatoclostridium_sp_An173     | X25.1_702.536mz_pos | 0.000949987 |
| others | Lachnospiraceae_bacterium_5_1_57FAA | X25.1_702.536mz_pos | 0.000673879 |
| others | Amedibacterium_intestinale          | X22.1_732.546mz_pos | 0.0000982   |
| others | Clostridiales_bacterium_VE202-01    | X22.1_732.546mz_pos | 2.81E-09    |
| others | Clostridiales_bacterium_VE202-26    | X22.1_732.546mz_pos | 0.000661026 |
| others | Clostridioides_difficile            | X22.1_732.546mz_pos | 0.0000379   |
| others | Erysipelatoclostridium_ramosum      | X22.1_732.546mz_pos | 0.000236163 |
| others | Erysipelatoclostridium_sp_An15      | X22.1_732.546mz_pos | 0.0000291   |
| others | Erysipelatoclostridium_sp_An173     | X22.1_732.546mz_pos | 0.000000174 |
| others | Erysipelotrichaceae_bacterium       | X22.1_732.546mz_pos | 0.000924475 |
| others | Faecalibacillus_faecis              | X22.1_732.546mz_pos | 0.000386653 |
| others | Lachnospiraceae_bacterium_5_1_57FAA | X22.1_732.546mz_pos | 0.000107763 |
| others | Amedibacterium_intestinale          | X25.7_776.038mz_pos | 0.000205757 |
| others | Clostridiales_bacterium_VE202-26    | X25.7_776.038mz_pos | 0.000428271 |
| others | Intestinibacter_bartlettii          | X25.7_776.038mz_pos | 0.0000274   |
| others | Lachnospiraceae_bacterium_5_1_57FAA | X25.7_776.038mz_pos | 0.000165168 |
| others | Peptostreptococcaceae_bacterium     | X25.7_776.038mz_pos | 0.000274962 |
| others | Amedibacterium_intestinale          | X26.5_804.604mz_pos | 0.0000982   |
| others | Clostridiales_bacterium_VE202-01    | X26.5_804.604mz_pos | 2.81E-09    |
| others | Clostridiales_bacterium_VE202-26    | X26.5_804.604mz_pos | 0.000661026 |
| others | Clostridioides_difficile            | X26.5_804.604mz_pos | 0.0000379   |
| others | Erysipelatoclostridium_ramosum      | X26.5_804.604mz_pos | 0.000236163 |
| others | Erysipelatoclostridium_sp_An15      | X26.5_804.604mz_pos | 0.0000291   |
| others | Erysipelatoclostridium_sp_An173     | X26.5_804.604mz_pos | 0.000000174 |
| others | Erysipelotrichaceae_bacterium       | X26.5_804.604mz_pos | 0.000924475 |
| others | Faecalibacillus_faecis              | X26.5_804.604mz_pos | 0.000386653 |
| others | Lachnospiraceae_bacterium_5_1_57FAA | X26.5_804.604mz_pos | 0.000107763 |
| others | Amedibacterium_intestinale          | X19_877.609mz_pos   | 0.0000982   |
| others | Clostridiales_bacterium_VE202-01    | X19_877.609mz_pos   | 2.81E-09    |
| others | Clostridiales_bacterium_VE202-26    | X19_877.609mz_pos   | 0.000661026 |

|        |                                     |                     |             |
|--------|-------------------------------------|---------------------|-------------|
| others | Clostridioides_difficile            | X19_877.609mz_pos   | 0.0000379   |
| others | Erysipelatoclostridium_ramosum      | X19_877.609mz_pos   | 0.000236163 |
| others | Erysipelatoclostridium_sp._An15     | X19_877.609mz_pos   | 0.0000291   |
| others | Erysipelatoclostridium_sp._An173    | X19_877.609mz_pos   | 0.000000174 |
| others | Erysipelotrichaceae_bacterium       | X19_877.609mz_pos   | 0.000924475 |
| others | Faecalibacillus_faecis              | X19_877.609mz_pos   | 0.000386653 |
| others | Lachnospiraceae_bacterium_5_1_57FAA | X19_877.609mz_pos   | 0.000107763 |
| others | Amedibacterium_intestinale          | X19.5_938.662mz_pos | 0.000292248 |
| others | Clostridiales_bacterium_VE202-01    | X19.5_938.662mz_pos | 0.00000213  |
| others | Clostridioides_difficile            | X19.5_938.662mz_pos | 0.000312775 |
| others | Clostridium_sp._AT4                 | X19.5_938.662mz_pos | 0.000276508 |
| others | Dorea_sp._D27                       | X19.5_938.662mz_pos | 0.000710786 |
| others | Erysipelatoclostridium_ramosum      | X19.5_938.662mz_pos | 0.0000318   |
| others | Erysipelatoclostridium_sp._An15     | X19.5_938.662mz_pos | 0.0000678   |
| others | Erysipelatoclostridium_sp._An173    | X19.5_938.662mz_pos | 0.0000873   |
| others | Lachnospiraceae_bacterium_5_1_57FAA | X19.5_938.662mz_pos | 0.000836637 |
| others | Amedibacterium_intestinale          | X27.2_950.698mz_pos | 0.0000982   |
| others | Clostridiales_bacterium_VE202-01    | X27.2_950.698mz_pos | 2.81E-09    |
| others | Clostridiales_bacterium_VE202-26    | X27.2_950.698mz_pos | 0.000661026 |
| others | Clostridioides_difficile            | X27.2_950.698mz_pos | 0.0000379   |
| others | Erysipelatoclostridium_ramosum      | X27.2_950.698mz_pos | 0.000236163 |
| others | Erysipelatoclostridium_sp._An15     | X27.2_950.698mz_pos | 0.0000291   |
| others | Erysipelatoclostridium_sp._An173    | X27.2_950.698mz_pos | 0.000000174 |
| others | Erysipelotrichaceae_bacterium       | X27.2_950.698mz_pos | 0.000924475 |
| others | Faecalibacillus_faecis              | X27.2_950.698mz_pos | 0.000386653 |
| others | Lachnospiraceae_bacterium_5_1_57FAA | X27.2_950.698mz_pos | 0.000107763 |
| others | Amedibacterium_intestinale          | X19.2_982.688mz_pos | 0.0000982   |
| others | Clostridiales_bacterium_VE202-01    | X19.2_982.688mz_pos | 2.81E-09    |
| others | Clostridiales_bacterium_VE202-26    | X19.2_982.688mz_pos | 0.000661026 |
| others | Clostridioides_difficile            | X19.2_982.688mz_pos | 0.0000379   |
| others | Erysipelatoclostridium_ramosum      | X19.2_982.688mz_pos | 0.000236163 |
| others | Erysipelatoclostridium_sp._An15     | X19.2_982.688mz_pos | 0.0000291   |
| others | Erysipelatoclostridium_sp._An173    | X19.2_982.688mz_pos | 0.000000174 |
| others | Erysipelotrichaceae_bacterium       | X19.2_982.688mz_pos | 0.000924475 |
| others | Faecalibacillus_faecis              | X19.2_982.688mz_pos | 0.000386653 |
| others | Lachnospiraceae_bacterium_5_1_57FAA | X19.2_982.688mz_pos | 0.000107763 |
| others | Amedibacterium_intestinale          | X26.4_994.724mz_pos | 0.0000982   |
| others | Clostridiales_bacterium_VE202-01    | X26.4_994.724mz_pos | 2.81E-09    |
| others | Clostridiales_bacterium_VE202-26    | X26.4_994.724mz_pos | 0.000661026 |
| others | Clostridioides_difficile            | X26.4_994.724mz_pos | 0.0000379   |
| others | Erysipelatoclostridium_ramosum      | X26.4_994.724mz_pos | 0.000236163 |
| others | Erysipelatoclostridium_sp._An15     | X26.4_994.724mz_pos | 0.0000291   |
| others | Erysipelatoclostridium_sp._An173    | X26.4_994.724mz_pos | 0.000000174 |
| others | Erysipelotrichaceae_bacterium       | X26.4_994.724mz_pos | 0.000924475 |
| others | Faecalibacillus_faecis              | X26.4_994.724mz_pos | 0.000386653 |
| others | Lachnospiraceae_bacterium_5_1_57FAA | X26.4_994.724mz_pos | 0.000107763 |
| others | Amedibacterium_intestinale          | X26_1038.751mz_pos  | 0.0000982   |
| others | Clostridiales_bacterium_VE202-01    | X26_1038.751mz_pos  | 2.81E-09    |
| others | Clostridiales_bacterium_VE202-26    | X26_1038.751mz_pos  | 0.000661026 |
| others | Clostridioides_difficile            | X26_1038.751mz_pos  | 0.0000379   |
| others | Erysipelatoclostridium_ramosum      | X26_1038.751mz_pos  | 0.000236163 |
| others | Erysipelatoclostridium_sp._An15     | X26_1038.751mz_pos  | 0.0000291   |
| others | Erysipelatoclostridium_sp._An173    | X26_1038.751mz_pos  | 0.000000174 |
| others | Erysipelotrichaceae_bacterium       | X26_1038.751mz_pos  | 0.000924475 |
| others | Faecalibacillus_faecis              | X26_1038.751mz_pos  | 0.000386653 |
| others | Lachnospiraceae_bacterium_5_1_57FAA | X26_1038.751mz_pos  | 0.000107763 |
| others | Blautia_producta                    | X20_1040.729mz_pos  | 0.000877877 |
| others | Clostridiales_bacterium_VE202-01    | X20_1040.729mz_pos  | 0.0000401   |
| others | Clostridiales_bacterium_VE202-26    | X20_1040.729mz_pos  | 0.00000397  |
| others | Clostridioides_difficile            | X20_1040.729mz_pos  | 0.000362537 |
| others | Dorea_sp._D27                       | X20_1040.729mz_pos  | 0.000268934 |
| others | Erysipelatoclostridium_ramosum      | X20_1040.729mz_pos  | 0.000406664 |
| others | Erysipelatoclostridium_sp._An15     | X20_1040.729mz_pos  | 0.0000786   |



|        |                                     |                     |             |
|--------|-------------------------------------|---------------------|-------------|
| others | Erysipelatoclostridium_sp._An173    | X20_1040.729mz_pos  | 0.0000103   |
| others | Lachnospiraceae_bacterium_5_1_57FAA | X20_1040.729mz_pos  | 0.0000158   |
| others | Sutterella_sp._AM11-39              | X20_1040.729mz_pos  | 0.000262191 |
| others | Amedibacterium_intestinale          | X14_432.109mz_neg   | 0.0000982   |
| others | Clostridiales_bacterium_VE202-01    | X14_432.109mz_neg   | 2.81E-09    |
| others | Clostridiales_bacterium_VE202-26    | X14_432.109mz_neg   | 0.000661026 |
| others | Clostridioides_difficile            | X14_432.109mz_neg   | 0.0000379   |
| others | Erysipelatoclostridium_ramosum      | X14_432.109mz_neg   | 0.000236163 |
| others | Erysipelatoclostridium_sp._An15     | X14_432.109mz_neg   | 0.0000291   |
| others | Erysipelatoclostridium_sp._An173    | X14_432.109mz_neg   | 0.000000174 |
| others | Erysipelotrichaceae_bacterium       | X14_432.109mz_neg   | 0.000924475 |
| others | Faecalibacillus_faecis              | X14_432.109mz_neg   | 0.000386653 |
| others | Lachnospiraceae_bacterium_5_1_57FAA | X14_432.109mz_neg   | 0.000107763 |
| others | Bacteroidales_bacterium_KA00251     | X21.3_635.934mz_pos | 0.0000175   |
| others | Bacteroides_ilei                    | X21.3_635.934mz_pos | 0.000348037 |
| others | Bacteroides_sp._3_1_19              | X21.3_635.934mz_pos | 0.000953838 |
| others | Bacteroides_sp._NMBE5               | X21.3_635.934mz_pos | 0.0000877   |
| others | Bacteroides_sp._OF04-15BH           | X21.3_635.934mz_pos | 0.000401382 |
| others | Bacteroides_stercoris               | X21.3_635.934mz_pos | 0.000483549 |
| others | Bacteroides_stercoris_CAG:120       | X21.3_635.934mz_pos | 0.000406466 |
| others | Methanobrevibacter_smithii          | X21.3_635.934mz_pos | 0.00097126  |
| others | Parabacteroides_sp._CAG:409         | X21.3_635.934mz_pos | 0.000481461 |
| others | Parabacteroides_sp._D13             | X21.3_635.934mz_pos | 0.000640588 |
| others | Paraprevotella_clara                | X21.3_635.934mz_pos | 0.00047228  |
| others | Paraprevotella_clara_CAG:116        | X21.3_635.934mz_pos | 0.0000279   |
| others | Paraprevotella_xylaniphila          | X21.3_635.934mz_pos | 0.000167047 |
| others | Prevotella_sp._CAG:891              | X21.3_635.934mz_pos | 0.0003158   |
| others | Bacteroidales_bacterium_KA00251     | X23.5_714.829mz_pos | 0.00086088  |
| others | Prevotella_sp._885                  | X23.5_714.829mz_pos | 0.000475227 |
