# Supplementary material for: Integrated analysis of the faecal metagenome and serum metabolome reveals the role of gut microbiome-associated metabolites in the detection of colorectal cancer and adenoma
Source: PubMed Central journal article supplement — Gut. 2021 Aug 30;71(7):1315–25. doi: 10.1136/gutjnl-2020-323476 (PMC9185821; doi:10.1136/gutjnl-2020-323476), 2021-08-30
Supplement: gutjnl-2020-323476supp009.pdf [file gutjnl-2020-323476supp009.pdf]

**Table S4b. Significantly upregulated or down regulated gut microbiome species among the species of Table S4a.**

| Type                     | species                            | fc (C vs. N) | anova_value |
|--------------------------|------------------------------------|--------------|-------------|
| Tumor promoting bacteria | Fusobacterium_nucleatum            | 61.4         | 0.001557353 |
| Tumor promoting bacteria | Fusobacterium_sp_oral_taxon_370    | 363          | 0.001382275 |
| Tumor promoting bacteria | Parvimonas_micra                   | 57.1         | 0.028318681 |
| Anti-tumor bacteria      | Bifidobacterium_longum             | 0.398        | 0.037244477 |
| others                   | Enterobacter_hormaechei            | 6.23         | 0.021654033 |
| others                   | Firmicutes_bacterium_CAG:129       | 13.3         | 0.04279676  |
| others                   | Firmicutes_bacterium_CAG:176_63_11 | 24.1         | 0.024980046 |
| others                   | Intestinimonas_butyriciproducens   | 4            | 0.047651565 |
| others                   | Peptostreptococcaceae_bacterium    | 0.602        | 0.049086807 |
| others                   | Fusobacterium_pseudoperiodonticum  | 44.6         | 0.003420016 |
| others                   | Bacteroidales_bacterium_KA00251    | 139          | 0.035594929 |
| others                   | Clostridium_sp_AT4                 | 0.495        | 0.011020144 |
