# Supplementary material for: Integrated analysis of the faecal metagenome and serum metabolome reveals the role of gut microbiome-associated metabolites in the detection of colorectal cancer and adenoma
Source: PubMed Central journal article supplement — Gut. 2021 Aug 30;71(7):1315–25. doi: 10.1136/gutjnl-2020-323476 (PMC9185821; doi:10.1136/gutjnl-2020-323476), 2021-08-30
Supplement: gutjnl-2020-323476supp010.pdf [file gutjnl-2020-323476supp010.pdf]

**Table S5. Result for feature selection by 200 LASSO runs using the untargeted metabolomics data in the discovery cohort**

| Var1                | Freq |
|---------------------|------|
| X10.3_193.09mz_neg  | 200  |
| X10.3_380.033mz_neg | 200  |
| X13.6_289.164mz_pos | 200  |
| X13_329.233mz_neg   | 200  |
| X13_750.519mz_pos   | 200  |
| X14.3_329.233mz_neg | 200  |
| X14.7_357.228mz_neg | 200  |
| X16.8_420.807mz_pos | 200  |
| X16.9_637.157mz_neg | 200  |
| X17_448.315mz_pos   | 200  |
| X19.9_637.105mz_pos | 200  |
| X21.3_612.425mz_pos | 200  |
| X21.4_512.336mz_neg | 200  |
| X22.7_543.376mz_pos | 200  |
| X23.4_490.686mz_pos | 200  |
| X26.2_398.18mz_neg  | 200  |
| X26.6_483.297mz_neg | 200  |
| X27.8_353.212mz_neg | 200  |
| X28.5_368.169mz_neg | 200  |
| X29.3_319.264mz_neg | 200  |
| X29.9_447.312mz_neg | 200  |
| X33.6_279.233mz_neg | 200  |
| X34.6_578.25mz_pos  | 200  |
| X42.1_572.415mz_pos | 200  |
| X7.4_461.196mz_pos  | 200  |
| X28.9_475.116mz_neg | 180  |
| X14.2_513.363mz_pos | 177  |
| X26.7_502.015mz_pos | 177  |
| X7.8_384.259mz_pos  | 177  |
| X24_355.228mz_neg   | 152  |
| X1_197.068mz_neg    | 150  |
| X15.9_584.729mz_pos | 150  |
