# Supplementary figures and images for: Integrated analysis of the faecal metagenome and serum metabolome reveals the role of gut microbiome-associated metabolites in the detection of colorectal cancer and adenoma
Source: PubMed Central journal article supplement — Gut. 2021 Aug 30;71(7):1315–25. doi: 10.1136/gutjnl-2020-323476 (PMC9185821; doi:10.1136/gutjnl-2020-323476), 2021-08-30

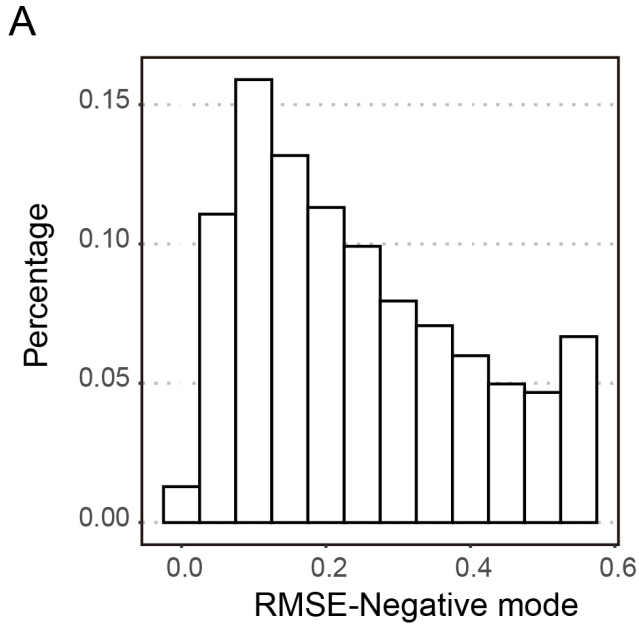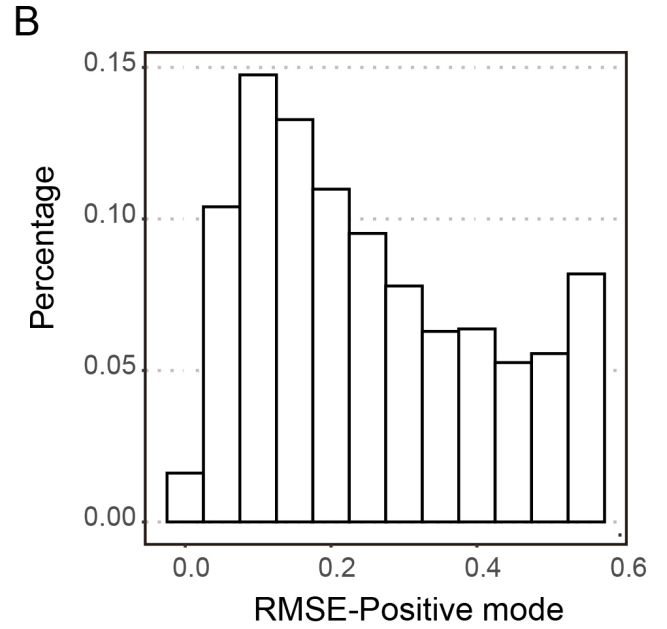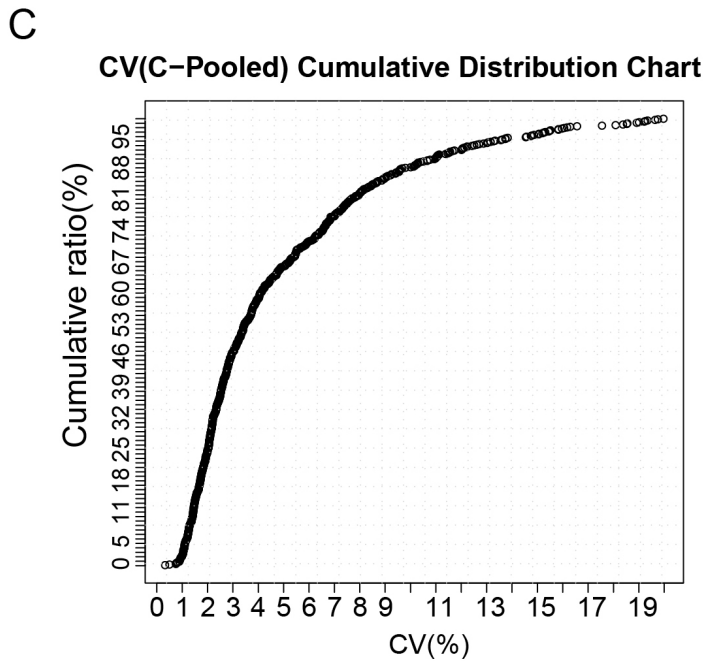

Supplement: gutjnl-2020-323476supp002.pdf [file gutjnl-2020-323476supp002.pdf]

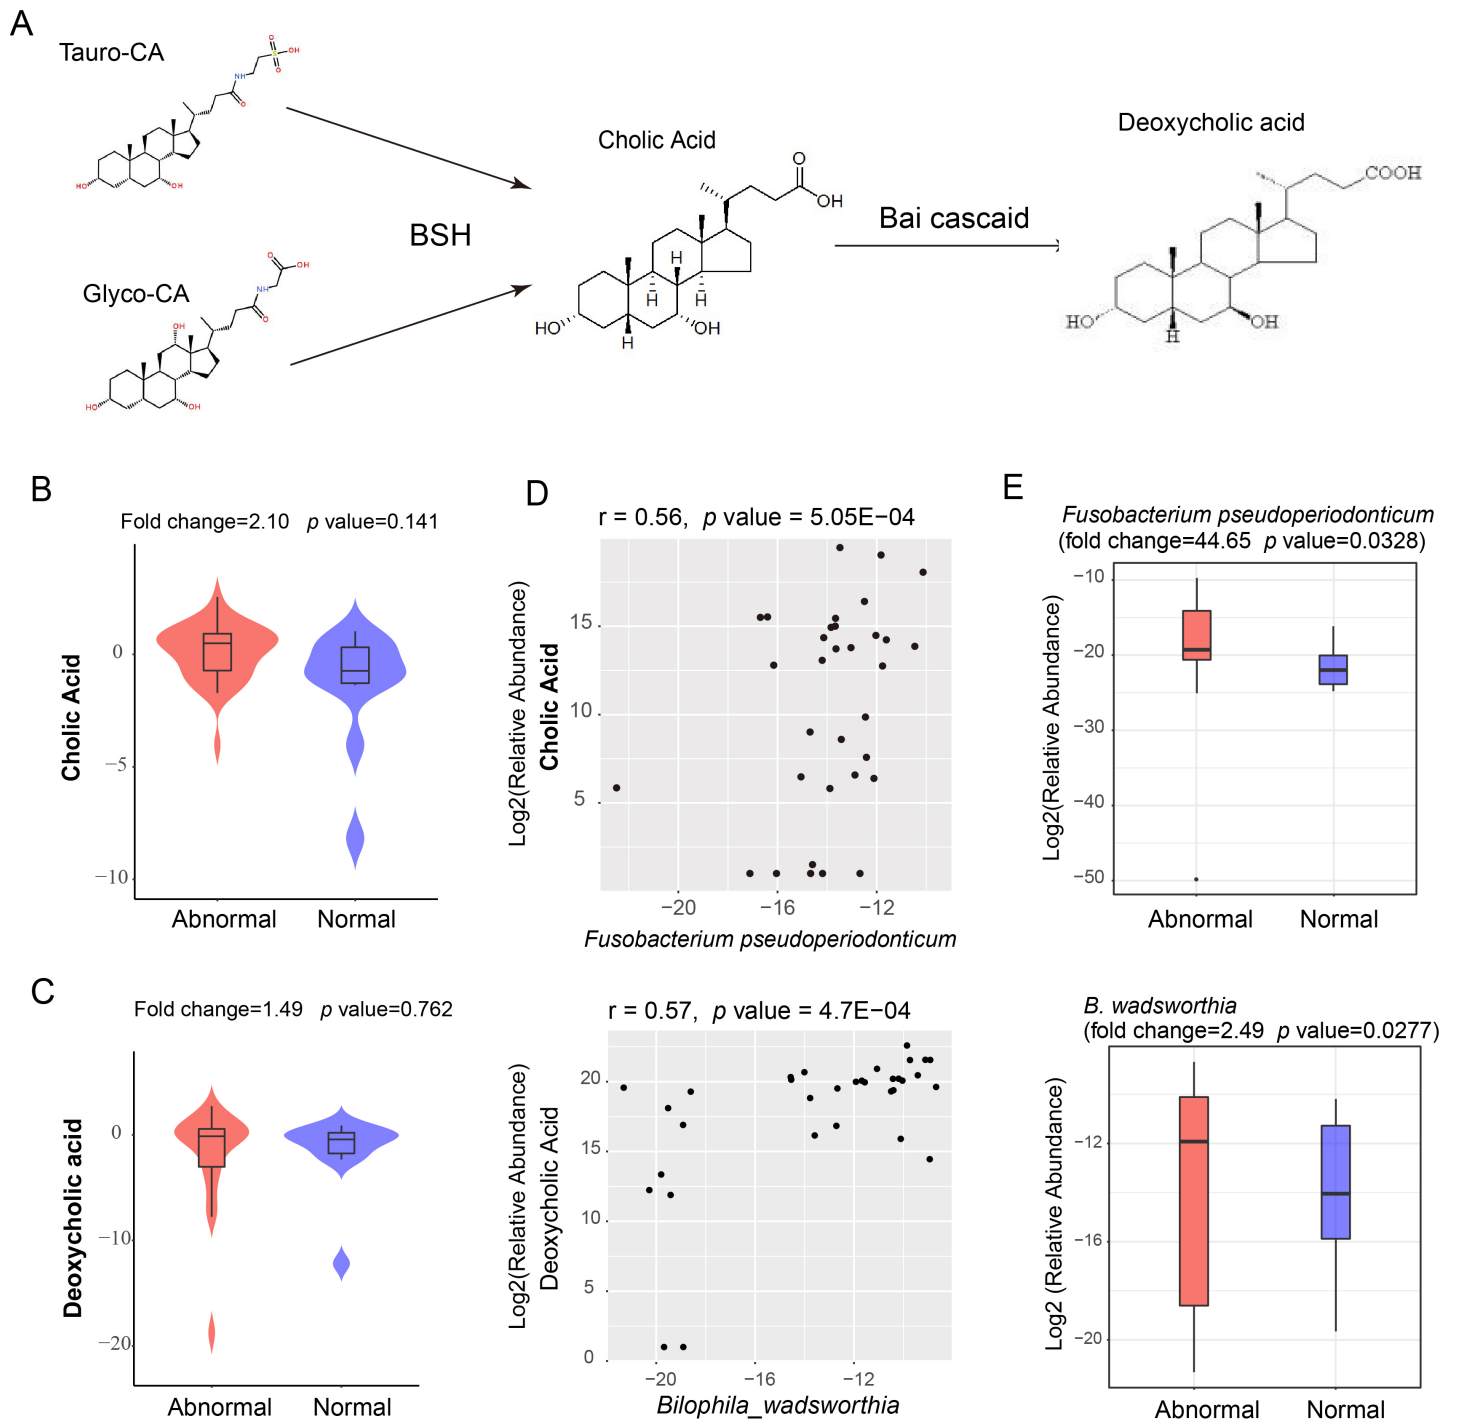

Supplement: gutjnl-2020-323476supp003.pdf [file gutjnl-2020-323476supp003.pdf]

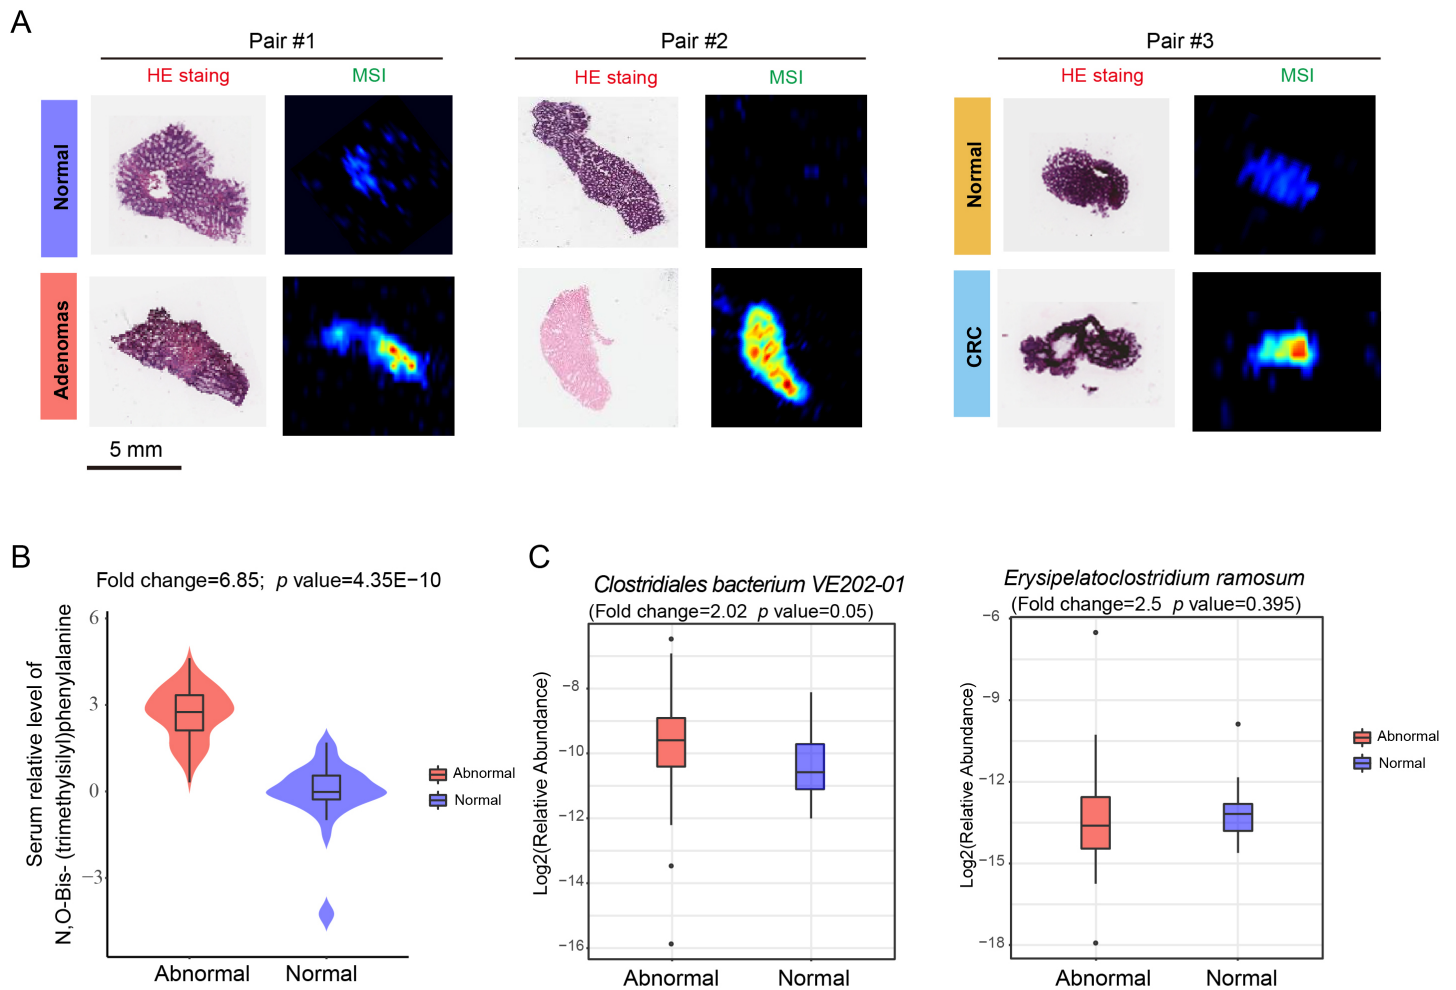

Supplement: gutjnl-2020-323476supp004.pdf [file gutjnl-2020-323476supp004.pdf]
